# Supplementary material for: ECMpy, a Simplified Workflow for Constructing Enzymatic Constrained Metabolic Network Model
Source: MDPI journal article supplement (doi:10.3390/biom12010065), 2022-01-02
Supplement: s1 [file s1]

## Supplementary Material

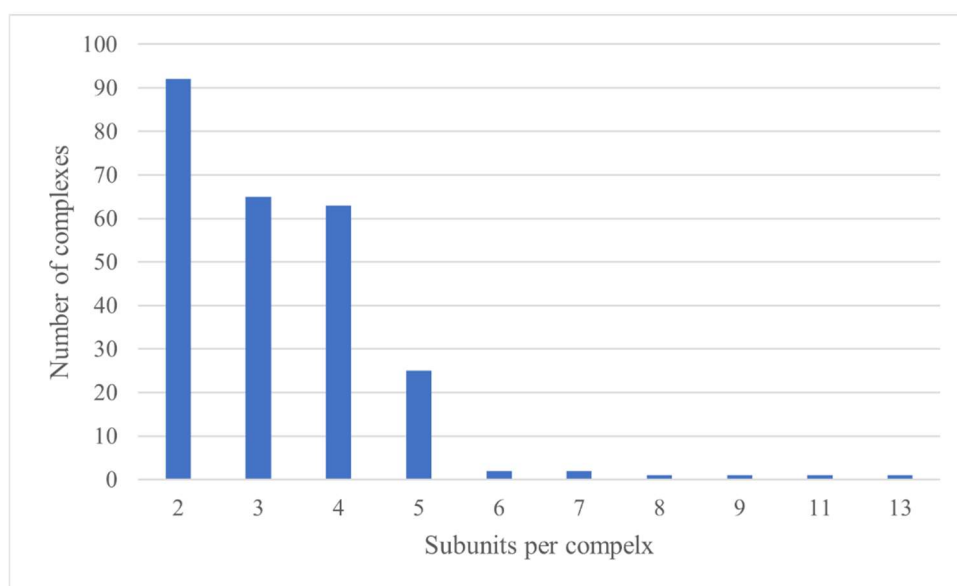

Figure S1 Number of subunits per complex (only consider complex with two or more subunits) in *E. coli*

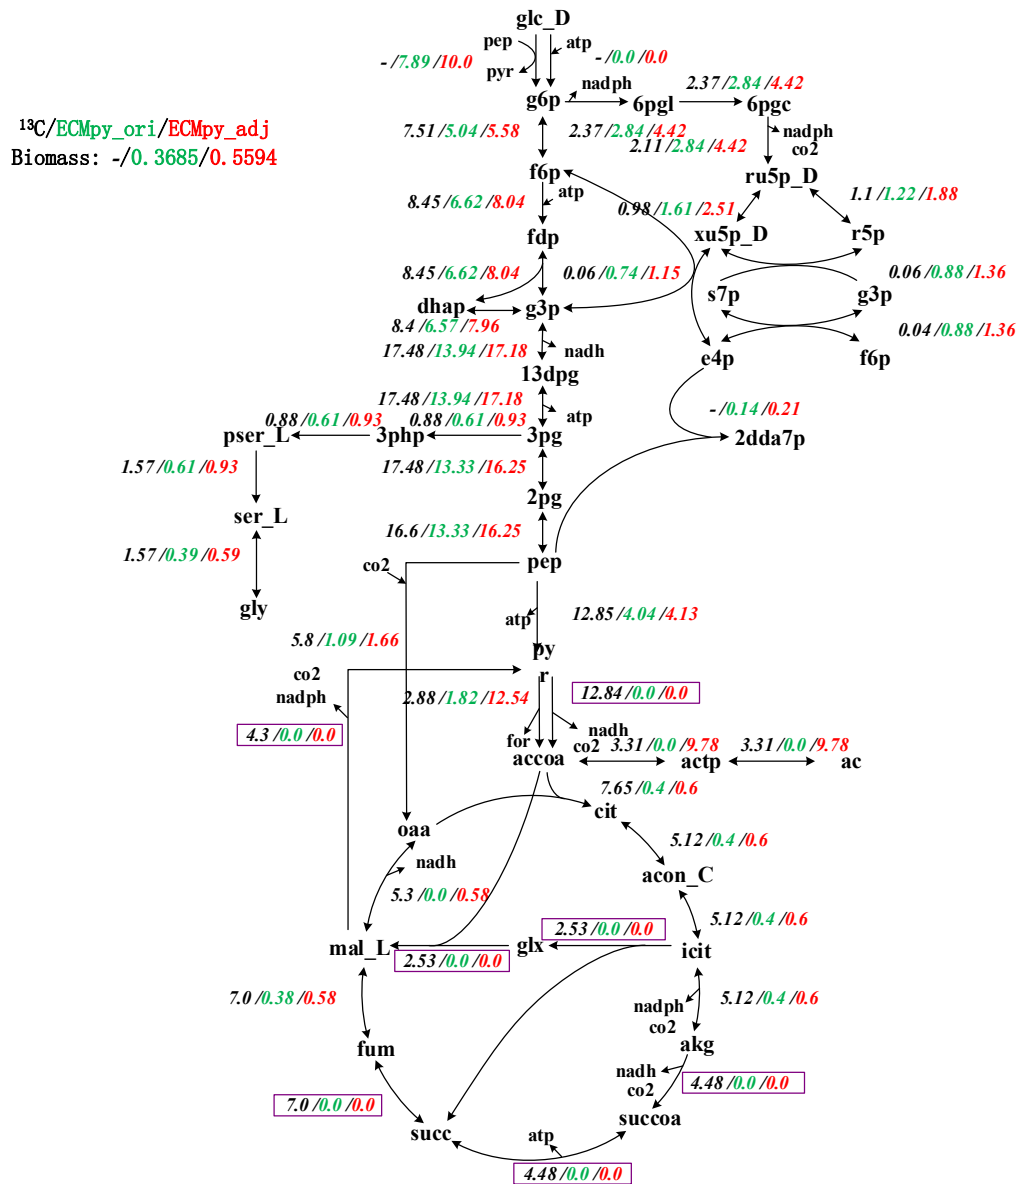

**Figure S2.** Flux comparison of eciML1515\_ori and eciML1515\_adj\_round1. From left to right:  $^{13}\text{C}$  experimental data, prediction results of original ECMpy model, and prediction results of calibrated ECMpy model (using enzyme amount).



**Table S1 The modified genes**

| ID           | Name                                                           | Equation                                                            | Gene_reaction_rule                                                                                       | Modified genes                                                                                                                            | Reason                                                                                                         | Refer<br>ence |
|--------------|----------------------------------------------------------------|---------------------------------------------------------------------|----------------------------------------------------------------------------------------------------------|-------------------------------------------------------------------------------------------------------------------------------------------|----------------------------------------------------------------------------------------------------------------|---------------|
| FMNRx2       | FMN reductase                                                  | fmn_c + h_c +<br>nadph_c --><br>fmnh2_c + nadp_c                    | b0937 or b3844 or<br>( b2764 and b2763 )                                                                 | b0937 or b3844 or b2764                                                                                                                   | CysIJ (b2763 and<br>b2764) are the subunit<br>of sulfite reductase, for<br>this reaction only need<br>b2764    | [1]           |
| ARGabcp<br>p | L-arginine<br>transport via ABC<br>system<br>(periplasm)       | arg__L_p + atp_c +<br>h2o_c --> adp_c +<br>arg__L_c + h_c +<br>pi_c | ( b2310 and b2308 and<br>b2306 and b2307 ) or<br>( b0862 and b0860 and<br>b0864 and b0863 and<br>b0861 ) | ( b2310 and b2308 and b2306<br>and b2307 ) or ( b0862 and<br>b0860 and b0864 and b0861 ) or<br>( b0862 and b0864 and b0863<br>and b0861 ) | ArtI (b0863) is<br>similar to the ArtJ<br>(b0860) arginine<br>binding periplasmic<br>protein of <i>E. coli</i> | [2]           |
| ECAP1p<br>p  | Enterobacterial<br>common antigen<br>polymerase<br>(periplasm) | 2.0 unagamuf_p --><br>eca2und_p + h_p +<br>udcpdp_p                 | b3785 and b3793                                                                                          | b3785 and b3793 and b3792                                                                                                                 | WzxE (b3792) is a<br>"flippase" responsible<br>for movement of lipid<br>III across the<br>membrane bilayer     | [3]           |
| ECAP2p<br>p  | Enterobacterial<br>common antigen<br>polymerase<br>(periplasm) | eca2und_p +<br>unagamuf_p --><br>eca3und_p + h_p +<br>udcpdp_p      | b3785 and b3793                                                                                          | b3785 and b3793 and b3792                                                                                                                 | WzxE (b3792) is a<br>"flippase" responsible<br>for movement of lipid<br>III across the<br>membrane bilayer     | [3]           |

|              |                                                                           |                                                                                                                                             |                                                     |                                                            |                                                                                                           |     |
|--------------|---------------------------------------------------------------------------|---------------------------------------------------------------------------------------------------------------------------------------------|-----------------------------------------------------|------------------------------------------------------------|-----------------------------------------------------------------------------------------------------------|-----|
| FADRx2       | FAD reductase                                                             | fad_c + h_c +<br>nadph_c --><br>fadh2_c + nadp_c                                                                                            | b2764 and b2763                                     | b2764                                                      | CysIJ (b2763 and<br>b2764) are the subunit<br>of sulfite reductase,<br>not for this reaction              | [1] |
| ECAP3p<br>p  | Enterobacterial<br>common antigen<br>polymerase<br>(periplasm)            | eca3und_p +<br>unagamuf_p --><br>eca4und_p + h_p +<br>udcpdp_p                                                                              | b3785 and b3793                                     | b3785 and b3793 and b3792                                  | Wzx (b3792) is a<br>"flippase" responsible<br>for movement of lipid<br>III across the<br>membrane bilayer | [3] |
| BWCOG<br>DS1 | Tungsten bispterin<br>guanine<br>dinucleotide<br>synthase (single<br>GDP) | bwco_c + gtp_c +<br>h_c --> bwco1gdp_c<br>+ ppi_c                                                                                           | ( b3857 and b3856 ) or<br>b3857                     | b3857                                                      | MobB (b3856) is only<br>an adaptor protein,<br>not a enzyme                                               | [4] |
| BWCOG<br>DS2 | Tungsten bispterin<br>guanine<br>dinucleotide<br>synthase                 | bwco1gdp_c +<br>gtp_c + h_c --><br>bwcogdp_c + ppi_c                                                                                        | ( b3857 and b3856 ) or<br>b3857                     | b3857                                                      | MobB (b3856) is only<br>an adaptor protein,<br>not a enzyme                                               | [4] |
| THZPSN<br>3  | Thiazole<br>phosphate<br>synthesis                                        | atp_c + dhgly_c +<br>dxyl5p_c + h_c +<br>iscssh_c + nadph_c -<br>-> 4mpetz_c +<br>amp_c + co2_c + 2.0<br>h2o_c + iscs_c +<br>nadp_c + ppi_c | b3992 and b3990 and<br>b0423 and b2530 and<br>b4407 | b3992 and b3990 and b0423 and<br>b2530 and b4407 and b3991 | ThiG (b3991)<br>participates in the<br>synthesis of the<br>thiazole moiety of<br>thiamine                 | [5] |

|             |                                                                          |                                                                      |                                 |                         |                                                                                            |     |
|-------------|--------------------------------------------------------------------------|----------------------------------------------------------------------|---------------------------------|-------------------------|--------------------------------------------------------------------------------------------|-----|
| BMOGD<br>S1 | Bis-molybdopterin<br>guanine<br>dinucleotide<br>synthase (single<br>GDP) | bmoco_c + gtp_c +<br>h_c --><br>bmoco1gdp_c +<br>ppi_c               | b3857 or ( b3857 and<br>b3856 ) | b3857                   | MobB (b3856) is only<br>an adaptor protein,<br>not a enzyme                                | [5] |
| BMOGD<br>S2 | Bis-molybdopterin<br>guanine<br>dinucleotide<br>synthase                 | bmoco1gdp_c +<br>gtp_c + h_c --><br>bmocogdp_c +<br>ppi_c            | ( b3857 and b3856 ) or<br>b3857 | b3857                   | MobB (b3856) is only<br>an adaptor protein,<br>not a enzyme                                | [4] |
| MOGDS       | Molybdopterin<br>guanine<br>dinucleotide<br>synthase                     | gtp_c + h_c +<br>moco_c --><br>mocogdp_c + ppi_c                     | ( b3857 and b3856 ) or<br>b3857 | b3857                   | MobB (b3856) is only<br>an adaptor protein,<br>not a enzyme                                | [4] |
| 3NTD4p<br>p | 3'-nucleotidase<br>(CMP) (periplasm)                                     | 3cmp_p + h2o_p --><br>cytd_p + pi_p                                  | b0383 or b4213 or<br>b0383      | b0383 or b4213 or b2744 | repeat                                                                                     |     |
| GLUDy       | Glutamate<br>dehydrogenase<br>(NADP)                                     | glu__L_c + h2o_c +<br>nadp_c <=> akg_c +<br>h_c + nadph_c +<br>nh4_c | b1761 or ( b3213 and<br>b3212 ) | b1761                   | b3213 and b3212<br>encode glutamate<br>synthase, the<br>corresponding<br>reaction is GLUSy |     |

## References

- [1]. Siegel, L. M., D. C. 3. Rueger, M. J. Barber, R. J. Krueger, N. R. Orme-Johnson and W. H. Orme-Johnson (1982). "Escherichia coli sulfite reductase hemoprotein subunit. Prosthetic groups, catalytic parameters, and ligand complexes." J Biol Chem 257(11): 6343-6350.
- [2]. Wissenbach, U., S. Six, J. Bongaerts, D. Ternes, S. Steinwachs and G. Uden (1995). "A third periplasmic transport system for L-arginine in Escherichia coli: molecular characterization of the artPIQMJ genes, arginine binding and transport." Mol Microbiol 17(4): 675-686.

- [3]. Rick, P. D., K. Barr, K. Sankaran, J. Kajimura, J. S. Rush and C. J. Waechter (2003). "Evidence that the wzxE gene of Escherichia coli K-12 encodes a protein involved in the transbilayer movement of a trisaccharide-lipid intermediate in the assembly of enterobacterial. common antigen." J Biol Chem 278(19): 16534-16542
- [4]. Palmer, T., C. L. Santini, C. Iobbi-Nivol, D. J. Eaves, D. H. Boxer and G. Giordano (1996). "Involvement of the narJ and mob gene products in distinct steps in the biosynthesis of the molybdoenzyme nitrate reductase in Escherichia coli." Mol Microbiol 20(4): 875-884.
- [5]. Vander Horn, P. B., A. D. Backstrom, V. Stewart and T. P. Begley (1993). "Structural genes for thiamine biosynthetic enzymes (thiCEFGH) in Escherichia coli K-12." J Bacteriol 175(4): 982-992.

**Table S2 The corrected kinetic parameters**

| Model            | ID       | Equation                                                                                                                     | $k_{cat}(\text{original})$ | MW     | $k_{cat}/\text{MW}$<br>(original ) | $k_{cat}(\text{1/h})$<br>(corrected) | $k_{cat}/\text{MW}$<br>(corrected) | growth<br>rate |
|------------------|----------|------------------------------------------------------------------------------------------------------------------------------|----------------------------|--------|------------------------------------|--------------------------------------|------------------------------------|----------------|
| iML1515          | -        | -                                                                                                                            | -                          | -      | -                                  | -                                    | -                                  | 0.8698         |
| eciML1515        | -        | -                                                                                                                            | -                          | -      | -                                  | -                                    | -                                  | 0.3685         |
| eciML1515_round1 | GAPD     | $\text{g3p\_c} + \text{nad\_c} + \text{pi\_c} \rightarrow \text{13dpg\_c} + \text{h\_c} + \text{nadh\_c}$                    | 104400                     | 142.13 | 734.54                             | 3596400                              | 25303.60                           | 0.5594         |
|                  | ENO      | $2\text{pg\_c} \rightarrow \text{h2o\_c} + \text{pep\_c}$                                                                    | 86400                      | 91.31  | 946.23                             | 828000                               | 9068.02                            |                |
|                  | FBA_num1 | $\text{fdp\_c} \rightarrow \text{dhap\_c} + \text{g3p\_c}$                                                                   | 37445.93                   | 78.29  | 478.27                             | 313200                               | 4000.28                            |                |
|                  | NADH16pp | $4.0 \text{ h\_c} + \text{nadh\_c} + \text{q8\_c} \rightarrow 3.0 \text{ h\_p} + \text{nad\_c} + \text{q8h2\_c}$             | 700176.04                  | 540.41 | 1295.63                            | 5400000                              | 9992.34                            |                |
|                  | RBFSa    | $4\text{r5au\_c} + \text{db4p\_c} \rightarrow \text{dmlz\_c} + 2.0 \text{ h2o\_c} + \text{pi\_c}$                            | 36                         | 969.39 | 0.037                              | 7200                                 | 7.43                               |                |
|                  | KARA2    | $2\text{ahbut\_c} + \text{h\_c} + \text{nadph\_c} \rightarrow 23\text{dhmp\_c} + \text{nadp\_c}$                             | 2700                       | 216.28 | 12.48                              | 281880                               | 1303.33                            |                |
|                  | ACCOAC   | $\text{accoa\_c} + \text{atp\_c} + \text{hco3\_c} \rightarrow \text{adp\_c} + \text{h\_c} + \text{malcoa\_c} + \text{pi\_c}$ | 28564.89                   | 252.46 | 113.15                             | 132480                               | 524.77                             |                |

|                  |           |                                                         |           |         |         |          |           |        |
|------------------|-----------|---------------------------------------------------------|-----------|---------|---------|----------|-----------|--------|
|                  | METS_num2 | 5mthf_c + hcys_L_c --> h_c + met_L_c + thf_c            | 1116      | 84.67   | 13.18   | 3596400  | 42473.74  |        |
|                  | GND       | 6pgc_c + nadp_c --> co2_c + nadph_c + ru5p_D_c          | 79200     | 102.96  | 769.21  | 1170000  | 11363.35  |        |
|                  | GHMT2r    | ser_L_c + thf_c --> gly_c + h2o_c + mlthf_c             | 11520     | 90.63   | 127.11  | 3596400  | 39680.82  |        |
|                  | GLNS      | atp_c + glu_L_c + nh4_c -> adp_c + gln_L_c + h_c + pi_c | 119723.28 | 622.85  | 192.22  | 3596400  | 5774.15   |        |
|                  | PPC       | co2_c + h2o_c + pep_c --> h_c + oaa_c + pi_c            | 165600    | 396.25  | 417.92  | 3596400  | 9076.08   |        |
|                  | METAT     | atp_c + h2o_c + met_L_c -> amet_c + pi_c + ppi_c        | 21.6      | 167.81  | 0.13    | 27000    | 160.90    |        |
|                  | PGI       | g6p_c --> f6p_c                                         | 255600    | 123.06  | 2077.04 | 41112000 | 334082.29 |        |
| eciML1515_round2 | AKGDH     | akg_c + coa_c + nad_c --> co2_c + nadh_c + succoa_c     | 112697.45 | 2418.39 | 46.60   | 3596400  | 1487.10   | 0.6802 |
|                  | PDH       | coa_c + nad_c + pyr_c --> accoa_c + co2_c + nadh_c      | 270261.52 | 4586.61 | 58.92   | 3596400  | 784.11    |        |

**Table S3 The corrected kinetic parameters**

| ID             | MW(kDa)  | kcat(1/h)(original) | kcat/MW(original) | kcat(1/h)(corrected) | kcat/MW(corrected) |
|----------------|----------|---------------------|-------------------|----------------------|--------------------|
| ALATA_D2_num1  | 90.6332  | 9300.506998         | 102.616999        | 9300.506998          | 102.616999         |
| ALATA_D2_num2  | 145.9788 | 9300.506998         | 63.71135396       | 9300.506998          | 63.71135396        |
| SHCHD2         | 99.9028  | 1224                | 12.25190886       | 1224                 | 12.25190886        |
| CPPPGO         | 68.6453  | 900                 | 13.11087576       | 900                  | 13.11087576        |
| GTHOr          | 97.545   | 25901.61614         | 265.5350468       | 25901.61614          | 265.5350468        |
| DHORD5         | 36.7745  | 38657.17404         | 1051.195096       | 38657.17404          | 1051.195096        |
| GLYCTO2        | 137.2828 | 50485.46818         | 367.7479493       | 50485.46818          | 367.7479493        |
| GLYCTO3        | 137.2828 | 57086.12156         | 415.8286513       | 57086.12156          | 415.8286513        |
| GLYCTO4        | 137.2828 | 117077.842          | 852.8223641       | 117077.842           | 852.8223641        |
| PFK_3          | 139.3682 | 208800              | 1498.189687       | 208800               | 1498.189687        |
| TRPS2          | 143.4143 | 9309.205094         | 64.9112752        | 9309.205094          | 64.9112752         |
| G3PD5_num1     | 148.4235 | 60326.17992         | 406.4462832       | 60326.17992          | 406.4462832        |
| G3PD5_num2     | 113.5011 | 60326.17992         | 531.503042        | 60326.17992          | 531.503042         |
| LEUTAi_num1    | 204.5619 | 54098.62261         | 264.4608923       | 54098.62261          | 264.4608923        |
| LEUTAi_num2    | 87.0756  | 54098.62261         | 621.2833746       | 54098.62261          | 621.2833746        |
| SHK3Dr         | 29.4136  | 46104.63948         | 1567.459933       | 46104.63948          | 1567.459933        |
| SHK3Dr_reverse | 62.4556  | 29504.42482         | 472.4063946       | 29504.42482          | 472.4063946        |
| G5SD           | 178.5202 | 50400               | 282.3209922       | 50400                | 282.3209922        |
| ALATA_L2_num1  | 145.9788 | 22488.04715         | 154.0500891       | 22488.04715          | 154.0500891        |
| ALATA_L2_num2  | 90.6332  | 22488.04715         | 248.1215178       | 22488.04715          | 248.1215178        |
| MAN6PI         | 42.85    | 39462.13397         | 920.9366154       | 39462.13397          | 920.9366154        |

|                   |              |             |             |             |             |
|-------------------|--------------|-------------|-------------|-------------|-------------|
| APRAUR            | 80.676<br>6  | 1152        | 14.27923338 | 1152        | 14.27923338 |
| DB4PS             | 46.706<br>9  | 1224        | 26.20597813 | 1224        | 26.20597813 |
| RBFK              | 34.734<br>3  | 324         | 9.327955364 | 324         | 9.327955364 |
| ACP1_FMN_num<br>1 | 30.370<br>9  | 23467.23572 | 772.688189  | 23467.23572 | 772.688189  |
| ACP1_FMN_num<br>2 | 27.121<br>8  | 23467.23572 | 865.2536233 | 23467.23572 | 865.2536233 |
| ACP1_FMN_num<br>3 | 30.196<br>2  | 23467.23572 | 777.1585736 | 23467.23572 | 777.1585736 |
| RBFSb             | 70.334<br>7  | 108         | 1.535515187 | 108         | 1.535515187 |
| DMATT             | 32.159<br>6  | 432         | 13.4330029  | 432         | 13.4330029  |
| GRTT              | 32.159<br>6  | 432         | 13.4330029  | 432         | 13.4330029  |
| UPP3S             | 27.797<br>9  | 3600        | 129.5061857 | 3600        | 129.5061857 |
| UPPDC1            | 39.248<br>1  | 2916        | 74.29659015 | 2916        | 74.29659015 |
| TMDPP             | 94.414<br>2  | 30479.00062 | 322.8222092 | 30479.00062 | 322.8222092 |
| HCO3E_num1        | 100.38<br>71 | 32760       | 326.3367504 | 32760       | 326.3367504 |
| HCO3E_num2        | 47.528<br>5  | 32760       | 689.2706481 | 32760       | 689.2706481 |
| IMPC              | 57.329<br>2  | 17248.07481 | 300.8602041 | 17248.07481 | 300.8602041 |
| IMPD              | 208.08<br>98 | 6480        | 31.14040188 | 6480        | 31.14040188 |
| ECOA4H_num1       | 77.072<br>2  | 41618.87183 | 539.9984927 | 41618.87183 | 539.9984927 |
| ECOA4H_num2       | 159.18<br>78 | 41618.87183 | 261.4451097 | 41618.87183 | 261.4451097 |
| GLUTRS            | 53.815<br>7  | 324         | 6.020547907 | 324         | 6.020547907 |
| TMPPP             | 23.015<br>3  | 72          | 3.128353747 | 72          | 3.128353747 |
| URIK1             | 24.353<br>1  | 19423.5383  | 797.5797043 | 19423.5383  | 797.5797043 |
| URIK2             | 24.353<br>1  | 9433.623334 | 387.3684801 | 9433.623334 | 387.3684801 |

|              |               |             |             |             |             |
|--------------|---------------|-------------|-------------|-------------|-------------|
| CYTDK1       | 24.353<br>1   | 9981.4541   | 409.8637997 | 9981.4541   | 409.8637997 |
| CYTDK2       | 24.353<br>1   | 9559.089353 | 392.5204328 | 9559.089353 | 392.5204328 |
| XPPT         | 67.882<br>4   | 10439.90187 | 153.7939417 | 10439.90187 | 153.7939417 |
| HXPRT_num1   | 67.882<br>4   | 17665.84585 | 260.2419161 | 17665.84585 | 260.2419161 |
| HXPRT_num2   | 80.461        | 17665.84585 | 219.5578709 | 17665.84585 | 219.5578709 |
| NDPK5_num1   | 23.586        | 9864.913493 | 418.2529252 | 9864.913493 | 418.2529252 |
| NDPK5_num2   | 61.853<br>8   | 9864.913493 | 159.48759   | 9864.913493 | 159.48759   |
| DHORTS       | 77.654<br>8   | 37265.83384 | 479.8909254 | 37265.83384 | 479.8909254 |
| OMPDC        | 52.700<br>5   | 86400       | 1639.453136 | 86400       | 1639.453136 |
| CS           | 288.08<br>99  | 104400      | 362.3868799 | 104400      | 362.3868799 |
| ICDHyr       | 91.513<br>4   | 39600       | 432.7235137 | 39600       | 432.7235137 |
| ACALD_num1   | 33.442<br>5   | 347838.2822 | 10401.08491 | 347838.2822 | 10401.08491 |
| ACALD_num2   | 3845.0<br>896 | 347838.2822 | 90.46298484 | 347838.2822 | 90.46298484 |
| ACS          | 72.093<br>6   | 32028.81133 | 444.2670546 | 32028.81133 | 444.2670546 |
| PPA_num1     | 116.27<br>19  | 303342.6722 | 2608.907846 | 303342.6722 | 2608.907846 |
| PPA_num2     | 26.900<br>4   | 303342.6722 | 11276.51158 | 303342.6722 | 11276.51158 |
| PPA_num3     | 118.22<br>14  | 303342.6722 | 2565.886313 | 303342.6722 | 2565.886313 |
| PPCK         | 59.643<br>5   | 97061.54587 | 1627.361672 | 97061.54587 | 1627.361672 |
| ME1          | 252.78<br>93  | 60940.10038 | 241.0707272 | 60940.10038 | 241.0707272 |
| ALAR_num1    | 77.689<br>2   | 113967.7232 | 1466.969968 | 113967.7232 | 1466.969968 |
| ALAR_num2    | 78.305<br>9   | 113967.7232 | 1455.416811 | 113967.7232 | 1455.416811 |
| ALATA_L_num1 | 91.034<br>7   | 63159.7104  | 693.7981934 | 63159.7104  | 693.7981934 |
| ALATA_L_num2 | 92.432        | 63159.7104  | 683.3070482 | 63159.7104  | 683.3070482 |

|             |              |             |             |             |             |
|-------------|--------------|-------------|-------------|-------------|-------------|
|             | 4            |             |             |             |             |
| XYLK_num1   | 122.17<br>88 | 24801.49779 | 202.9934636 | 24801.49779 | 202.9934636 |
| XYLK_num2   | 105.23<br>65 | 24801.49779 | 235.6739135 | 24801.49779 | 235.6739135 |
| RBK         | 64.581       | 59351.15383 | 919.018811  | 59351.15383 | 919.018811  |
| GLYK        | 224.92<br>31 | 45670.44197 | 203.0491398 | 45670.44197 | 203.0491398 |
| PPM         | 44.37        | 158919.1397 | 3581.679958 | 158919.1397 | 3581.679958 |
| ASPTA_num1  | 87.146<br>7  | 13921.64902 | 159.7495834 | 13921.64902 | 159.7495834 |
| ASPTA_num2  | 87.075<br>6  | 13921.64902 | 159.880024  | 13921.64902 | 159.880024  |
| FBP_num1    | 68.646<br>9  | 274394.2568 | 3997.183511 | 274394.2568 | 3997.183511 |
| FBP_num2    | 147.33<br>57 | 274394.2568 | 1862.374542 | 274394.2568 | 1862.374542 |
| FBP_num3    | 71.704<br>6  | 274394.2568 | 3826.731573 | 274394.2568 | 3826.731573 |
| FBP_num4    | 29.721<br>1  | 274394.2568 | 9232.304887 | 274394.2568 | 9232.304887 |
| GLGC        | 194.79<br>06 | 18829.61562 | 96.66593572 | 18829.61562 | 96.66593572 |
| PYK_num1    | 205.42<br>86 | 427444.7782 | 2080.746197 | 427444.7782 | 2080.746197 |
| PYK_num2    | 202.91<br>77 | 427444.7782 | 2106.493313 | 427444.7782 | 2106.493313 |
| A5PISO_num1 | 140.78<br>43 | 55549.16712 | 394.5693314 | 55549.16712 | 394.5693314 |
| A5PISO_num2 | 136.12<br>57 | 55549.16712 | 408.0725911 | 55549.16712 | 408.0725911 |
| IPPMlb      | 72.369<br>3  | 23255.09457 | 321.3392222 | 23255.09457 | 321.3392222 |
| ACHBS_num1  | 143.09<br>27 | 67064.87156 | 468.6812924 | 67064.87156 | 468.6812924 |
| ACHBS_num2  | 161.92<br>22 | 67064.87156 | 414.1795971 | 67064.87156 | 414.1795971 |
| ACLS_num1   | 161.92<br>22 | 241177.3205 | 1489.464202 | 241177.3205 | 1489.464202 |
| ACLS_num2   | 143.09<br>27 | 241177.3205 | 1685.462085 | 241177.3205 | 1685.462085 |
| PSCVT       | 46.095<br>8  | 75600       | 1640.062652 | 75600       | 1640.062652 |

|            |              |             |             |             |             |
|------------|--------------|-------------|-------------|-------------|-------------|
| ANS        | 228.72<br>88 | 17526.9833  | 76.62779371 | 17526.9833  | 76.62779371 |
| ANPRT      | 113.73<br>99 | 18000       | 158.25581   | 18000       | 158.25581   |
| CHORM_num1 | 86.222<br>7  | 123098.1309 | 1427.676596 | 123098.1309 | 1427.676596 |
| CHORM_num2 | 84.085       | 123098.1309 | 1463.972538 | 123098.1309 | 1463.972538 |
| CHORS      | 156.54<br>98 | 151200      | 965.8268487 | 151200      | 965.8268487 |
| IGPS       | 49.492<br>3  | 18000       | 363.6929381 | 18000       | 363.6929381 |
| ECOA6_num1 | 77.072<br>2  | 36593.98049 | 474.8012966 | 36593.98049 | 474.8012966 |
| ECOA6_num2 | 159.18<br>78 | 36593.98049 | 229.8793029 | 36593.98049 | 229.8793029 |
| ENO        | 91.309<br>9  | 86400       | 946.2281746 | 828000      | 9068.020007 |
| FBA_num1   | 78.294<br>5  | 37445.93179 | 478.2702718 | 313200      | 4000.28099  |
| FBA_num2   | 381.09<br>19 | 37445.93179 | 98.25958461 | 37445.93179 | 98.25958461 |
| MGSA       | 101.51<br>15 | 10091.64245 | 99.41378514 | 10091.64245 | 99.41378514 |
| PPS        | 174.87<br>02 | 370888.9427 | 2120.938517 | 370888.9427 | 2120.938517 |
| PGI        | 123.05<br>95 | 255600      | 2077.044032 | 41112000    | 334082.2935 |
| PGK        | 41.118<br>2  | 81612.68645 | 1984.831205 | 81612.68645 | 1984.831205 |
| EDA        | 66.852<br>1  | 44337.53138 | 663.2182293 | 44337.53138 | 663.2182293 |
| PGL        | 36.307<br>6  | 662400      | 18244.11418 | 662400      | 18244.11418 |
| RPE        | 24.554<br>2  | 198533.1876 | 8085.508288 | 198533.1876 | 8085.508288 |
| TALA_num1  | 70.438<br>5  | 49937.71597 | 708.9548467 | 49937.71597 | 708.9548467 |
| TALA_num2  | 35.658<br>8  | 49937.71597 | 1400.431758 | 49937.71597 | 1400.431758 |
| TKT1_num1  | 144.42<br>35 | 182904.1236 | 1266.442951 | 182904.1236 | 1266.442951 |
| TKT1_num2  | 73.042<br>7  | 182904.1236 | 2504.07123  | 182904.1236 | 2504.07123  |

|             |               |             |             |             |             |
|-------------|---------------|-------------|-------------|-------------|-------------|
| G6PDA       | 178.64<br>52  | 151224.2552 | 846.5061206 | 151224.2552 | 846.5061206 |
| ALCD2x_num1 | 3845.0<br>896 | 65388.1289  | 17.00561904 | 65388.1289  | 17.00561904 |
| ALCD2x_num2 | 141.51<br>83  | 65388.1289  | 462.0471621 | 65388.1289  | 462.0471621 |
| ALDD2y_num1 | 29.410<br>2   | 22093.1682  | 751.2076831 | 22093.1682  | 751.2076831 |
| ALDD2y_num2 | 84.194        | 22093.1682  | 262.4078699 | 22093.1682  | 262.4078699 |
| ALDD2y_num3 | 225.22<br>54  | 22093.1682  | 98.09359069 | 22093.1682  | 98.09359069 |
| ALDD2y_num4 | 31.488        | 22093.1682  | 701.6377096 | 22093.1682  | 701.6377096 |
| ALDD2y_num5 | 36.501<br>8   | 22093.1682  | 605.2624309 | 22093.1682  | 605.2624309 |
| RMI         | 188.79<br>78  | 34888.97517 | 184.7954541 | 34888.97517 | 184.7954541 |
| FMNAT       | 34.734<br>3   | 324         | 9.327955364 | 324         | 9.327955364 |
| NADDP_num1  | 59.377<br>9   | 10638.00544 | 179.157657  | 10638.00544 | 179.157657  |
| NADDP_num2  | 73.606<br>1   | 10638.00544 | 144.526139  | 10638.00544 | 144.526139  |
| NMNAT_num1  | 189.38<br>33  | 9306.715666 | 49.14221933 | 9306.715666 | 49.14221933 |
| NMNAT_num2  | 24.528        | 9306.715666 | 379.4323086 | 9306.715666 | 379.4323086 |
| HMPK1_num1  | 114.53<br>44  | 15927.76481 | 139.065336  | 15927.76481 | 139.065336  |
| HMPK1_num2  | 61.694<br>8   | 15927.76481 | 258.1702966 | 15927.76481 | 258.1702966 |
| NDPK6_num1  | 23.586        | 9855.575546 | 417.8570146 | 9855.575546 | 417.8570146 |
| NDPK6_num2  | 61.853<br>8   | 9855.575546 | 159.3366219 | 9855.575546 | 159.3366219 |
| NDPK8_num1  | 23.586        | 15171.87038 | 643.2574568 | 15171.87038 | 643.2574568 |
| NDPK8_num2  | 61.853<br>8   | 15171.87038 | 245.2859869 | 15171.87038 | 245.2859869 |
| PYNP2r      | 162.95<br>45  | 44972.73011 | 275.983358  | 44972.73011 | 275.983358  |
| DURIPP_num1 | 94.414<br>2   | 31920.23239 | 338.0871987 | 31920.23239 | 338.0871987 |
| DURIPP_num2 | 155.69<br>95  | 31920.23239 | 205.0117848 | 31920.23239 | 205.0117848 |
| PTRCTA      | 99.322<br>7   | 36125.7943  | 363.7214282 | 36125.7943  | 363.7214282 |

|             |              |             |             |             |             |
|-------------|--------------|-------------|-------------|-------------|-------------|
| CYSDS_num1  | 172.84<br>95 | 13182.37802 | 76.26506305 | 13182.37802 | 76.26506305 |
| CYSDS_num2  | 211.09<br>38 | 13182.37802 | 62.44796396 | 13182.37802 | 62.44796396 |
| TRPAS2      | 211.09<br>38 | 23909.43164 | 113.2644902 | 23909.43164 | 113.2644902 |
| NDP3_num1   | 17.432<br>9  | 34101.47047 | 1956.155916 | 34101.47047 | 1956.155916 |
| NDP3_num2   | 35.352<br>7  | 34101.47047 | 964.6072427 | 34101.47047 | 964.6072427 |
| CDPPH       | 35.352<br>7  | 28855.36431 | 816.2138763 | 28855.36431 | 816.2138763 |
| NDP7        | 35.352<br>7  | 33721.60938 | 953.8623465 | 33721.60938 | 953.8623465 |
| PMDPHT_num1 | 30.196<br>2  | 9471.620437 | 313.6692841 | 9471.620437 | 313.6692841 |
| PMDPHT_num2 | 27.121<br>8  | 9471.620437 | 349.2253625 | 9471.620437 | 349.2253625 |
| ILETA       | 204.56<br>19 | 22229.68578 | 108.6697268 | 22229.68578 | 108.6697268 |
| VALTA       | 204.56<br>19 | 9473.113026 | 46.30927375 | 9473.113026 | 46.30927375 |
| ORPT        | 47.134       | 11843.91592 | 251.2817906 | 11843.91592 | 251.2817906 |
| RBFSa       | 969.39<br>06 | 36          | 0.037136733 | 7200        | 7.427346624 |
| DHAD2       | 131.06<br>31 | 500400      | 3818.008272 | 500400      | 3818.008272 |
| G1PP_num1   | 22.731<br>8  | 9921.660322 | 436.4661101 | 9921.660322 | 436.4661101 |
| G1PP_num2   | 23.007<br>5  | 9921.660322 | 431.2359153 | 9921.660322 | 431.2359153 |
| G1PP_num3   | 29.721<br>1  | 9921.660322 | 333.8254749 | 9921.660322 | 333.8254749 |
| PFL_num1    | 118.38<br>94 | 66265.40938 | 559.7241761 | 66265.40938 | 559.7241761 |
| PFL_num2    | 198.91<br>87 | 66265.40938 | 333.128104  | 66265.40938 | 333.128104  |
| PFL_num3    | 114.13<br>98 | 66265.40938 | 580.5635666 | 66265.40938 | 580.5635666 |
| PFL_num4    | 213.20<br>29 | 66265.40938 | 310.8091371 | 66265.40938 | 310.8091371 |
| FRD2        | 121.21<br>66 | 39705.41401 | 327.5575623 | 39705.41401 | 327.5575623 |

|            |              |             |             |             |             |
|------------|--------------|-------------|-------------|-------------|-------------|
| FRD3       | 121.21<br>66 | 40135.54568 | 331.1060175 | 40135.54568 | 331.1060175 |
| POX        | 248.04<br>55 | 11451.84521 | 46.1683248  | 11451.84521 | 46.1683248  |
| PTAr_num1  | 463.03<br>25 | 547821.7643 | 1183.117307 | 547821.7643 | 1183.117307 |
| PTAr_num2  | 72.133<br>5  | 547821.7643 | 7594.554046 | 547821.7643 | 7594.554046 |
| ACKr_num1  | 42.433<br>7  | 168823.2518 | 3978.518295 | 168823.2518 | 3978.518295 |
| ACKr_num2  | 43.290<br>4  | 168823.2518 | 3899.784982 | 168823.2518 | 3899.784982 |
| ACKr_num3  | 43.384<br>1  | 168823.2518 | 3891.362315 | 168823.2518 | 3891.362315 |
| MOAT       | 47.291<br>1  | 212400      | 4491.33135  | 212400      | 4491.33135  |
| UDCPDPS    | 56.888<br>3  | 504         | 8.859466709 | 504         | 8.859466709 |
| USHD       | 26.894<br>2  | 20475.11943 | 761.3210071 | 20475.11943 | 761.3210071 |
| LPADSS     | 84.764<br>9  | 187200      | 2208.461285 | 187200      | 2208.461285 |
| TDSK       | 35.589<br>3  | 26884.71438 | 755.4156554 | 26884.71438 | 755.4156554 |
| NTPP1_num1 | 14.927<br>1  | 29218.07367 | 1957.384466 | 29218.07367 | 1957.384466 |
| NTPP1_num2 | 60.824<br>6  | 29218.07367 | 480.3660635 | 29218.07367 | 480.3660635 |
| NTPP2_num1 | 14.927<br>1  | 10172.32877 | 681.4671817 | 10172.32877 | 681.4671817 |
| NTPP2_num2 | 60.824<br>6  | 10172.32877 | 167.2403726 | 10172.32877 | 167.2403726 |
| NTPTP1     | 356.29<br>76 | 28199.90188 | 79.14704417 | 28199.90188 | 79.14704417 |
| NTPTP2     | 356.29<br>76 | 58754.90664 | 164.9040202 | 58754.90664 | 164.9040202 |
| IPMD_num1  | 79.034       | 17640       | 223.1950806 | 17640       | 223.1950806 |
| IPMD_num2  | 40.314<br>9  | 17640       | 437.5553455 | 17640       | 437.5553455 |
| AIRC3      | 142.24<br>26 | 11996.22974 | 84.33640654 | 11996.22974 | 84.33640654 |
| ADSL2r     | 206.17<br>12 | 54000       | 261.9182505 | 54000       | 261.9182505 |

|            |              |             |             |             |             |
|------------|--------------|-------------|-------------|-------------|-------------|
| PUNP5_num1 | 179.00<br>77 | 18776.87584 | 104.8942355 | 18776.87584 | 104.8942355 |
| PUNP5_num2 | 155.69<br>95 | 18776.87584 | 120.5968924 | 18776.87584 | 120.5968924 |
| PUNP6_num1 | 155.69<br>95 | 19606.60291 | 125.9259208 | 19606.60291 | 125.9259208 |
| PUNP6_num2 | 179.00<br>77 | 19606.60291 | 109.5293829 | 19606.60291 | 109.5293829 |
| PUNP7      | 179.00<br>77 | 19138.3919  | 106.9137914 | 19138.3919  | 106.9137914 |
| RNDR1_num1 | 274.13<br>99 | 9882.90527  | 36.05059048 | 9882.90527  | 36.05059048 |
| RNDR1_num2 | 270.39<br>17 | 9882.90527  | 36.5503278  | 9882.90527  | 36.5503278  |
| RNDR3_num1 | 270.39<br>17 | 12566.47479 | 46.47507593 | 12566.47479 | 46.47507593 |
| RNDR3_num2 | 274.13<br>99 | 12566.47479 | 45.83964169 | 12566.47479 | 45.83964169 |
| RNDR4_num1 | 270.39<br>17 | 10859.48639 | 40.16205523 | 10859.48639 | 40.16205523 |
| RNDR4_num2 | 274.13<br>99 | 10859.48639 | 39.61293628 | 10859.48639 | 39.61293628 |
| TMDS       | 60.959<br>4  | 26640       | 437.0121753 | 26640       | 437.0121753 |
| TMDK1      | 23.456<br>6  | 9983.48333  | 425.6151075 | 9983.48333  | 425.6151075 |
| PPCDC      | 521.25<br>77 | 540         | 1.03595592  | 540         | 1.03595592  |
| FTHFD      | 191.60<br>83 | 11273.54495 | 58.83641234 | 11273.54495 | 58.83641234 |
| EDD        | 64.639       | 48328.78694 | 747.6722558 | 48328.78694 | 747.6722558 |
| DHQTi      | 54.933<br>3  | 212400      | 3866.507201 | 212400      | 3866.507201 |
| PUNP1      | 155.69<br>95 | 17754.49068 | 114.0304926 | 17754.49068 | 114.0304926 |
| PUNP2      | 155.69<br>95 | 16381.18715 | 105.2102746 | 16381.18715 | 105.2102746 |
| PUNP3_num1 | 179.00<br>77 | 16041.29791 | 89.61233461 | 16041.29791 | 89.61233461 |
| PUNP3_num2 | 155.69<br>95 | 16041.29791 | 103.0272924 | 16041.29791 | 103.0272924 |
| LYSAM      | 38.749<br>6  | 26321.80499 | 679.2793988 | 26321.80499 | 679.2793988 |

|             |              |             |             |             |             |
|-------------|--------------|-------------|-------------|-------------|-------------|
| DHAD1       | 131.06<br>31 | 1512000     | 11536.42787 | 1512000     | 11536.42787 |
| IPPMla      | 72.369<br>3  | 11963.94288 | 165.3179301 | 11963.94288 | 165.3179301 |
| G3PD7       | 148.42<br>35 | 97058.71559 | 653.9309179 | 97058.71559 | 653.9309179 |
| NADH9_num1  | 40.34        | 10293.42646 | 255.1667441 | 10293.42646 | 255.1667441 |
| NADH9_num2  | 47.358<br>7  | 10293.42646 | 217.3502748 | 10293.42646 | 217.3502748 |
| NADH9_num3  | 83.382<br>2  | 10293.42646 | 123.4487272 | 10293.42646 | 123.4487272 |
| NADH9_num4  | 40.751<br>1  | 10293.42646 | 252.5926038 | 10293.42646 | 252.5926038 |
| NADH10_num1 | 40.34        | 21675.04155 | 537.3089131 | 21675.04155 | 537.3089131 |
| NADH10_num2 | 47.358<br>7  | 21675.04155 | 457.6781363 | 21675.04155 | 457.6781363 |
| NADH10_num3 | 40.751<br>1  | 21675.04155 | 531.8885025 | 21675.04155 | 531.8885025 |
| NADH10_num4 | 83.382<br>2  | 21675.04155 | 259.9480651 | 21675.04155 | 259.9480651 |
| MDH         | 64.674<br>6  | 25920       | 400.775575  | 25920       | 400.775575  |
| FUM_num1    | 120.21<br>06 | 104334.9147 | 867.9343976 | 104334.9147 | 867.9343976 |
| FUM_num2    | 120.59<br>72 | 104334.9147 | 865.1520491 | 104334.9147 | 865.1520491 |
| FUM_num3    | 201.95<br>55 | 104334.9147 | 516.6232893 | 104334.9147 | 516.6232893 |
| PYDXNK      | 61.694<br>8  | 9300.850736 | 150.7558293 | 9300.850736 | 150.7558293 |
| PYAM5PO     | 51.090<br>3  | 9300.846143 | 182.0472016 | 9300.846143 | 182.0472016 |
| OHPBAT      | 79.566<br>6  | 3.6         | 0.045245115 | 3.6         | 0.045245115 |
| GLUTRR      | 92.613<br>6  | 9680.98199  | 104.5308895 | 9680.98199  | 104.5308895 |
| GLCS1       | 52.822<br>4  | 12943.08398 | 245.030214  | 12943.08398 | 245.030214  |
| GLCP_num1   | 186.34<br>51 | 26911.79951 | 144.4191423 | 26911.79951 | 144.4191423 |
| GLCP_num2   | 181.04<br>48 | 26911.79951 | 148.647183  | 26911.79951 | 148.647183  |
| HEMEOS      | 32.248       | 10296.6826  | 319.2918305 | 10296.6826  | 319.2918305 |

|              |              |             |             |             |             |
|--------------|--------------|-------------|-------------|-------------|-------------|
|              | 5            |             |             |             |             |
| ADMDC        | 30.384<br>6  | 99039.6036  | 3259.532908 | 99039.6036  | 3259.532908 |
| AGMT         | 67.114<br>1  | 34948.09724 | 520.726602  | 34948.09724 | 520.726602  |
| ARGDC        | 844.25<br>24 | 10396.28729 | 12.31419335 | 10396.28729 | 12.31419335 |
| ARGSS        | 199.59<br>36 | 10080       | 50.50262133 | 10080       | 50.50262133 |
| AGPR         | 35.952<br>1  | 27140.71295 | 754.9131469 | 27140.71295 | 754.9131469 |
| SPMS         | 64.642<br>8  | 20729.78166 | 320.6819888 | 20729.78166 | 320.6819888 |
| G1SAT        | 90.732<br>2  | 324         | 3.570948351 | 324         | 3.570948351 |
| KDOCT2       | 27.614<br>4  | 15120       | 547.5404137 | 15120       | 547.5404137 |
| OAADC        | 66.852<br>1  | 17454.56417 | 261.0922344 | 17454.56417 | 261.0922344 |
| MNNH         | 44.838       | 54841.49543 | 1223.103069 | 54841.49543 | 1223.103069 |
| ALTRH        | 54.093<br>1  | 69858.52128 | 1291.449765 | 69858.52128 | 1291.449765 |
| GUI1         | 53.987<br>2  | 86159.1663  | 1595.918408 | 86159.1663  | 1595.918408 |
| PGAMT        | 47.543<br>6  | 36035.4739  | 757.9458412 | 36035.4739  | 757.9458412 |
| UAGDP        | 147.57<br>02 | 57600       | 390.3227074 | 57600       | 390.3227074 |
| UAGCVT       | 44.817<br>6  | 11880       | 265.074435  | 11880       | 265.074435  |
| GLUR         | 31.002       | 88419.50993 | 2852.058252 | 88419.50993 | 2852.058252 |
| UAG2E        | 84.489<br>2  | 57209.15714 | 677.1179884 | 57209.15714 | 677.1179884 |
| MACPD        | 85.226<br>6  | 17858.85608 | 209.5455653 | 17858.85608 | 209.5455653 |
| DMQMT        | 53.110<br>9  | 22755.67142 | 428.4557674 | 22755.67142 | 428.4557674 |
| ICHORS_copy1 | 42.931<br>6  | 50074.22462 | 1166.372197 | 50074.22462 | 1166.372197 |
| HACD5_num1   | 159.18<br>78 | 40209.19967 | 252.5897064 | 40209.19967 | 252.5897064 |
| HACD5_num2   | 77.072<br>2  | 40209.19967 | 521.7082121 | 40209.19967 | 521.7082121 |

|             |              |             |             |             |             |
|-------------|--------------|-------------|-------------|-------------|-------------|
| HPPK2       | 18.078<br>8  | 576         | 31.86052172 | 576         | 31.86052172 |
| PTPATi      | 107.01<br>98 | 1980        | 18.5012493  | 1980        | 18.5012493  |
| HEX7        | 32.499<br>8  | 31530.95853 | 970.1893098 | 31530.95853 | 970.1893098 |
| DXPRIi      | 86.776       | 11880       | 136.9042131 | 11880       | 136.9042131 |
| OPHBDC      | 333.62<br>25 | 9504.978952 | 28.49022159 | 9504.978952 | 28.49022159 |
| OHPHM       | 53.110<br>9  | 24071.53907 | 453.2316166 | 24071.53907 | 453.2316166 |
| GHMT2r      | 90.633<br>2  | 11520       | 127.1057405 | 3596400     | 39680.82336 |
| DHORD2      | 36.774<br>5  | 72000       | 1957.878421 | 72000       | 1957.878421 |
| ADK4        | 23.586       | 9420.738358 | 399.4207732 | 9420.738358 | 399.4207732 |
| INSK        | 96.897<br>6  | 38426.53993 | 396.5685418 | 38426.53993 | 396.5685418 |
| ABTA_num1   | 91.549<br>3  | 33853.97349 | 369.7895395 | 33853.97349 | 369.7895395 |
| ABTA_num2   | 44.729<br>1  | 33853.97349 | 756.8668605 | 33853.97349 | 756.8668605 |
| SSALx       | 99.435<br>7  | 21752.97002 | 218.7641865 | 21752.97002 | 218.7641865 |
| ASPT        | 209.42<br>45 | 20574.12224 | 98.24123843 | 20574.12224 | 98.24123843 |
| SERD_L_num1 | 211.09<br>38 | 78829.0727  | 373.4314921 | 78829.0727  | 373.4314921 |
| SERD_L_num2 | 48.906<br>6  | 78829.0727  | 1611.828929 | 78829.0727  | 1611.828929 |
| SERD_L_num3 | 97.043<br>3  | 78829.0727  | 812.3082449 | 78829.0727  | 812.3082449 |
| SERD_L_num4 | 48.752<br>9  | 78829.0727  | 1616.910434 | 78829.0727  | 1616.910434 |
| SERD_L_num5 | 140.92<br>96 | 78829.0727  | 559.3507163 | 78829.0727  | 559.3507163 |
| THRD_num1   | 148.95<br>62 | 74588.90951 | 500.7439067 | 74588.90951 | 500.7439067 |
| THRD_num2   | 40.351<br>3  | 74588.90951 | 1848.488388 | 74588.90951 | 1848.488388 |
| KARA1       | 216.27<br>61 | 15966.4598  | 73.82442999 | 15966.4598  | 73.82442999 |
| KARA2       | 216.27       | 2700        | 12.48404239 | 281880      | 1303.334025 |

|              |              |             |             |             |             |
|--------------|--------------|-------------|-------------|-------------|-------------|
|              | 61           |             |             |             |             |
| ACCOAC       | 252.45<br>56 | 28564.88644 | 113.1481593 | 132480      | 524.7655429 |
| NADK         | 195.39<br>83 | 3960        | 20.2662971  | 3960        | 20.2662971  |
| ICHORS_copy2 | 97.529<br>1  | 24753.81242 | 253.8095032 | 24753.81242 | 253.8095032 |
| SUCBZS       | 35.476<br>6  | 25537.98661 | 719.8544001 | 25537.98661 | 719.8544001 |
| DHBD         | 104.99<br>86 | 14589.98073 | 138.9540502 | 14589.98073 | 138.9540502 |
| ICHORT       | 32.554<br>3  | 13917.92539 | 427.529555  | 13917.92539 | 427.529555  |
| RBK_L1       | 122.17<br>88 | 26478.88451 | 216.7224143 | 26478.88451 | 216.7224143 |
| RBP4E_num1   | 25.277<br>7  | 84320.75084 | 3335.776231 | 84320.75084 | 3335.776231 |
| RBP4E_num2   | 102.07<br>56 | 84320.75084 | 826.0617703 | 84320.75084 | 826.0617703 |
| RBP4E_num3   | 25.560<br>9  | 84320.75084 | 3298.817759 | 84320.75084 | 3298.817759 |
| NTD2_num1    | 25.300<br>6  | 9722.766341 | 384.2899513 | 9722.766341 | 384.2899513 |
| NTD2_num2    | 26.900<br>4  | 9722.766341 | 361.4357534 | 9722.766341 | 361.4357534 |
| NTD2_num3    | 27.163<br>1  | 9722.766341 | 357.9402329 | 9722.766341 | 357.9402329 |
| NTD4_num1    | 26.900<br>4  | 25068.67115 | 931.9070034 | 25068.67115 | 931.9070034 |
| NTD4_num2    | 27.163<br>1  | 25068.67115 | 922.8943366 | 25068.67115 | 922.8943366 |
| NTD5_num1    | 45.416<br>1  | 10199.23647 | 224.5731463 | 10199.23647 | 224.5731463 |
| NTD5_num2    | 26.900<br>4  | 10199.23647 | 379.1481343 | 10199.23647 | 379.1481343 |
| NTD5_num3    | 25.300<br>6  | 10199.23647 | 403.1223161 | 10199.23647 | 403.1223161 |
| NTD5_num4    | 20.255<br>4  | 10199.23647 | 503.5317235 | 10199.23647 | 503.5317235 |
| NTD6_num1    | 45.416<br>1  | 14096.05511 | 310.3757282 | 14096.05511 | 310.3757282 |
| NTD6_num2    | 26.900<br>4  | 14096.05511 | 524.0091266 | 14096.05511 | 524.0091266 |

|              |              |             |             |             |             |
|--------------|--------------|-------------|-------------|-------------|-------------|
| NTD6_num3    | 20.255<br>4  | 14096.05511 | 695.9159094 | 14096.05511 | 695.9159094 |
| LGTHL        | 29.839<br>7  | 9557.43858  | 320.2927167 | 9557.43858  | 320.2927167 |
| PYDXPP_num1  | 30.201<br>3  | 29369.90364 | 972.4715042 | 29369.90364 | 972.4715042 |
| PYDXPP_num2  | 30.370<br>9  | 29369.90364 | 967.0409386 | 29369.90364 | 967.0409386 |
| PYDXPP_num3  | 29.707<br>7  | 29369.90364 | 988.6293332 | 29369.90364 | 988.6293332 |
| PYDXPP_num4  | 27.163<br>1  | 29369.90364 | 1081.242702 | 29369.90364 | 1081.242702 |
| PDXPP        | 30.201<br>3  | 22698.00031 | 751.5570624 | 22698.00031 | 751.5570624 |
| HACD6_num1   | 159.18<br>78 | 31487.30375 | 197.7997293 | 31487.30375 | 197.7997293 |
| HACD6_num2   | 77.072<br>2  | 31487.30375 | 408.5429474 | 31487.30375 | 408.5429474 |
| ECOA1H1_num1 | 77.072<br>2  | 43149.26455 | 559.8551041 | 43149.26455 | 559.8551041 |
| ECOA1H1_num2 | 159.18<br>78 | 43149.26455 | 271.058866  | 43149.26455 | 271.058866  |
| ECOA1H2_num1 | 77.072<br>2  | 48500.51292 | 629.2867327 | 48500.51292 | 629.2867327 |
| ECOA1H2_num2 | 159.18<br>78 | 48500.51292 | 304.6748113 | 48500.51292 | 304.6748113 |
| ECOA1H3_num1 | 77.072<br>2  | 44125.78766 | 572.525342  | 44125.78766 | 572.525342  |
| ECOA1H3_num2 | 159.18<br>78 | 44125.78766 | 277.1932753 | 44125.78766 | 277.1932753 |
| UGLT         | 79.291<br>4  | 67891.37389 | 856.2261972 | 67891.37389 | 856.2261972 |
| DXPS         | 135.23<br>39 | 3960        | 29.28259852 | 3960        | 29.28259852 |
| CDPMEK       | 61.850<br>7  | 4680        | 75.66607977 | 4680        | 75.66607977 |
| MECDPS       | 50.692<br>6  | 324         | 6.391465421 | 324         | 6.391465421 |
| DDGLK        | 33.962<br>4  | 171581.3307 | 5052.096752 | 171581.3307 | 5052.096752 |
| XYLI2        | 198.96<br>8  | 37166.12269 | 186.7944729 | 37166.12269 | 186.7944729 |
| PMANM        | 50.462<br>6  | 28985.11675 | 574.3880964 | 28985.11675 | 574.3880964 |

|             |               |             |             |             |             |
|-------------|---------------|-------------|-------------|-------------|-------------|
| ICL         | 190.08<br>63  | 58476.22074 | 307.6298541 | 58476.22074 | 307.6298541 |
| GLYCL       | 364.08<br>76  | 36542.3134  | 100.3668167 | 36542.3134  | 100.3668167 |
| HCYSMT      | 33.422<br>8   | 39542.54746 | 1183.100981 | 39542.54746 | 1183.100981 |
| UDPG4E      | 74.530<br>2   | 13617.81289 | 182.7153677 | 13617.81289 | 182.7153677 |
| LACZ        | 465.93<br>14  | 74153.44238 | 159.1509874 | 74153.44238 | 159.1509874 |
| TRE6PH      | 63.837<br>7   | 31368.07446 | 491.3722528 | 31368.07446 | 491.3722528 |
| XYLI1       | 198.96<br>8   | 23950.64821 | 120.3743728 | 23950.64821 | 120.3743728 |
| PPC         | 396.25<br>04  | 165600      | 417.9175592 | 3596400     | 9076.079166 |
| G3PT_num1   | 30.412<br>8   | 9873.825329 | 324.6601868 | 9873.825329 | 324.6601868 |
| G3PT_num2   | 27.163<br>1   | 9873.825329 | 363.5014166 | 9873.825329 | 363.5014166 |
| CINND0      | 126.99<br>54  | 34531.83732 | 271.9140797 | 34531.83732 | 271.9140797 |
| DHPPD       | 28.499<br>6   | 16735.64013 | 587.2236848 | 16735.64013 | 587.2236848 |
| DHCIND      | 28.499<br>6   | 14890.46441 | 522.4797684 | 14890.46441 | 522.4797684 |
| CITL        | 614.10<br>03  | 144633.9099 | 235.5216401 | 144633.9099 | 235.5216401 |
| GOFUCR      | 72.282<br>3   | 10022.30239 | 138.6550012 | 10022.30239 | 138.6550012 |
| PYDXK_num1  | 61.694<br>8   | 9301.044856 | 150.7589757 | 9301.044856 | 150.7589757 |
| PYDXK_num2  | 62.644<br>4   | 9301.044856 | 148.4736841 | 9301.044856 | 148.4736841 |
| GTPCII2     | 43.672        | 432         | 9.891921597 | 432         | 9.891921597 |
| SADT2       | 350.98<br>71  | 102441.8063 | 291.8677247 | 102441.8063 | 291.8677247 |
| LCARS       | 81.026<br>7   | 12525.20682 | 154.5812285 | 12525.20682 | 154.5812285 |
| ALCD19_num1 | 141.51<br>83  | 66988.94494 | 473.3588867 | 66988.94494 | 473.3588867 |
| ALCD19_num2 | 3845.0<br>896 | 66988.94494 | 17.42194641 | 66988.94494 | 17.42194641 |

|            |              |             |             |             |             |
|------------|--------------|-------------|-------------|-------------|-------------|
| RMPA       | 120.58<br>2  | 25917.542   | 214.9370719 | 25917.542   | 214.9370719 |
| SBTPD      | 111.43<br>15 | 16357.75901 | 146.7965433 | 16357.75901 | 146.7965433 |
| PFK_2      | 139.36<br>82 | 28729.97065 | 206.1443762 | 28729.97065 | 206.1443762 |
| GLTPD      | 74.780<br>3  | 22429.04508 | 299.9325368 | 22429.04508 | 299.9325368 |
| TGBPA_num1 | 172.36<br>71 | 31362.76788 | 181.9533303 | 31362.76788 | 181.9533303 |
| TGBPA_num2 | 77.920<br>6  | 31362.76788 | 402.4964885 | 31362.76788 | 402.4964885 |
| MANAO      | 53.580<br>2  | 42550.17941 | 794.1399884 | 42550.17941 | 794.1399884 |
| TAGURr     | 54.808<br>3  | 28666.34973 | 523.0293538 | 28666.34973 | 523.0293538 |
| PGLYCP     | 27.389<br>2  | 10590.84588 | 386.6796359 | 10590.84588 | 386.6796359 |
| GLXCL      | 129.46<br>35 | 50871.83922 | 392.9434877 | 50871.83922 | 392.9434877 |
| TARTD      | 110.82<br>6  | 40271.4679  | 363.3756329 | 40271.4679  | 363.3756329 |
| GLCRAL     | 164.30<br>5  | 24765.1176  | 150.7265001 | 24765.1176  | 150.7265001 |
| KAS14_num1 | 85.226<br>6  | 9362.983381 | 109.8598722 | 9362.983381 | 109.8598722 |
| KAS14_num2 | 86.091<br>5  | 9362.983381 | 108.7561883 | 9362.983381 | 108.7561883 |
| EDTXS1     | 35.406<br>8  | 12691.75649 | 358.4553387 | 12691.75649 | 358.4553387 |
| EDTXS2     | 37.410<br>4  | 22707.38756 | 606.980614  | 22707.38756 | 606.980614  |
| EDTXS3     | 35.493<br>4  | 16672.68023 | 469.7402963 | 16672.68023 | 469.7402963 |
| EDTXS4     | 37.410<br>4  | 63673.51745 | 1702.027176 | 63673.51745 | 1702.027176 |
| NNDPR      | 65.524<br>1  | 1656        | 25.27314377 | 1656        | 25.27314377 |
| HACD4_num1 | 159.18<br>78 | 38552.38416 | 242.1817762 | 38552.38416 | 242.1817762 |
| HACD4_num2 | 77.072<br>2  | 38552.38416 | 500.2112845 | 38552.38416 | 500.2112845 |
| HACD7_num1 | 77.072<br>2  | 34363.09202 | 445.8558601 | 34363.09202 | 445.8558601 |

|             |              |             |             |             |             |
|-------------|--------------|-------------|-------------|-------------|-------------|
| HACD7_num2  | 159.18<br>78 | 34363.09202 | 215.8651104 | 34363.09202 | 215.8651104 |
| AACPS1      | 89.339<br>5  | 9300.085484 | 104.0982486 | 9300.085484 | 104.0982486 |
| SDPDS       | 82.538       | 1540800     | 18667.76515 | 1540800     | 18667.76515 |
| DMSOR1_num1 | 233.04<br>25 | 51527.57551 | 221.1080619 | 51527.57551 | 221.1080619 |
| DMSOR1_num2 | 144.09<br>38 | 51527.57551 | 357.5974505 | 51527.57551 | 357.5974505 |
| DKGLCNR2y   | 70.791       | 17120.40057 | 241.8443103 | 17120.40057 | 241.8443103 |
| 2DGULRy     | 70.791       | 19562.41623 | 276.340442  | 19562.41623 | 276.340442  |
| RZ5PP       | 23.308<br>5  | 14207.16538 | 609.5272273 | 14207.16538 | 609.5272273 |
| NTD9_num1   | 20.255<br>4  | 9725.196348 | 480.1285755 | 9725.196348 | 480.1285755 |
| NTD9_num2   | 26.900<br>4  | 9725.196348 | 361.5260869 | 9725.196348 | 361.5260869 |
| NTD9_num3   | 25.398<br>8  | 9725.196348 | 382.8998357 | 9725.196348 | 382.8998357 |
| NTD9_num4   | 27.163<br>1  | 9725.196348 | 358.0296928 | 9725.196348 | 358.0296928 |
| NTD10       | 26.900<br>4  | 9327.137796 | 346.7285912 | 9327.137796 | 346.7285912 |
| ADPT        | 39.717<br>8  | 10116.3237  | 254.7050365 | 10116.3237  | 254.7050365 |
| ADK1        | 23.586       | 111600      | 4731.620453 | 111600      | 4731.620453 |
| OCTDPS      | 70.433<br>9  | 1080        | 15.33352548 | 1080        | 15.33352548 |
| AACPS2      | 89.339<br>5  | 9300.082612 | 104.0982165 | 9300.082612 | 104.0982165 |
| AACPS3      | 89.339<br>5  | 20818.49733 | 233.0267948 | 20818.49733 | 233.0267948 |
| AACPS4      | 89.339<br>5  | 19801.47101 | 221.6429576 | 19801.47101 | 221.6429576 |
| AMANK       | 29.643<br>9  | 18940.18921 | 638.9236642 | 18940.18921 | 638.9236642 |
| ACNML       | 130.37<br>39 | 22534.19094 | 172.8428078 | 22534.19094 | 172.8428078 |
| CAT_num1    | 336.65<br>04 | 190740.2702 | 566.5826335 | 190740.2702 | 566.5826335 |
| CAT_num2    | 320.09<br>53 | 190740.2702 | 595.8858821 | 190740.2702 | 595.8858821 |
| SERASr      | 141.99       | 58615.06414 | 412.8083057 | 58615.06414 | 412.8083057 |

|             |              |             |             |             |             |
|-------------|--------------|-------------|-------------|-------------|-------------|
|             | 1            |             |             |             |             |
| DMSOR2      | 144.09<br>38 | 94768.54027 | 657.6864534 | 94768.54027 | 657.6864534 |
| ACMAMUT     | 27.928<br>2  | 20034.19254 | 717.3463574 | 20034.19254 | 717.3463574 |
| DDGALK      | 31.373<br>6  | 25598.32552 | 815.9192928 | 25598.32552 | 815.9192928 |
| AB6PGH_num1 | 53.161<br>3  | 42497.06141 | 799.3984611 | 42497.06141 | 799.3984611 |
| AB6PGH_num2 | 55.360<br>8  | 42497.06141 | 767.6381376 | 42497.06141 | 767.6381376 |
| AB6PGH_num3 | 53.934<br>9  | 42497.06141 | 787.9325151 | 42497.06141 | 787.9325151 |
| AMALT1      | 78.503<br>5  | 57278.02975 | 729.623899  | 57278.02975 | 729.623899  |
| MLTP2       | 181.04<br>48 | 27243.36347 | 150.4785747 | 27243.36347 | 150.4785747 |
| PACCOAL     | 48.952<br>9  | 21124.09373 | 431.51874   | 21124.09373 | 431.51874   |
| GP4GH       | 31.296<br>7  | 10828.74747 | 346.0028522 | 10828.74747 | 346.0028522 |
| ACGAMT      | 81.914<br>5  | 10386.84518 | 126.801057  | 10386.84518 | 126.801057  |
| AADDGT      | 40.639<br>6  | 231887.7737 | 5705.956103 | 231887.7737 | 5705.956103 |
| GMHEPK      | 102.10<br>12 | 1502082.994 | 14711.70754 | 1502082.994 | 14711.70754 |
| TRE6PS      | 53.611<br>2  | 26430.17295 | 492.9972272 | 26430.17295 | 492.9972272 |
| UDCPDP_num1 | 29.021<br>3  | 15096.38615 | 520.1829743 | 15096.38615 | 520.1829743 |
| UDCPDP_num2 | 22.398<br>6  | 15096.38615 | 673.9879346 | 15096.38615 | 673.9879346 |
| UDCPDP_num3 | 29.758<br>8  | 15096.38615 | 507.2914954 | 15096.38615 | 507.2914954 |
| TREH        | 63.696<br>7  | 19724.51893 | 309.6631211 | 19724.51893 | 309.6631211 |
| CYTK1       | 24.746<br>3  | 86400       | 3491.431042 | 86400       | 3491.431042 |
| CYTK2       | 24.746<br>3  | 25750.10172 | 1040.563709 | 25750.10172 | 1040.563709 |
| GK1         | 47.185<br>4  | 151200      | 3204.381016 | 151200      | 3204.381016 |

|             |              |             |             |             |             |
|-------------|--------------|-------------|-------------|-------------|-------------|
| HACD1_num1  | 159.18<br>78 | 38780.61833 | 243.6155178 | 38780.61833 | 243.6155178 |
| HACD1_num2  | 77.072<br>2  | 38780.61833 | 503.1725879 | 38780.61833 | 503.1725879 |
| HACD2_num1  | 159.18<br>78 | 39035.14214 | 245.214408  | 39035.14214 | 245.214408  |
| HACD2_num2  | 77.072<br>2  | 39035.14214 | 506.4749954 | 39035.14214 | 506.4749954 |
| ACACCT_num1 | 92.971<br>7  | 27123.73889 | 291.7418838 | 27123.73889 | 291.7418838 |
| ACACCT_num2 | 57.562<br>3  | 27123.73889 | 471.206656  | 27123.73889 | 471.206656  |
| BUTCT       | 92.971<br>7  | 46897.97526 | 504.4328033 | 46897.97526 | 504.4328033 |
| 2DGULRx     | 70.791       | 20094.4938  | 283.8566174 | 20094.4938  | 283.8566174 |
| G1PTT_num1  | 130.77<br>42 | 10400.149   | 79.52752914 | 10400.149   | 79.52752914 |
| G1PTT_num2  | 130.93<br>76 | 10400.149   | 79.42828493 | 10400.149   | 79.42828493 |
| TDPGDH_num1 | 39.753<br>8  | 24678.10401 | 620.7734608 | 24678.10401 | 620.7734608 |
| TDPGDH_num2 | 81.116<br>7  | 24678.10401 | 304.2296347 | 24678.10401 | 304.2296347 |
| UDPGALM     | 42.965<br>9  | 651626.1936 | 15166.12462 | 651626.1936 | 15166.12462 |
| TDPDRE      | 21.270<br>1  | 18583.91096 | 873.7105588 | 18583.91096 | 873.7105588 |
| TDPDRR      | 32.694<br>1  | 14288.31244 | 437.0303032 | 14288.31244 | 437.0303032 |
| G3PD6       | 148.42<br>35 | 29478.25323 | 198.6090695 | 29478.25323 | 198.6090695 |
| ALLTN       | 198.40<br>64 | 150250.7634 | 757.2878869 | 150250.7634 | 757.2878869 |
| UAPGR       | 37.851       | 154800      | 4089.720219 | 154800      | 4089.720219 |
| NDPK7_num1  | 23.586       | 9921.020926 | 420.6317699 | 9921.020926 | 420.6317699 |
| NDPK7_num2  | 61.853<br>8  | 9921.020926 | 160.3946876 | 9921.020926 | 160.3946876 |
| GLYAT       | 86.234<br>1  | 10460.27884 | 121.3009568 | 10460.27884 | 121.3009568 |
| ADNUC       | 32.560<br>8  | 45598.68659 | 1400.416654 | 45598.68659 | 1400.416654 |
| GMHEPPA     | 21.294<br>2  | 283427.0473 | 13310.05848 | 283427.0473 | 13310.05848 |

|            |              |             |             |             |             |
|------------|--------------|-------------|-------------|-------------|-------------|
| S7PI       | 83.259       | 32534.6772  | 390.7646885 | 32534.6772  | 390.7646885 |
| TRPS3      | 143.41<br>43 | 35739.90722 | 249.2074167 | 35739.90722 | 249.2074167 |
| CRNBTCT    | 90.253<br>5  | 21541.32361 | 238.6757701 | 21541.32361 | 238.6757701 |
| CRNCBCT    | 90.253<br>5  | 22065.27    | 244.4810451 | 22065.27    | 244.4810451 |
| CRNCDH     | 28.190<br>2  | 39436.11997 | 1398.930124 | 39436.11997 | 1398.930124 |
| FADRx      | 26.242       | 1090800     | 41566.95374 | 1090800     | 41566.95374 |
| GTPDPK     | 83.875<br>6  | 21923.85937 | 261.3854252 | 21923.85937 | 261.3854252 |
| NDPK2_num1 | 23.586       | 24602.14215 | 1043.082428 | 24602.14215 | 1043.082428 |
| NDPK2_num2 | 61.853<br>8  | 24602.14215 | 397.7466566 | 24602.14215 | 397.7466566 |
| NDPK3_num1 | 61.853<br>8  | 17317.19681 | 279.9698129 | 17317.19681 | 279.9698129 |
| NDPK3_num2 | 23.586       | 17317.19681 | 734.2150773 | 17317.19681 | 734.2150773 |
| NDPK4_num1 | 23.586       | 12739.59929 | 540.1339477 | 12739.59929 | 540.1339477 |
| NDPK4_num2 | 61.853<br>8  | 12739.59929 | 205.9630822 | 12739.59929 | 205.9630822 |
| FCLT_num1  | 33.052<br>3  | 9524.036689 | 288.1504975 | 9524.036689 | 288.1504975 |
| FCLT_num2  | 35.884<br>4  | 9524.036689 | 265.4088319 | 9524.036689 | 265.4088319 |
| FCLT_num3  | 93.508<br>4  | 9524.036689 | 101.8522046 | 9524.036689 | 101.8522046 |
| HBZOPT     | 32.511<br>8  | 9461.03602  | 291.0031441 | 9461.03602  | 291.0031441 |
| PNTK       | 72.719<br>6  | 972         | 13.36641016 | 972         | 13.36641016 |
| DPCOAK     | 22.621<br>7  | 2304        | 101.8491095 | 2304        | 101.8491095 |
| HETZK      | 54.678<br>3  | 11542.76602 | 211.1032351 | 11542.76602 | 211.1032351 |
| KDOPS      | 123.33<br>08 | 2592        | 21.01664791 | 2592        | 21.01664791 |
| KDOPP      | 79.988<br>4  | 36000       | 450.0652595 | 36000       | 450.0652595 |
| AST        | 38.455<br>9  | 24033.07158 | 624.9514789 | 24033.07158 | 624.9514789 |
| SGDS       | 35.800<br>2  | 76498.5343  | 2136.818629 | 76498.5343  | 2136.818629 |

|             |              |             |             |             |             |
|-------------|--------------|-------------|-------------|-------------|-------------|
| CYNTAH      | 170.48<br>84 | 18024.11929 | 105.7205023 | 18024.11929 | 105.7205023 |
| GSPMDA      | 141.06<br>39 | 57857.65322 | 410.1520887 | 57857.65322 | 410.1520887 |
| GSPMDS      | 141.06<br>39 | 48666.39977 | 344.9954224 | 48666.39977 | 344.9954224 |
| GUAD        | 50.244<br>2  | 142271.6549 | 2831.603546 | 142271.6549 | 2831.603546 |
| TMAOR1_num1 | 144.09<br>38 | 100063.9026 | 694.4358644 | 100063.9026 | 694.4358644 |
| TMAOR1_num2 | 233.04<br>25 | 100063.9026 | 429.3804888 | 100063.9026 | 429.3804888 |
| TMAOR2      | 144.09<br>38 | 42205.22924 | 292.9010772 | 42205.22924 | 292.9010772 |
| DGK1        | 47.185<br>4  | 9898.287581 | 209.7743705 | 9898.287581 | 209.7743705 |
| DTMPK       | 23.783<br>1  | 64800       | 2724.623787 | 64800       | 2724.623787 |
| NDPK1_num1  | 23.586       | 22045.90831 | 934.7031422 | 22045.90831 | 934.7031422 |
| NDPK1_num2  | 61.853<br>8  | 22045.90831 | 356.4196268 | 22045.90831 | 356.4196268 |
| TRDR_num1   | 81.052<br>7  | 36024.44087 | 444.4570121 | 36024.44087 | 444.4570121 |
| TRDR_num2   | 84.800<br>8  | 36024.44087 | 424.812512  | 36024.44087 | 424.812512  |
| PGMT_num1   | 58.361       | 111558.8515 | 1911.530842 | 111558.8515 | 1911.530842 |
| PGMT_num2   | 20.779<br>8  | 111558.8515 | 5368.620078 | 111558.8515 | 5368.620078 |
| PGMT_num3   | 23.564<br>9  | 111558.8515 | 4734.110966 | 111558.8515 | 4734.110966 |
| FRUK        | 67.511<br>4  | 65166.15067 | 965.2614325 | 65166.15067 | 965.2614325 |
| RHCCE       | 19.416<br>2  | 10.8        | 0.556236545 | 10.8        | 0.556236545 |
| KG6PDC_num1 | 47.156<br>2  | 21707.18087 | 460.3250658 | 21707.18087 | 460.3250658 |
| KG6PDC_num2 | 23.444<br>8  | 21707.18087 | 925.8846681 | 21707.18087 | 925.8846681 |
| X5PL3E_num1 | 32.006<br>6  | 240986.0357 | 7529.260705 | 240986.0357 | 7529.260705 |
| X5PL3E_num2 | 32.455<br>2  | 240986.0357 | 7425.190284 | 240986.0357 | 7425.190284 |
| DOGULNR     | 73.145       | 22733.58578 | 310.7999379 | 22733.58578 | 310.7999379 |

|                      |              |             |             |             |             |
|----------------------|--------------|-------------|-------------|-------------|-------------|
|                      | 4            |             |             |             |             |
| BETALDHx             | 211.64<br>45 | 18043.37702 | 85.25322897 | 18043.37702 | 85.25322897 |
| BETALDH <sub>y</sub> | 211.64<br>45 | 21034.4954  | 99.38597696 | 21034.4954  | 99.38597696 |
| MLTG3                | 69.041       | 48889.46887 | 708.1222588 | 48889.46887 | 708.1222588 |
| DKGLCNR1_num<br>1    | 31.109<br>6  | 10057.9245  | 323.3061338 | 10057.9245  | 323.3061338 |
| DKGLCNR1_num<br>2    | 29.436<br>8  | 10057.9245  | 341.6785962 | 10057.9245  | 341.6785962 |
| NADTRHD              | 412.48<br>31 | 94594.50652 | 229.3294114 | 94594.50652 | 229.3294114 |
| FMNRx2_num1          | 42.506<br>7  | 17654.45437 | 415.3334504 | 17654.45437 | 415.3334504 |
| FMNRx2_num2          | 26.242       | 17654.45437 | 672.7556731 | 17654.45437 | 672.7556731 |
| FMNRx2_num3          | 530.15<br>87 | 17654.45437 | 33.30032003 | 17654.45437 | 33.30032003 |
| ACPS1_num1           | 28.104<br>6  | 21613.67893 | 769.0441755 | 21613.67893 | 769.0441755 |
| ACPS1_num2           | 21.767<br>8  | 21613.67893 | 992.9197684 | 21613.67893 | 992.9197684 |
| GMPS2                | 117.35<br>84 | 18000       | 153.3763241 | 18000       | 153.3763241 |
| AMPN                 | 323.96<br>95 | 22311.57137 | 68.86935766 | 22311.57137 | 68.86935766 |
| GSNK                 | 96.897<br>6  | 69004.44076 | 712.1377697 | 69004.44076 | 712.1377697 |
| ADCS                 | 71.741<br>4  | 9527.577685 | 132.8044572 | 9527.577685 | 132.8044572 |
| ADCL_num1            | 59.430<br>1  | 5040        | 84.80551101 | 5040        | 84.80551101 |
| ADCL_num2            | 18.776<br>9  | 5040        | 268.4149141 | 5040        | 268.4149141 |
| DHAPT                | 360.83<br>42 | 81935.07541 | 227.0712571 | 81935.07541 | 227.0712571 |
| UMPK_num1            | 24.746<br>3  | 42025.02012 | 1698.234488 | 42025.02012 | 1698.234488 |
| UMPK_num2            | 155.82<br>16 | 42025.02012 | 269.6995803 | 42025.02012 | 269.6995803 |
| DDPGALA              | 21.390<br>6  | 25821.72449 | 1207.152884 | 25821.72449 | 1207.152884 |
| DURIK1               | 23.456<br>6  | 13012.21128 | 554.7356087 | 13012.21128 | 554.7356087 |

|                   |              |             |             |             |             |
|-------------------|--------------|-------------|-------------|-------------|-------------|
| UPPRT             | 67.599<br>8  | 10152.73567 | 150.1888418 | 10152.73567 | 150.1888418 |
| CTPS2             | 241.49<br>66 | 39600       | 163.9774639 | 39600       | 163.9774639 |
| NTD1_num1         | 45.416<br>1  | 18381.74158 | 404.7406443 | 18381.74158 | 404.7406443 |
| NTD1_num2         | 26.900<br>4  | 18381.74158 | 683.3259571 | 18381.74158 | 683.3259571 |
| NTD1_num3         | 25.300<br>6  | 18381.74158 | 726.5338204 | 18381.74158 | 726.5338204 |
| NTD1_num4         | 20.255<br>4  | 18381.74158 | 907.4983252 | 18381.74158 | 907.4983252 |
| NTD7_num1         | 25.398<br>8  | 9716.829343 | 382.5704105 | 9716.829343 | 382.5704105 |
| NTD7_num2         | 26.900<br>4  | 9716.829343 | 361.2150505 | 9716.829343 | 361.2150505 |
| NTD7_num3         | 20.255<br>4  | 9716.829343 | 479.7155002 | 9716.829343 | 479.7155002 |
| NTD7_num4         | 27.163<br>1  | 9716.829343 | 357.7216644 | 9716.829343 | 357.7216644 |
| PAPPT3            | 39.874<br>8  | 252000      | 6319.780914 | 252000      | 6319.780914 |
| UAGPT3            | 37.814<br>7  | 61200       | 1618.418234 | 61200       | 1618.418234 |
| F6PA_num1         | 229.96<br>82 | 67194.11527 | 292.1887255 | 67194.11527 | 292.1887255 |
| F6PA_num2         | 23.555<br>2  | 67194.11527 | 2852.623424 | 67194.11527 | 2852.623424 |
| AGMHE             | 174.46<br>58 | 38346.39454 | 219.7931889 | 38346.39454 | 219.7931889 |
| GMHEPAT           | 102.10<br>12 | 348334.2784 | 3411.657046 | 348334.2784 | 3411.657046 |
| IDOND             | 37.146<br>6  | 19621.3609  | 528.2141812 | 19621.3609  | 528.2141812 |
| IDOND2            | 37.146<br>6  | 9973.965222 | 268.5027761 | 9973.965222 | 268.5027761 |
| GLYCLTDx_num<br>1 | 70.791       | 20514.68636 | 289.792295  | 20514.68636 | 289.792295  |
| GLYCLTDx_num<br>2 | 35.343<br>4  | 20514.68636 | 580.4389605 | 20514.68636 | 580.4389605 |
| HPYRRy_num1       | 35.343<br>4  | 9598.25048  | 271.5712263 | 9598.25048  | 271.5712263 |
| HPYRRy_num2       | 70.791       | 9598.25048  | 135.5857451 | 9598.25048  | 135.5857451 |

|            |              |             |             |             |             |
|------------|--------------|-------------|-------------|-------------|-------------|
| ACODA      | 84.694<br>7  | 93600       | 1105.145895 | 93600       | 1105.145895 |
| ADA        | 36.397<br>5  | 38158.03206 | 1048.369587 | 38158.03206 | 1048.369587 |
| DADA       | 36.397<br>5  | 37137.1001  | 1020.32008  | 37137.1001  | 1020.32008  |
| ADD        | 127.47<br>87 | 96905.20187 | 760.1677917 | 96905.20187 | 760.1677917 |
| ADSS       | 94.689<br>9  | 11880       | 125.4621665 | 11880       | 125.4621665 |
| AGDC       | 163.79<br>64 | 112916.4612 | 689.3708358 | 112916.4612 | 689.3708358 |
| ASNN_num1  | 148.50<br>9  | 12284.90508 | 82.7216201  | 12284.90508 | 82.7216201  |
| ASNN_num2  | 33.394       | 12284.90508 | 367.8776151 | 12284.90508 | 367.8776151 |
| ASNS2_num1 | 73.301<br>1  | 68400       | 933.137429  | 68400       | 933.137429  |
| ASNS2_num2 | 125.31<br>8  | 68400       | 545.8114557 | 68400       | 545.8114557 |
| ASPCT_num1 | 309.28<br>79 | 34791.89775 | 112.4903294 | 34791.89775 | 112.4903294 |
| ASPCT_num2 | 206.56<br>42 | 34791.89775 | 168.4314017 | 34791.89775 | 168.4314017 |
| DMPPS      | 69.549<br>1  | 396         | 5.693819187 | 396         | 5.693819187 |
| MCOATA     | 41.056<br>7  | 17706.54298 | 431.2704864 | 17706.54298 | 431.2704864 |
| IPDPS      | 69.549<br>1  | 3096        | 44.51531364 | 3096        | 44.51531364 |
| DAPE       | 60.417<br>1  | 302400      | 5005.20548  | 302400      | 5005.20548  |
| DHDPRy     | 115.02<br>64 | 50400       | 438.1602832 | 50400       | 438.1602832 |
| HSK        | 67.247<br>3  | 291600      | 4336.233574 | 291600      | 4336.233574 |
| SDPTA_num1 | 91.549<br>3  | 17299.46712 | 188.9634013 | 17299.46712 | 188.9634013 |
| SDPTA_num2 | 44.729<br>1  | 17299.46712 | 386.7609032 | 17299.46712 | 386.7609032 |
| SDPTA_num3 | 87.533<br>9  | 17299.46712 | 197.6316275 | 17299.46712 | 197.6316275 |
| SDPTA_num4 | 87.330<br>7  | 17299.46712 | 198.0914743 | 17299.46712 | 198.0914743 |

|             |              |             |             |             |             |
|-------------|--------------|-------------|-------------|-------------|-------------|
| SDPTA_num5  | 79.566<br>6  | 17299.46712 | 217.4212184 | 17299.46712 | 217.4212184 |
| THRS        | 47.113<br>8  | 14400       | 305.6429326 | 14400       | 305.6429326 |
| HSST        | 71.454<br>6  | 28800       | 403.0531274 | 28800       | 403.0531274 |
| PPNDH       | 86.222<br>7  | 43200       | 501.0281515 | 43200       | 501.0281515 |
| DDPA_num1   | 152.03<br>81 | 140719.9588 | 925.5572045 | 140719.9588 | 925.5572045 |
| DDPA_num2   | 77.607<br>9  | 140719.9588 | 1813.216938 | 140719.9588 | 1813.216938 |
| DDPA_num3   | 77.470<br>1  | 140719.9588 | 1816.442199 | 140719.9588 | 1816.442199 |
| NMNDA       | 35.163<br>4  | 23640.84149 | 672.3138686 | 23640.84149 | 672.3138686 |
| NNAM        | 23.362       | 11380.49961 | 487.1372148 | 11380.49961 | 487.1372148 |
| P5CD        | 287.63<br>03 | 176721.467  | 614.4049046 | 176721.467  | 614.4049046 |
| SPMDAT1     | 87.548       | 32401.65086 | 370.1015541 | 32401.65086 | 370.1015541 |
| SPMDAT2     | 87.548       | 18678.29696 | 213.3492136 | 18678.29696 | 213.3492136 |
| TDPADGAT    | 24.220<br>4  | 27137.47252 | 1120.43866  | 27137.47252 | 1120.43866  |
| MALS_num1   | 60.273<br>6  | 84473.14158 | 1401.494876 | 84473.14158 | 1401.494876 |
| MALS_num2   | 80.488<br>5  | 84473.14158 | 1049.505725 | 84473.14158 | 1049.505725 |
| TRE6PP      | 29.175<br>3  | 9577.301641 | 328.2674605 | 9577.301641 | 328.2674605 |
| ADPRDP_num1 | 42.306<br>3  | 13031.08768 | 308.0176637 | 13031.08768 | 308.0176637 |
| ADPRDP_num2 | 47.333<br>6  | 13031.08768 | 275.3031184 | 13031.08768 | 275.3031184 |
| ARAI        | 336.44<br>39 | 46557.9562  | 138.3825244 | 46557.9562  | 138.3825244 |
| M1PD        | 41.139       | 21414.05704 | 520.5293526 | 21414.05704 | 520.5293526 |
| G3PD2       | 72.723<br>2  | 68644.24348 | 943.9112068 | 68644.24348 | 943.9112068 |
| GALS3       | 101.31<br>41 | 27314.25764 | 269.5997659 | 27314.25764 | 269.5997659 |
| FCI         | 389.86       | 38459.23614 | 98.6488384  | 38459.23614 | 98.6488384  |
| FCLK        | 52.258<br>7  | 68205.67506 | 1305.154454 | 68205.67506 | 1305.154454 |

|             |              |             |             |             |             |
|-------------|--------------|-------------|-------------|-------------|-------------|
| FCLPA_num1  | 23.222<br>5  | 24648.80337 | 1061.419028 | 24648.80337 | 1061.419028 |
| FCLPA_num2  | 95.101<br>3  | 24648.80337 | 259.1847154 | 24648.80337 | 259.1847154 |
| ACCOAL_num1 | 72.093<br>6  | 16156.30072 | 224.1017332 | 16156.30072 | 224.1017332 |
| ACCOAL_num2 | 69.350<br>9  | 16156.30072 | 232.9645429 | 16156.30072 | 232.9645429 |
| GALUi       | 131.76<br>9  | 10809.57201 | 82.034257   | 10809.57201 | 82.034257   |
| U23GAAT     | 108.11<br>54 | 129600      | 1198.719146 | 129600      | 1198.719146 |
| UAAGDS      | 53.343<br>6  | 28800       | 539.89607   | 28800       | 539.89607   |
| UAMAS       | 107.25<br>19 | 50400       | 469.921745  | 50400       | 469.921745  |
| UAMAGS      | 46.973<br>6  | 104400      | 2222.524993 | 104400      | 2222.524993 |
| UGLYCH      | 18.169<br>6  | 91417.25945 | 5031.330324 | 91417.25945 | 5031.330324 |
| OP4ENH      | 144.44<br>94 | 26173.1843  | 181.1927519 | 26173.1843  | 181.1927519 |
| HOPNTAL     | 36.470<br>4  | 50874.6321  | 1394.95679  | 50874.6321  | 1394.95679  |
| 3HPPPNH     | 62.185<br>7  | 16534.68041 | 265.8920042 | 16534.68041 | 265.8920042 |
| AKGDH       | 2418.3<br>91 | 112697.4534 | 46.60017897 | 3596400     | 1487.104443 |
| HPYRRx_num1 | 35.343<br>4  | 16797.03153 | 475.2522829 | 16797.03153 | 475.2522829 |
| HPYRRx_num2 | 70.791       | 16797.03153 | 237.2763704 | 16797.03153 | 237.2763704 |
| GLYCDx      | 309.69<br>76 | 19473.16795 | 62.87800728 | 19473.16795 | 62.87800728 |
| ASP1DC      | 13.833<br>7  | 252         | 18.21638463 | 252         | 18.21638463 |
| UGMDDS      | 47.447<br>2  | 57600       | 1213.981015 | 57600       | 1213.981015 |
| UHGADA      | 33.955<br>9  | 75600       | 2226.417206 | 75600       | 2226.417206 |
| UAGAAT      | 92.879<br>5  | 17547.89693 | 188.9318625 | 17547.89693 | 188.9318625 |
| ATPPRT      | 66.733<br>4  | 7920        | 118.6812001 | 7920        | 118.6812001 |

|            |              |             |             |             |             |
|------------|--------------|-------------|-------------|-------------|-------------|
| HISTD      | 92.220<br>7  | 11160       | 121.0140457 | 11160       | 121.0140457 |
| IGPDH      | 80.555<br>9  | 13680       | 169.8199635 | 13680       | 169.8199635 |
| PRPPS      | 34.218<br>3  | 28800       | 841.654904  | 28800       | 841.654904  |
| PRATPP     | 22.755<br>8  | 79200       | 3480.431363 | 79200       | 3480.431363 |
| PRMICI     | 26.032<br>6  | 36000       | 1382.881464 | 36000       | 1382.881464 |
| SERAT      | 175.89<br>98 | 136800      | 777.7154948 | 136800      | 777.7154948 |
| CYSS_num1  | 65.328<br>3  | 47534.80306 | 727.6295733 | 47534.80306 | 727.6295733 |
| CYSS_num2  | 68.979<br>3  | 47534.80306 | 689.1169243 | 47534.80306 | 689.1169243 |
| BPNT       | 27.175<br>9  | 79200       | 2914.346903 | 79200       | 2914.346903 |
| PAPSR_num1 | 71.506<br>4  | 32950.32997 | 460.8025291 | 32950.32997 | 460.8025291 |
| PAPSR_num2 | 67.758<br>3  | 32950.32997 | 486.2921586 | 32950.32997 | 486.2921586 |
| ASPK_num1  | 177.77<br>54 | 631361.1827 | 3551.454153 | 631361.1827 | 3551.454153 |
| ASPK_num2  | 356.48<br>1  | 631361.1827 | 1771.093502 | 631361.1827 | 1771.093502 |
| ASPK_num3  | 97.063<br>5  | 631361.1827 | 6504.619993 | 631361.1827 | 6504.619993 |
| ASAD       | 80.035<br>8  | 29917.33841 | 373.7994549 | 29917.33841 | 373.7994549 |
| DAPDC      | 92.354<br>5  | 144000      | 1559.209351 | 144000      | 1559.209351 |
| METAT      | 167.80<br>65 | 21.6        | 0.128719686 | 27000       | 160.8996076 |
| ASCBPL     | 240.36<br>4  | 38846.75555 | 161.6163633 | 38846.75555 | 161.6163633 |
| ACBIPGT    | 40.328       | 9379.708193 | 232.5855037 | 9379.708193 | 232.5855037 |
| ADOCBLS    | 26.385<br>6  | 10035.97058 | 380.3578686 | 10035.97058 | 380.3578686 |
| ADOCBIK    | 40.328       | 9323.058784 | 231.1807871 | 9323.058784 | 231.1807871 |
| TMPK       | 35.070<br>8  | 828         | 23.60938445 | 828         | 23.60938445 |
| HPPPND0    | 136.78       | 35492.10059 | 259.4751484 | 35492.10059 | 259.4751484 |

|            |              |             |             |             |             |
|------------|--------------|-------------|-------------|-------------|-------------|
|            | 42           |             |             |             |             |
| DHCINDO    | 136.78<br>42 | 19495.60768 | 142.5282137 | 19495.60768 | 142.5282137 |
| HKND DH    | 63.874<br>9  | 38363.58101 | 600.6049482 | 38363.58101 | 600.6049482 |
| HKNTDH     | 63.874<br>9  | 18327.29297 | 286.924801  | 18327.29297 | 286.924801  |
| GLYCK2     | 39.104<br>3  | 61745.26025 | 1578.989018 | 61745.26025 | 1578.989018 |
| ENTCS      | 23.258<br>6  | 10772.53122 | 463.1633554 | 10772.53122 | 463.1633554 |
| SULR       | 786.15<br>12 | 71599.20646 | 91.07561809 | 71599.20646 | 91.07561809 |
| MANPGH     | 100.01<br>5  | 80637.61097 | 806.2551714 | 80637.61097 | 806.2551714 |
| URDGLYCD   | 75.934<br>2  | 10345.53972 | 136.2434808 | 10345.53972 | 136.2434808 |
| CBMKr      | 31.644<br>1  | 37048.79484 | 1170.796289 | 37048.79484 | 1170.796289 |
| AMANAPEr   | 24.073<br>7  | 25940.03066 | 1077.525709 | 25940.03066 | 1077.525709 |
| ACM6PH     | 62.439<br>8  | 12910.85677 | 206.772872  | 12910.85677 | 206.772872  |
| NNATr      | 24.528       | 15120       | 616.4383562 | 15120       | 616.4383562 |
| CYTDH_num1 | 33.822<br>9  | 23757.87457 | 702.4197975 | 23757.87457 | 702.4197975 |
| CYTDH_num2 | 134.99<br>2  | 23757.87457 | 175.9946854 | 23757.87457 | 175.9946854 |
| CYTDH_num3 | 32.560<br>8  | 23757.87457 | 729.6465249 | 23757.87457 | 729.6465249 |
| PSERT      | 79.566<br>6  | 29880       | 375.5344579 | 29880       | 375.5344579 |
| AIRC2      | 78.922<br>2  | 554400      | 7024.639455 | 554400      | 7024.639455 |
| GAPD       | 142.13       | 104400      | 734.5388025 | 3596400     | 25303.5953  |
| HEX1       | 34.723<br>1  | 47562.8567  | 1369.775645 | 47562.8567  | 1369.775645 |
| GND        | 102.96<br>26 | 79200       | 769.2113447 | 1170000     | 11363.34941 |
| TAUDO      | 129.63<br>81 | 9422.360968 | 72.68203536 | 9422.360968 | 72.68203536 |
| ME2        | 494.50<br>43 | 502505.1652 | 1016.179566 | 502505.1652 | 1016.179566 |

|            |              |             |             |             |             |
|------------|--------------|-------------|-------------|-------------|-------------|
| ARGSL      | 50.318<br>2  | 39600       | 786.9915855 | 39600       | 786.9915855 |
| CBPS       | 318.54<br>55 | 12764.65483 | 40.07168466 | 12764.65483 | 40.07168466 |
| GLU5K      | 156.22<br>61 | 90000       | 576.0881184 | 90000       | 576.0881184 |
| IPPS       | 57.297<br>9  | 36000       | 628.2952778 | 36000       | 628.2952778 |
| ACOATA     | 75.669<br>8  | 32149.38905 | 424.8642001 | 32149.38905 | 424.8642001 |
| MLTG2      | 69.041       | 44577.3078  | 645.6642835 | 44577.3078  | 645.6642835 |
| MLTG1      | 69.041       | 64611.20243 | 935.8381603 | 64611.20243 | 935.8381603 |
| AMALT3     | 78.503<br>5  | 26398.09512 | 336.2664737 | 26398.09512 | 336.2664737 |
| MLTP3      | 181.04<br>48 | 21419.81586 | 118.3122402 | 21419.81586 | 118.3122402 |
| SPODM_num1 | 46.194<br>2  | 43146.08622 | 934.0152275 | 43146.08622 | 934.0152275 |
| SPODM_num2 | 42.531<br>6  | 43146.08622 | 1014.447757 | 43146.08622 | 1014.447757 |
| AHCYSNS    | 48.707<br>9  | 108         | 2.217299452 | 108         | 2.217299452 |
| TMK        | 32.397<br>3  | 9301.67635  | 287.1127023 | 9301.67635  | 287.1127023 |
| NTPP4_num1 | 15.046<br>1  | 9555.079144 | 635.053545  | 9555.079144 | 635.053545  |
| NTPP4_num2 | 60.824<br>6  | 9555.079144 | 157.0923466 | 9555.079144 | 157.0923466 |
| NTPP3_num1 | 60.824<br>6  | 50618.48846 | 832.2042145 | 50618.48846 | 832.2042145 |
| NTPP3_num2 | 16.370<br>7  | 50618.48846 | 3092.017352 | 50618.48846 | 3092.017352 |
| NTPP3_num3 | 15.046<br>1  | 50618.48846 | 3364.226508 | 50618.48846 | 3364.226508 |
| NTPP6_num1 | 60.824<br>6  | 10261.67914 | 168.7093568 | 10261.67914 | 168.7093568 |
| NTPP6_num2 | 65.651<br>6  | 10261.67914 | 156.3050884 | 10261.67914 | 156.3050884 |
| NTPP7_num1 | 16.370<br>7  | 9517.851461 | 581.3955091 | 9517.851461 | 581.3955091 |
| NTPP7_num2 | 60.824<br>6  | 9517.851461 | 156.4802968 | 9517.851461 | 156.4802968 |
| NTPP7_num3 | 43.030       | 9517.851461 | 221.1864372 | 9517.851461 | 221.1864372 |

|             |              |             |             |             |             |
|-------------|--------------|-------------|-------------|-------------|-------------|
|             | 9            |             |             |             |             |
| NTPP8_num1  | 60.824<br>6  | 9521.20381  | 156.5354118 | 9521.20381  | 156.5354118 |
| NTPP8_num2  | 43.030<br>9  | 9521.20381  | 221.2643428 | 9521.20381  | 221.2643428 |
| P5CR        | 281.44<br>88 | 115200      | 409.310681  | 115200      | 409.310681  |
| CYANST_num1 | 37.277<br>5  | 331771.8227 | 8900.055601 | 331771.8227 | 8900.055601 |
| CYANST_num2 | 24.164<br>9  | 331771.8227 | 13729.49289 | 331771.8227 | 13729.49289 |
| CYANST_num3 | 30.811<br>8  | 331771.8227 | 10767.68714 | 331771.8227 | 10767.68714 |
| DHPPDA2     | 80.676<br>6  | 1152        | 14.27923338 | 1152        | 14.27923338 |
| GMAND       | 84.093<br>7  | 18347.65327 | 218.181068  | 18347.65327 | 218.181068  |
| PPCSCT      | 53.824<br>4  | 15747.6871  | 292.5752466 | 15747.6871  | 292.5752466 |
| CYTD        | 63.079<br>7  | 65944.35572 | 1045.413274 | 65944.35572 | 1045.413274 |
| DCYTD       | 63.079<br>7  | 58808.63711 | 932.2910082 | 58808.63711 | 932.2910082 |
| DBTS        | 48.279<br>2  | 1.8         | 0.037283136 | 1.8         | 0.037283136 |
| DCTPD       | 63.747<br>8  | 10867.18117 | 170.47147   | 10867.18117 | 170.47147   |
| DHDPS       | 125.07<br>99 | 39600       | 316.5976308 | 39600       | 316.5976308 |
| G1PACT      | 147.57<br>02 | 57600       | 390.3227074 | 57600       | 390.3227074 |
| GART        | 42.433<br>7  | 432         | 10.1805876  | 432         | 10.1805876  |
| CSND        | 285.54<br>59 | 15341.80556 | 53.72798405 | 15341.80556 | 53.72798405 |
| GF6PTA      | 133.78<br>87 | 7920        | 59.19782463 | 7920        | 59.19782463 |
| GLUCYS      | 58.269<br>3  | 24739.04104 | 424.5638962 | 24739.04104 | 424.5638962 |
| GLUN_num1   | 131.61<br>33 | 43731.73602 | 332.2744435 | 43731.73602 | 332.2744435 |
| GLUN_num2   | 67.031<br>2  | 43731.73602 | 652.4086697 | 43731.73602 | 652.4086697 |

|             |              |             |             |             |             |
|-------------|--------------|-------------|-------------|-------------|-------------|
| GLUPRT      | 225.95<br>22 | 219600      | 971.8869743 | 219600      | 971.8869743 |
| GMPR        | 149.53<br>47 | 11043.44409 | 73.85204965 | 11043.44409 | 73.85204965 |
| NADS1       | 61.273<br>7  | 180         | 2.937638824 | 180         | 2.937638824 |
| NTRIR2x     | 105.40<br>53 | 194253.4062 | 1842.918773 | 194253.4062 | 1842.918773 |
| OCBT_num1   | 110.72<br>13 | 45832.3358  | 413.9432594 | 45832.3358  | 413.9432594 |
| OCBT_num2   | 110.48<br>14 | 45832.3358  | 414.8420983 | 45832.3358  | 414.8420983 |
| GARFT       | 23.238<br>3  | 403200      | 17350.66679 | 403200      | 17350.66679 |
| GPDDA1      | 27.409<br>6  | 10438.37512 | 380.8291664 | 10438.37512 | 380.8291664 |
| GPDDA2      | 27.409<br>6  | 9300.301081 | 339.3081651 | 9300.301081 | 339.3081651 |
| PHETA1_num1 | 87.146<br>7  | 163144.9555 | 1872.072672 | 163144.9555 | 1872.072672 |
| PHETA1_num2 | 87.075<br>6  | 163144.9555 | 1873.601279 | 163144.9555 | 1873.601279 |
| PHETA1_num3 | 204.56<br>19 | 163144.9555 | 797.5334386 | 163144.9555 | 797.5334386 |
| PPND        | 84.085       | 79200       | 941.9040257 | 79200       | 941.9040257 |
| TRPS1       | 143.41<br>43 | 10429.37243 | 72.72198397 | 10429.37243 | 72.72198397 |
| PRAMPC      | 22.755<br>8  | 79200       | 3480.431363 | 79200       | 3480.431363 |
| MCITL2      | 128.53<br>86 | 38608.8206  | 300.3675208 | 38608.8206  | 300.3675208 |
| DXYLK       | 105.23<br>65 | 37749.01216 | 358.7064579 | 37749.01216 | 358.7064579 |
| MDH3        | 60.229<br>6  | 139494.2586 | 2316.04159  | 139494.2586 | 2316.04159  |
| SOTA        | 87.330<br>7  | 24429.86623 | 279.7397276 | 24429.86623 | 279.7397276 |
| SGSAD       | 53.026<br>3  | 28118.21406 | 530.2692072 | 28118.21406 | 530.2692072 |
| PTA2        | 463.03<br>25 | 89932.12319 | 194.2242136 | 89932.12319 | 194.2242136 |
| MDH2        | 60.229<br>6  | 42664.64483 | 708.3667304 | 42664.64483 | 708.3667304 |

|            |              |             |             |             |             |
|------------|--------------|-------------|-------------|-------------|-------------|
| ACOTA_num1 | 91.549<br>3  | 17996.38411 | 196.5758789 | 17996.38411 | 196.5758789 |
| ACOTA_num2 | 87.330<br>7  | 17996.38411 | 206.0716805 | 17996.38411 | 206.0716805 |
| ACOTA_num3 | 87.533<br>9  | 17996.38411 | 205.5933085 | 17996.38411 | 205.5933085 |
| ACOTA_num4 | 44.729<br>1  | 17996.38411 | 402.3417442 | 17996.38411 | 402.3417442 |
| GPDDA5     | 27.409<br>6  | 10984.70162 | 400.7611064 | 10984.70162 | 400.7611064 |
| PDX5PS     | 281.30<br>19 | 9443.526638 | 33.57078867 | 9443.526638 | 33.57078867 |
| PPBNGS     | 284.99<br>83 | 864         | 3.031597031 | 864         | 3.031597031 |
| PPNCL2     | 521.25<br>77 | 540         | 1.03595592  | 540         | 1.03595592  |
| PRAGSr     | 45.940<br>4  | 72000       | 1567.248    | 72000       | 1567.248    |
| PRFGS      | 141.40<br>27 | 50400       | 356.4288376 | 50400       | 356.4288376 |
| ETHAAL     | 487.10<br>78 | 71428.12398 | 146.6372002 | 71428.12398 | 146.6372002 |
| MAN1PT2    | 53.016<br>3  | 174021.8972 | 3282.422524 | 174021.8972 | 3282.422524 |
| AP4AH      | 31.296<br>7  | 77148.74714 | 2465.076099 | 77148.74714 | 2465.076099 |
| AP5AH      | 31.296<br>7  | 42259.28724 | 1350.279334 | 42259.28724 | 1350.279334 |
| ADNCYC     | 97.586       | 31838.44056 | 326.2603299 | 31838.44056 | 326.2603299 |
| MI1PP      | 29.172<br>1  | 404041.0784 | 13850.25687 | 404041.0784 | 13850.25687 |
| MCITS      | 86.204<br>4  | 35244.93913 | 408.8531343 | 35244.93913 | 408.8531343 |
| PPAKr      | 43.384<br>1  | 12000.38922 | 276.6080021 | 12000.38922 | 276.6080021 |
| NTP3_num1  | 68.867<br>4  | 24885.86102 | 361.3590904 | 24885.86102 | 361.3590904 |
| NTP3_num2  | 36.703<br>9  | 24885.86102 | 678.0168054 | 24885.86102 | 678.0168054 |
| NTP3_num3  | 35.659<br>7  | 24885.86102 | 697.8707343 | 24885.86102 | 697.8707343 |
| NTP3_num4  | 39.193<br>3  | 24885.86102 | 634.9519184 | 24885.86102 | 634.9519184 |

|            |              |             |             |             |             |
|------------|--------------|-------------|-------------|-------------|-------------|
| NTP3_num5  | 31.565       | 24885.86102 | 788.4004759 | 24885.86102 | 788.4004759 |
| NTP3_num6  | 36.113<br>2  | 24885.86102 | 689.1070584 | 24885.86102 | 689.1070584 |
| NTP3_num7  | 48.327<br>1  | 24885.86102 | 514.9462935 | 24885.86102 | 514.9462935 |
| PPM2       | 44.37        | 146884.0402 | 3310.435884 | 146884.0402 | 3310.435884 |
| MOAT2      | 47.291<br>1  | 212400      | 4491.33135  | 212400      | 4491.33135  |
| G6PDH2r    | 55.704<br>4  | 558000      | 10017.16202 | 558000      | 10017.16202 |
| NADH5_num1 | 40.751<br>1  | 19111.97638 | 468.9928953 | 19111.97638 | 468.9928953 |
| NADH5_num2 | 47.358<br>7  | 19111.97638 | 403.5578759 | 19111.97638 | 403.5578759 |
| NADH5_num3 | 40.34        | 19111.97638 | 473.7723445 | 19111.97638 | 473.7723445 |
| NADH5_num4 | 83.382<br>2  | 19111.97638 | 229.2093082 | 19111.97638 | 229.2093082 |
| MOHMT      | 282.37<br>44 | 36          | 0.127490311 | 36          | 0.127490311 |
| GMPS       | 117.35<br>84 | 24356.93407 | 207.5431675 | 24356.93407 | 207.5431675 |
| UDPGD      | 87.313<br>8  | 49328.26859 | 564.9538628 | 49328.26859 | 564.9538628 |
| GLCRD_num1 | 48.849<br>6  | 16806.78677 | 344.0516763 | 16806.78677 | 344.0516763 |
| GLCRD_num2 | 49.141       | 16806.78677 | 342.0114928 | 16806.78677 | 342.0114928 |
| PPPND0     | 126.99<br>54 | 20380.61275 | 160.4830785 | 20380.61275 | 160.4830785 |
| CHRPL_num1 | 18.776<br>9  | 828         | 44.09673588 | 828         | 44.09673588 |
| CHRPL_num2 | 59.430<br>1  | 828         | 13.93233395 | 828         | 13.93233395 |
| TDPAGTA    | 167.60<br>41 | 14344.14992 | 85.58352642 | 14344.14992 | 85.58352642 |
| UACMAMO    | 91.677<br>5  | 34516.73316 | 376.5016843 | 34516.73316 | 376.5016843 |
| FBA3       | 78.294<br>5  | 14400       | 183.9209651 | 14400       | 183.9209651 |
| PMPK       | 114.53<br>44 | 1800        | 15.71580241 | 1800        | 15.71580241 |
| LCADi      | 209.09<br>12 | 22726.49816 | 108.6917965 | 22726.49816 | 108.6917965 |
| ADK3       | 23.586       | 10020.99778 | 424.8705918 | 10020.99778 | 424.8705918 |

|                    |              |             |             |             |             |
|--------------------|--------------|-------------|-------------|-------------|-------------|
| GLUDC_num1         | 316.11<br>1  | 63196.41049 | 199.9184163 | 63196.41049 | 199.9184163 |
| GLUDC_num2         | 316.00<br>88 | 63196.41049 | 199.9830716 | 63196.41049 | 199.9830716 |
| BSORy              | 85.850<br>7  | 52282.98518 | 608.9989387 | 52282.98518 | 608.9989387 |
| ADSK               | 44.642<br>6  | 79200       | 1774.090219 | 79200       | 1774.090219 |
| HSDy_num1          | 177.77<br>54 | 70415.01259 | 396.0897435 | 70415.01259 | 396.0897435 |
| HSDy_num2          | 356.48<br>1  | 70415.01259 | 197.5280943 | 70415.01259 | 197.5280943 |
| CYSTL_num1         | 172.84<br>95 | 16792.14941 | 97.14896145 | 16792.14941 | 97.14896145 |
| CYSTL_num2         | 87.283<br>7  | 16792.14941 | 192.3858568 | 16792.14941 | 192.3858568 |
| SHSL1              | 166.20<br>16 | 36000       | 216.604413  | 36000       | 216.604413  |
| SSALy_num1         | 99.435<br>7  | 30829.92795 | 310.0488854 | 30829.92795 | 310.0488854 |
| SSALy_num2         | 206.88<br>03 | 30829.92795 | 149.0230242 | 30829.92795 | 149.0230242 |
| 3HCINNMH           | 62.185<br>7  | 13931.45469 | 224.0298764 | 13931.45469 | 224.0298764 |
| BSORx              | 85.850<br>7  | 11186.78545 | 130.3051164 | 11186.78545 | 130.3051164 |
| FACOAL160t2pp_num1 | 60.773<br>1  | 20734.33515 | 341.1761973 | 20734.33515 | 341.1761973 |
| FACOAL160t2pp_num2 | 124.66<br>4  | 20734.33515 | 166.3217541 | 20734.33515 | 166.3217541 |
| FACOAL180t2pp_num1 | 60.773<br>1  | 19696.91639 | 324.1058361 | 19696.91639 | 324.1058361 |
| FACOAL180t2pp_num2 | 124.66<br>4  | 19696.91639 | 158.0000352 | 19696.91639 | 158.0000352 |
| SPODMpp            | 17.681       | 10789.89295 | 610.2535462 | 10789.89295 | 610.2535462 |
| NO3R1bpp           | 189.23<br>73 | 174653.5775 | 922.9342077 | 174653.5775 | 922.9342077 |
| PHYTSpp            | 94.113<br>7  | 38198.7126  | 405.8783429 | 38198.7126  | 405.8783429 |
| PPTHpp             | 98.877<br>2  | 6160798.267 | 62307.57209 | 6160798.267 | 62307.57209 |
| NO3R2pp_num1       | 250.96<br>3  | 1547926.092 | 6167.945442 | 1547926.092 | 6167.945442 |

|                   |              |             |             |             |             |
|-------------------|--------------|-------------|-------------|-------------|-------------|
| NO3R2pp_num2      | 474.55<br>52 | 1547926.092 | 3261.846234 | 1547926.092 | 3261.846234 |
| NTP3pp            | 94.113<br>7  | 9514.245618 | 101.0930993 | 9514.245618 | 101.0930993 |
| NO3R2bpp          | 132.43<br>91 | 22948.30134 | 173.2743679 | 22948.30134 | 173.2743679 |
| THD2pp            | 206.69<br>29 | 2171332.143 | 10505.11238 | 2171332.143 | 10505.11238 |
| TMAOR1pp_num<br>1 | 138.06<br>25 | 26365.14013 | 190.9652522 | 26365.14013 | 190.9652522 |
| TMAOR1pp_num<br>2 | 129.25<br>04 | 26365.14013 | 203.984979  | 26365.14013 | 203.984979  |
| TMAOR2pp_num<br>1 | 138.06<br>25 | 18727.86361 | 135.6477219 | 18727.86361 | 135.6477219 |
| TMAOR2pp_num<br>2 | 129.25<br>04 | 18727.86361 | 144.8959818 | 18727.86361 | 144.8959818 |
| ACACT7r_num1      | 46.530<br>5  | 36389.7463  | 782.0622236 | 36389.7463  | 782.0622236 |
| ACACT7r_num2      | 81.752<br>4  | 36389.7463  | 445.1214435 | 36389.7463  | 445.1214435 |
| PSP_L             | 35.042<br>7  | 5331600     | 152145.8107 | 5331600     | 152145.8107 |
| ACACT2r_num1      | 46.530<br>5  | 45028.02067 | 967.7097962 | 45028.02067 | 967.7097962 |
| ACACT2r_num2      | 81.752<br>4  | 45028.02067 | 550.7853063 | 45028.02067 | 550.7853063 |
| ACACT3r_num1      | 46.530<br>5  | 35394.18648 | 760.666369  | 35394.18648 | 760.666369  |
| ACACT3r_num2      | 81.752<br>4  | 35394.18648 | 432.9436993 | 35394.18648 | 432.9436993 |
| ACACT4r_num1      | 46.530<br>5  | 41966.54604 | 901.9147879 | 41966.54604 | 901.9147879 |
| ACACT4r_num2      | 81.752<br>4  | 41966.54604 | 513.3371747 | 41966.54604 | 513.3371747 |
| AHGDx             | 176.70<br>31 | 23135.45055 | 130.9283796 | 23135.45055 | 130.9283796 |
| GTPCI             | 248.30<br>62 | 28.8        | 0.115985827 | 28.8        | 0.115985827 |
| FDMO              | 166.94<br>51 | 9726.121987 | 58.25940376 | 9726.121987 | 58.25940376 |
| CHOLD             | 61.877<br>6  | 32331.58284 | 522.5086759 | 32331.58284 | 522.5086759 |
| DRPA              | 27.733<br>8  | 57740.0409  | 2081.937596 | 57740.0409  | 2081.937596 |

|               |              |             |             |             |             |
|---------------|--------------|-------------|-------------|-------------|-------------|
| TKT2_num1     | 144.42<br>35 | 324065.5255 | 2243.85592  | 324065.5255 | 2243.85592  |
| TKT2_num2     | 73.042<br>7  | 324065.5255 | 4436.658632 | 324065.5255 | 4436.658632 |
| DMSOR1pp      | 129.25<br>04 | 32437.32175 | 250.9649622 | 32437.32175 | 250.9649622 |
| NTD8pp_num1   | 104.41<br>42 | 15863.73439 | 151.9308139 | 15863.73439 | 151.9308139 |
| NTD8pp_num2   | 60.824       | 15863.73439 | 260.8137313 | 15863.73439 | 260.8137313 |
| TREHpp        | 63.636<br>7  | 42399.81511 | 666.2792871 | 42399.81511 | 666.2792871 |
| CYTBDpp_num1  | 100.34<br>37 | 49127.83924 | 489.5956521 | 49127.83924 | 489.5956521 |
| CYTBDpp_num2  | 104.69<br>99 | 49127.83924 | 469.2252737 | 49127.83924 | 469.2252737 |
| CYTBD2pp      | 100.34<br>37 | 28476.71077 | 283.7917156 | 28476.71077 | 283.7917156 |
| ATPS4rpp_num1 | 543.64<br>44 | 6754830.271 | 12425.0894  | 6754830.271 | 12425.0894  |
| ATPS4rpp_num2 | 530.01<br>27 | 6754830.271 | 12744.65739 | 6754830.271 | 12744.65739 |
| ECOA8H8_num1  | 77.072<br>2  | 18863.03522 | 244.7449952 | 18863.03522 | 244.7449952 |
| ECOA8H8_num2  | 159.18<br>78 | 18863.03522 | 118.4954828 | 18863.03522 | 118.4954828 |
| GLCDpp_num1   | 86.747<br>4  | 43571.8008  | 502.2836512 | 43571.8008  | 502.2836512 |
| GLCDpp_num2   | 41.054<br>5  | 43571.8008  | 1061.316075 | 43571.8008  | 1061.316075 |
| HYD2pp_num1   | 482.93<br>35 | 7210616.458 | 14930.86824 | 7210616.458 | 14930.86824 |
| HYD2pp_num2   | 181.74<br>82 | 7210616.458 | 39673.66091 | 7210616.458 | 39673.66091 |
| ECOA8H5_num1  | 77.072<br>2  | 45024.42384 | 584.1850089 | 45024.42384 | 584.1850089 |
| ECOA8H5_num2  | 159.18<br>78 | 45024.42384 | 282.8384075 | 45024.42384 | 282.8384075 |
| DHFS          | 45.405<br>7  | 828         | 18.23559597 | 828         | 18.23559597 |
| ACGAMK        | 33.042<br>7  | 21792.22839 | 659.5171821 | 21792.22839 | 659.5171821 |
| METS_num1     | 135.99<br>7  | 1116        | 8.206063369 | 1116        | 8.206063369 |

|              |              |             |             |             |             |
|--------------|--------------|-------------|-------------|-------------|-------------|
| METS_num2    | 84.673<br>5  | 1116        | 13.18003862 | 3596400     | 42473.73736 |
| PRASCSi      | 80.985       | 12600       | 155.5843675 | 12600       | 155.5843675 |
| TRSARr_num1  | 123.20<br>23 | 53910.27997 | 437.5752723 | 53910.27997 | 437.5752723 |
| TRSARr_num2  | 30.427<br>4  | 53910.27997 | 1771.767551 | 53910.27997 | 1771.767551 |
| LYXI         | 188.79<br>78 | 47448.98608 | 251.3217107 | 47448.98608 | 251.3217107 |
| URIH_num1    | 33.822<br>9  | 12358.14336 | 365.3779942 | 12358.14336 | 365.3779942 |
| URIH_num2    | 134.99<br>2  | 12358.14336 | 91.54722769 | 12358.14336 | 91.54722769 |
| URIH_num3    | 32.560<br>8  | 12358.14336 | 379.5405322 | 12358.14336 | 379.5405322 |
| XTSNH        | 32.560<br>8  | 482024.5754 | 14803.83085 | 482024.5754 | 14803.83085 |
| INSH         | 32.560<br>8  | 36111.155   | 1109.037708 | 36111.155   | 1109.037708 |
| PPK2         | 160.86<br>3  | 39038.03057 | 242.6787426 | 39038.03057 | 242.6787426 |
| MTHFR2       | 132.41<br>09 | 9720        | 73.40785389 | 9720        | 73.40785389 |
| ASPO3        | 60.337<br>4  | 10440.93368 | 173.0424857 | 10440.93368 | 173.0424857 |
| ASPO5        | 60.337<br>4  | 9646.312734 | 159.8728605 | 9646.312734 | 159.8728605 |
| ASPO4        | 60.337<br>4  | 9316.275055 | 154.4029914 | 9316.275055 | 154.4029914 |
| ASPO6        | 60.337<br>4  | 15120       | 250.5908442 | 15120       | 250.5908442 |
| ACACT5r_num1 | 81.752<br>4  | 48979.49998 | 599.1200255 | 48979.49998 | 599.1200255 |
| ACACT5r_num2 | 46.530<br>5  | 48979.49998 | 1052.632144 | 48979.49998 | 1052.632144 |
| MALDDH       | 40.314<br>9  | 21531.68437 | 534.0875054 | 21531.68437 | 534.0875054 |
| DHPS2        | 61.230<br>2  | 720         | 11.75890329 | 720         | 11.75890329 |
| MTHFC        | 62.087<br>5  | 248400      | 4000.805315 | 248400      | 4000.805315 |
| MTHFD        | 62.087<br>5  | 248400      | 4000.805315 | 248400      | 4000.805315 |

|              |              |             |             |             |             |
|--------------|--------------|-------------|-------------|-------------|-------------|
| QULNS        | 76.481<br>6  | 1656        | 21.65226669 | 1656        | 21.65226669 |
| ALKP         | 20.779<br>8  | 10071.37347 | 484.6713383 | 10071.37347 | 484.6713383 |
| L_LACD3_num1 | 104.26<br>89 | 61053.04188 | 585.534535  | 61053.04188 | 585.534535  |
| L_LACD3_num2 | 42.728<br>2  | 61053.04188 | 1428.869971 | 61053.04188 | 1428.869971 |
| L_LACD2_num1 | 104.26<br>89 | 93550.12704 | 897.200671  | 93550.12704 | 897.200671  |
| L_LACD2_num2 | 42.728<br>2  | 93550.12704 | 2189.423543 | 93550.12704 | 2189.423543 |
| ACACT6r_num1 | 46.530<br>5  | 40632.79266 | 873.2507207 | 40632.79266 | 873.2507207 |
| ACACT6r_num2 | 81.752<br>4  | 40632.79266 | 497.0226276 | 40632.79266 | 497.0226276 |
| GLCTR1       | 42.284<br>1  | 19615.95287 | 463.9084872 | 19615.95287 | 463.9084872 |
| LIPAbcpp     | 128.92<br>14 | 14115.54858 | 109.4895695 | 14115.54858 | 109.4895695 |
| LIPACabcpp   | 128.92<br>14 | 10250.91946 | 79.51293939 | 10250.91946 | 79.51293939 |
| GGGABADr     | 53.418<br>6  | 20624.58608 | 386.0937217 | 20624.58608 | 386.0937217 |
| GLYOX3       | 62.380<br>9  | 9301.150228 | 149.1025334 | 9301.150228 | 149.1025334 |
| FDMO3        | 166.94<br>51 | 19785.56126 | 118.5153758 | 19785.56126 | 118.5153758 |
| FDMO4        | 166.94<br>51 | 14910.81158 | 89.31565875 | 14910.81158 | 89.31565875 |
| O16GLCT1     | 43.188<br>2  | 28037.51536 | 649.1938854 | 28037.51536 | 649.1938854 |
| O16AP2pp     | 81.199       | 12811.16978 | 157.7749699 | 12811.16978 | 157.7749699 |
| O16AP3pp     | 81.199       | 16964.83849 | 208.9291554 | 16964.83849 | 208.9291554 |
| O16A4Lpp     | 46.877<br>7  | 21752.96452 | 464.0365146 | 21752.96452 | 464.0365146 |
| MALTATr      | 60.288       | 33857.47486 | 561.5955889 | 33857.47486 | 561.5955889 |
| ENTERES      | 45.651<br>9  | 11061.15945 | 242.293518  | 11061.15945 | 242.293518  |
| LADGMDH      | 53.116       | 25938.68088 | 488.340253  | 25938.68088 | 488.340253  |
| ALAGLUE      | 34.674       | 73466.26981 | 2118.77112  | 73466.26981 | 2118.77112  |
| GGGABAH      | 56.026<br>1  | 5814339.581 | 103779.124  | 5814339.581 | 103779.124  |

|                   |              |             |             |             |             |
|-------------------|--------------|-------------|-------------|-------------|-------------|
| FRULYSK           | 28.331<br>8  | 26674.19432 | 941.493104  | 26674.19432 | 941.493104  |
| FDMO6             | 166.94<br>51 | 9703.843927 | 58.12595834 | 9703.843927 | 58.12595834 |
| CYANSTpp          | 11.475<br>3  | 10162.25352 | 885.5762833 | 10162.25352 | 885.5762833 |
| MCPST             | 30.811<br>8  | 11568.74394 | 375.4647225 | 11568.74394 | 375.4647225 |
| ECAP1pp           | 135.96<br>6  | 53500.34426 | 393.4832551 | 53500.34426 | 393.4832551 |
| UDCPDPpp_num<br>1 | 29.758<br>8  | 22302.93351 | 749.4567492 | 22302.93351 | 749.4567492 |
| UDCPDPpp_num<br>2 | 29.021<br>3  | 22302.93351 | 768.5022211 | 22302.93351 | 768.5022211 |
| UDCPDPpp_num<br>3 | 22.398<br>6  | 22302.93351 | 995.7289076 | 22302.93351 | 995.7289076 |
| ECAP2pp           | 135.96<br>6  | 113152.0132 | 832.2081489 | 113152.0132 | 832.2081489 |
| ECA4OALpp         | 46.877<br>7  | 9951.766805 | 212.2921305 | 9951.766805 | 212.2921305 |
| FE3Ri             | 26.242       | 41567.57582 | 1584.009444 | 41567.57582 | 1584.009444 |
| NODOy             | 43.867<br>7  | 18721.97778 | 426.782753  | 18721.97778 | 426.782753  |
| GALM2pp           | 38.190<br>5  | 52658.36885 | 1378.834235 | 52658.36885 | 1378.834235 |
| GLCTR3            | 39.040<br>3  | 14212.74192 | 364.0530919 | 14212.74192 | 364.0530919 |
| HEPT4             | 41.729<br>5  | 66050.8024  | 1582.832346 | 66050.8024  | 1582.832346 |
| LA4NTpp           | 62.542<br>6  | 30335.10919 | 485.0311498 | 30335.10919 | 485.0311498 |
| NODOx             | 43.867<br>7  | 34540.48398 | 787.3785034 | 34540.48398 | 787.3785034 |
| NHFRBO            | 258.34<br>03 | 76271.50746 | 295.2365831 | 76271.50746 | 295.2365831 |
| 42A12BOOXpp       | 168.75<br>73 | 12329.96585 | 73.06330363 | 12329.96585 | 73.06330363 |
| TYROXDApp         | 168.75<br>73 | 12377.02951 | 73.34218731 | 12377.02951 | 73.34218731 |
| NTRIR4pp          | 134.02<br>71 | 752249.2273 | 5612.665105 | 752249.2273 | 5612.665105 |
| NTRIR3pp          | 134.02<br>71 | 1003797.469 | 7489.511216 | 1003797.469 | 7489.511216 |

|                    |              |             |             |             |             |
|--------------------|--------------|-------------|-------------|-------------|-------------|
| AGM3PA             | 20.536<br>2  | 24213.93207 | 1179.085326 | 24213.93207 | 1179.085326 |
| ACANTHAT           | 64.549<br>2  | 14042.58626 | 217.5485717 | 14042.58626 | 217.5485717 |
| METSOXR1_num<br>1  | 101.40<br>54 | 9516.09821  | 93.84212488 | 9516.09821  | 93.84212488 |
| METSOXR1_num<br>2  | 38.869<br>8  | 9516.09821  | 244.8198398 | 9516.09821  | 244.8198398 |
| METSOXR1_num<br>3  | 35.121<br>6  | 9516.09821  | 270.9471724 | 9516.09821  | 270.9471724 |
| METSOXR1_num<br>4  | 97.657<br>3  | 9516.09821  | 97.44379796 | 9516.09821  | 97.44379796 |
| METSOXR2_num<br>1  | 48.049<br>9  | 9462.184355 | 196.9241217 | 9462.184355 | 196.9241217 |
| METSOXR2_num<br>2  | 31.006       | 9462.184355 | 305.1726877 | 9462.184355 | 305.1726877 |
| METSOXR2_num<br>3  | 27.257<br>8  | 9462.184355 | 347.1367592 | 9462.184355 | 347.1367592 |
| METSOXR2_num<br>4  | 51.798       | 9462.184355 | 182.6747047 | 9462.184355 | 182.6747047 |
| DAPAL              | 86.655<br>1  | 33933.61467 | 391.5939705 | 33933.61467 | 391.5939705 |
| AMPTASECG_nu<br>m1 | 277.08<br>1  | 81038.05956 | 292.4706478 | 81038.05956 | 292.4706478 |
| AMPTASECG_nu<br>m2 | 98.918<br>9  | 81038.05956 | 819.2373708 | 81038.05956 | 819.2373708 |
| AMPTASECG_nu<br>m3 | 329.27<br>89 | 81038.05956 | 246.10766   | 81038.05956 | 246.10766   |
| AMPTASECG_nu<br>m4 | 105.83<br>08 | 81038.05956 | 765.7322779 | 81038.05956 | 765.7322779 |
| LACZpp             | 83.46        | 21454.23258 | 257.0600597 | 21454.23258 | 257.0600597 |
| GPDDA1pp           | 81.686<br>7  | 37449.60109 | 458.4540824 | 37449.60109 | 458.4540824 |
| GPDDA5pp           | 81.686<br>7  | 28550.56261 | 349.5129882 | 28550.56261 | 349.5129882 |
| FLVR_num1          | 26.242       | 11168.07223 | 425.5800711 | 11168.07223 | 425.5800711 |
| FLVR_num2          | 786.15<br>12 | 11168.07223 | 14.20601053 | 11168.07223 | 14.20601053 |
| FDMO2              | 166.94<br>51 | 9825.639001 | 58.85550999 | 9825.639001 | 58.85550999 |
| LALGP              | 105.83<br>08 | 231021.2838 | 2182.930525 | 231021.2838 | 2182.930525 |
| AGM4PApp_num       | 31.412       | 24410.50695 | 777.1052223 | 24410.50695 | 777.1052223 |

|                   |              |             |             |             |             |
|-------------------|--------------|-------------|-------------|-------------|-------------|
| 1                 | 1            |             |             |             |             |
| AGM4PApp_num<br>2 | 45.634<br>4  | 24410.50695 | 534.9146029 | 24410.50695 | 534.9146029 |
| AGM4PApp_num<br>3 | 47.985<br>2  | 24410.50695 | 508.7090802 | 24410.50695 | 508.7090802 |
| AGM4PApp_num<br>4 | 31.072<br>4  | 24410.50695 | 785.6009498 | 24410.50695 | 785.6009498 |
| AGM4PA            | 20.536<br>2  | 20099.44301 | 978.7323368 | 20099.44301 | 978.7323368 |
| RNDR3b_num1       | 258.19<br>47 | 19613.29221 | 75.96318675 | 19613.29221 | 75.96318675 |
| RNDR3b_num2       | 243.52<br>94 | 19613.29221 | 80.53767723 | 19613.29221 | 80.53767723 |
| RNDR3b_num3       | 242.98<br>2  | 19613.29221 | 80.71911588 | 19613.29221 | 80.71911588 |
| RNDR3b_num4       | 259.60<br>2  | 19613.29221 | 75.55139103 | 19613.29221 | 75.55139103 |
| RNDR4b_num1       | 259.60<br>2  | 173713.9787 | 669.155009  | 173713.9787 | 669.155009  |
| RNDR4b_num2       | 243.52<br>94 | 173713.9787 | 713.3183043 | 173713.9787 | 713.3183043 |
| RNDR4b_num3       | 242.98<br>2  | 173713.9787 | 714.9252976 | 173713.9787 | 714.9252976 |
| RNDR4b_num4       | 258.19<br>47 | 173713.9787 | 672.8022638 | 173713.9787 | 672.8022638 |
| UDPGALPpp         | 60.824       | 15095.45394 | 248.1825256 | 15095.45394 | 248.1825256 |
| UACGAMPpp         | 60.824       | 11672.57338 | 191.9073619 | 11672.57338 | 191.9073619 |
| UACGALPpp         | 60.824       | 13846.87087 | 227.6547229 | 13846.87087 | 227.6547229 |
| UGLCURPpp         | 60.824       | 14359.62176 | 236.0847982 | 14359.62176 | 236.0847982 |
| FEROpp_num1       | 56.556<br>2  | 9485.933332 | 167.7257901 | 9485.933332 | 167.7257901 |
| FEROpp_num2       | 443.88<br>07 | 9485.933332 | 21.37045682 | 9485.933332 | 21.37045682 |
| AM4PCP            | 33.567<br>5  | 54473.38639 | 1622.801412 | 54473.38639 | 1622.801412 |
| AM3PA             | 20.536<br>2  | 9367.161455 | 456.1292476 | 9367.161455 | 456.1292476 |
| UM4PCP            | 33.567<br>5  | 9321.330906 | 277.6891608 | 9321.330906 | 277.6891608 |
| CBLAT             | 21.998<br>9  | 9949.384616 | 452.2673687 | 9949.384616 | 452.2673687 |
| TDP               | 17.432<br>9  | 157841.5063 | 9054.231155 | 157841.5063 | 9054.231155 |

|                     |              |             |             |             |             |
|---------------------|--------------|-------------|-------------|-------------|-------------|
| 3PEPTabcpp_num<br>1 | 206.84<br>69 | 26082.63514 | 126.0963309 | 26082.63514 | 126.0963309 |
| 3PEPTabcpp_num<br>2 | 200.75<br>13 | 26082.63514 | 129.925112  | 26082.63514 | 129.925112  |
| 3PEPTabcpp_num<br>3 | 201.75       | 26082.63514 | 129.2819586 | 26082.63514 | 129.2819586 |
| 4PEPTabcpp_num<br>1 | 201.75       | 49599.60815 | 245.8468805 | 49599.60815 | 245.8468805 |
| 4PEPTabcpp_num<br>2 | 206.84<br>69 | 49599.60815 | 239.7889847 | 49599.60815 | 239.7889847 |
| AGM3Pt2pp           | 53.245<br>2  | 14196.18975 | 266.619146  | 14196.18975 | 266.619146  |
| AGM4Pt2pp           | 53.245<br>2  | 37678.09115 | 707.6335735 | 37678.09115 | 707.6335735 |
| AGMt2pp             | 53.245<br>2  | 34185.31625 | 642.0356436 | 34185.31625 | 642.0356436 |
| FEOXAMR1            | 30.112<br>8  | 26079.92347 | 866.0743429 | 26079.92347 | 866.0743429 |
| FEOXAMR2            | 30.112<br>8  | 10115.68801 | 335.9265165 | 10115.68801 | 335.9265165 |
| FEOXAMR3            | 30.112<br>8  | 57714.15197 | 1916.598655 | 57714.15197 | 1916.598655 |
| PTHRpp_num1         | 104.41<br>42 | 21548.48395 | 206.3750328 | 21548.48395 | 206.3750328 |
| PTHRpp_num2         | 98.877<br>2  | 21548.48395 | 217.9317775 | 21548.48395 | 217.9317775 |
| ARABDI              | 389.86       | 86322.63719 | 221.4195793 | 86322.63719 | 221.4195793 |
| R5PPpp_num1         | 104.41<br>42 | 23570.47054 | 225.7400865 | 23570.47054 | 225.7400865 |
| R5PPpp_num2         | 98.877<br>2  | 23570.47054 | 238.3812501 | 23570.47054 | 238.3812501 |
| PSP_Lpp_num1        | 104.41<br>42 | 23226.39009 | 222.444745  | 23226.39009 | 222.444745  |
| PSP_Lpp_num2        | 98.877<br>2  | 23226.39009 | 234.9013736 | 23226.39009 | 234.9013736 |
| TYRPPp              | 104.41<br>42 | 9537.079284 | 91.33891065 | 9537.079284 | 91.33891065 |
| PAPSR2_num1         | 80.301<br>9  | 25460.24801 | 317.0566078 | 25460.24801 | 317.0566078 |
| PAPSR2_num2         | 65.089<br>1  | 25460.24801 | 391.1599333 | 25460.24801 | 391.1599333 |
| PAPSR2_num3         | 65.636<br>5  | 25460.24801 | 387.8977096 | 25460.24801 | 387.8977096 |

|                   |              |             |             |             |             |
|-------------------|--------------|-------------|-------------|-------------|-------------|
| PAPSR2_num4       | 81.709<br>2  | 25460.24801 | 311.5958547 | 25460.24801 | 311.5958547 |
| GRXR_num1         | 25.757<br>5  | 11950.26729 | 463.9529181 | 11950.26729 | 463.9529181 |
| GRXR_num2         | 24.350<br>2  | 11950.26729 | 490.7666996 | 11950.26729 | 490.7666996 |
| GRXR_num3         | 9.1375       | 11950.26729 | 1307.826789 | 11950.26729 | 1307.826789 |
| GRXR_num4         | 9.6849       | 11950.26729 | 1233.907143 | 11950.26729 | 1233.907143 |
| RNDR1b_num1       | 243.52<br>94 | 22837.66644 | 93.7778619  | 22837.66644 | 93.7778619  |
| RNDR1b_num2       | 258.19<br>47 | 22837.66644 | 88.45133708 | 22837.66644 | 88.45133708 |
| RNDR1b_num3       | 242.98<br>2  | 22837.66644 | 93.98912859 | 22837.66644 | 93.98912859 |
| RNDR1b_num4       | 259.60<br>2  | 22837.66644 | 87.97184322 | 22837.66644 | 87.97184322 |
| RNDR2b_num1       | 259.60<br>2  | 27735.00971 | 106.8366565 | 27735.00971 | 106.8366565 |
| RNDR2b_num2       | 243.52<br>94 | 27735.00971 | 113.8877265 | 27735.00971 | 113.8877265 |
| RNDR2b_num3       | 258.19<br>47 | 27735.00971 | 107.4189738 | 27735.00971 | 107.4189738 |
| RNDR2b_num4       | 242.98<br>2  | 27735.00971 | 114.1442975 | 27735.00971 | 114.1442975 |
| FACOA181          | 127.86<br>53 | 28297.73827 | 221.3089733 | 28297.73827 | 221.3089733 |
| FACOA160          | 127.86<br>53 | 129600      | 1013.56662  | 129600      | 1013.56662  |
| FACOA140          | 127.86<br>53 | 63347.75856 | 495.4257219 | 63347.75856 | 495.4257219 |
| AAMYL             | 56.639<br>4  | 23490.41652 | 414.7363235 | 23490.41652 | 414.7363235 |
| AAMYLpp           | 75.712<br>7  | 49598.11858 | 655.0832103 | 49598.11858 | 655.0832103 |
| FACOAL80t2pp_num1 | 124.66<br>4  | 17459.32014 | 140.0510183 | 17459.32014 | 140.0510183 |
| FACOAL80t2pp_num2 | 60.773<br>1  | 17459.32014 | 287.2869763 | 17459.32014 | 287.2869763 |
| PPGPPDP           | 79.342<br>4  | 90720.84686 | 1143.409411 | 90720.84686 | 1143.409411 |
| 23PDE2pp          | 70.832<br>2  | 52628.11949 | 742.9971043 | 52628.11949 | 742.9971043 |
| 23PDE4pp          | 70.832       | 48310.69378 | 682.0442366 | 48310.69378 | 682.0442366 |

|                   |              |             |             |             |             |
|-------------------|--------------|-------------|-------------|-------------|-------------|
|                   | 2            |             |             |             |             |
| 23PDE9pp          | 70.832<br>2  | 43543.38935 | 614.7400384 | 43543.38935 | 614.7400384 |
| SARCOX            | 40.902       | 18240.21953 | 445.9493307 | 18240.21953 | 445.9493307 |
| MN6PP_num1        | 29.721<br>1  | 11553.01474 | 388.7142381 | 11553.01474 | 388.7142381 |
| MN6PP_num2        | 30.412<br>8  | 11553.01474 | 379.873433  | 11553.01474 | 379.873433  |
| MN6PP_num3        | 24.330<br>2  | 11553.01474 | 474.8425719 | 11553.01474 | 474.8425719 |
| MN6PP_num4        | 29.707<br>7  | 11553.01474 | 388.8895722 | 11553.01474 | 388.8895722 |
| 3KGK              | 110.30<br>97 | 46839.28669 | 424.6162096 | 46839.28669 | 424.6162096 |
| F6PP_num1         | 23.007<br>5  | 18699.03043 | 812.7363003 | 18699.03043 | 812.7363003 |
| F6PP_num2         | 29.721<br>1  | 18699.03043 | 629.1500122 | 18699.03043 | 629.1500122 |
| F6PP_num3         | 30.412<br>8  | 18699.03043 | 614.8408048 | 18699.03043 | 614.8408048 |
| F6PP_num4         | 20.779<br>8  | 18699.03043 | 899.8657556 | 18699.03043 | 899.8657556 |
| F6PP_num5         | 29.707<br>7  | 18699.03043 | 629.4337976 | 18699.03043 | 629.4337976 |
| GDPMNH            | 36.547       | 111348.1079 | 3046.709932 | 111348.1079 | 3046.709932 |
| FACOAL60t2pp_num1 | 124.66<br>4  | 24310.91002 | 195.011471  | 24310.91002 | 195.011471  |
| FACOAL60t2pp_num2 | 60.773<br>1  | 24310.91002 | 400.0274796 | 24310.91002 | 400.0274796 |
| GDPDPK_num1       | 83.875<br>6  | 40330.37894 | 480.8356536 | 40330.37894 | 480.8356536 |
| GDPDPK_num2       | 79.342<br>4  | 40330.37894 | 508.3080288 | 40330.37894 | 508.3080288 |
| R15BPK            | 20.729<br>6  | 17862.19588 | 861.6758585 | 17862.19588 | 861.6758585 |
| GGPTRCS           | 638.12<br>59 | 10428.39012 | 16.34221415 | 10428.39012 | 16.34221415 |
| FRULYSDG          | 462.83<br>08 | 41650.55762 | 89.99089435 | 41650.55762 | 89.99089435 |
| ASNNpp            | 147.40<br>28 | 56027.20568 | 380.095939  | 56027.20568 | 380.095939  |
| GLUNpp            | 147.40<br>28 | 20661.07493 | 140.1674523 | 20661.07493 | 140.1674523 |

|              |              |             |             |             |             |
|--------------|--------------|-------------|-------------|-------------|-------------|
| NTD12_num1   | 25.398<br>8  | 9521.232462 | 374.8693821 | 9521.232462 | 374.8693821 |
| NTD12_num2   | 26.900<br>4  | 9521.232462 | 353.943899  | 9521.232462 | 353.943899  |
| NTD12_num3   | 45.416<br>1  | 9521.232462 | 209.6444314 | 9521.232462 | 209.6444314 |
| NTD12_num4   | 20.255<br>4  | 9521.232462 | 470.0589701 | 9521.232462 | 470.0589701 |
| DNTPPA_num1  | 17.305<br>8  | 9493.606192 | 548.5794469 | 9493.606192 | 548.5794469 |
| DNTPPA_num2  | 14.927<br>1  | 9493.606192 | 635.9980299 | 9493.606192 | 635.9980299 |
| NTPP9        | 42.077<br>7  | 219466.3262 | 5215.739601 | 219466.3262 | 5215.739601 |
| NTPP10       | 42.077<br>7  | 25719.40426 | 611.2359815 | 25719.40426 | 611.2359815 |
| NTPP11       | 42.077<br>7  | 9764.884213 | 232.0679175 | 9764.884213 | 232.0679175 |
| NTD10pp_num1 | 104.41<br>42 | 16669.85067 | 159.6511841 | 16669.85067 | 159.6511841 |
| NTD10pp_num2 | 60.824       | 16669.85067 | 274.0669912 | 16669.85067 | 274.0669912 |
| NTD1pp_num1  | 60.824       | 18062.0881  | 296.9565977 | 18062.0881  | 296.9565977 |
| NTD1pp_num2  | 104.41<br>42 | 18062.0881  | 172.9849781 | 18062.0881  | 172.9849781 |
| NTD2pp_num1  | 60.824       | 28742.74164 | 472.555926  | 28742.74164 | 472.555926  |
| NTD2pp_num2  | 104.41<br>42 | 28742.74164 | 275.2761755 | 28742.74164 | 275.2761755 |
| NTD2pp_num3  | 98.877<br>2  | 28742.74164 | 290.6912983 | 28742.74164 | 290.6912983 |
| NTD3pp_num1  | 60.824       | 17056.30725 | 280.4206769 | 17056.30725 | 280.4206769 |
| NTD3pp_num2  | 104.41<br>42 | 17056.30725 | 163.3523721 | 17056.30725 | 163.3523721 |
| NTD4pp_num1  | 104.41<br>42 | 16503.42699 | 158.0573044 | 16503.42699 | 158.0573044 |
| NTD4pp_num2  | 60.824       | 16503.42699 | 271.3308397 | 16503.42699 | 271.3308397 |
| NTD4pp_num3  | 98.877<br>2  | 16503.42699 | 166.9083165 | 16503.42699 | 166.9083165 |
| NTD5pp_num1  | 104.41<br>42 | 18932.08788 | 181.3171761 | 18932.08788 | 181.3171761 |
| NTD5pp_num2  | 60.824       | 18932.08788 | 311.2601585 | 18932.08788 | 311.2601585 |
| NTD6pp_num1  | 60.824       | 18118.8497  | 297.8898083 | 18118.8497  | 297.8898083 |
| NTD6pp_num2  | 104.41<br>42 | 18118.8497  | 173.5285976 | 18118.8497  | 173.5285976 |

|                    |              |             |             |             |             |
|--------------------|--------------|-------------|-------------|-------------|-------------|
| NTD7pp_num1        | 104.41<br>42 | 16283.31909 | 155.9492779 | 16283.31909 | 155.9492779 |
| NTD7pp_num2        | 60.824       | 16283.31909 | 267.7120723 | 16283.31909 | 267.7120723 |
| NTD7pp_num3        | 98.877<br>2  | 16283.31909 | 164.6822431 | 16283.31909 | 164.6822431 |
| NTD9pp_num1        | 104.41<br>42 | 17969.26403 | 172.0959796 | 17969.26403 | 172.0959796 |
| NTD9pp_num2        | 60.824       | 17969.26403 | 295.4304885 | 17969.26403 | 295.4304885 |
| NTD9pp_num3        | 98.877<br>2  | 17969.26403 | 181.73314   | 17969.26403 | 181.73314   |
| PEAMNOpp           | 168.75<br>73 | 25099.97591 | 148.7341639 | 25099.97591 | 148.7341639 |
| GAL1PPpp           | 91.365<br>8  | 49931.64198 | 546.5025423 | 49931.64198 | 546.5025423 |
| ARGDCpp            | 295.59<br>38 | 11541.49804 | 39.04512896 | 11541.49804 | 39.04512896 |
| ALLPI              | 32.146<br>6  | 19201.33747 | 597.3053906 | 19201.33747 | 597.3053906 |
| ALLK               | 33.820<br>9  | 23208.86213 | 686.2284012 | 23208.86213 | 686.2284012 |
| ALLULPE            | 26.109<br>2  | 28397.97262 | 1087.661538 | 28397.97262 | 1087.661538 |
| FACOAL100t2pp_num1 | 124.66<br>4  | 19405.05356 | 155.6588395 | 19405.05356 | 155.6588395 |
| FACOAL100t2pp_num2 | 60.773<br>1  | 19405.05356 | 319.3033359 | 19405.05356 | 319.3033359 |
| GPDDA3pp           | 81.686<br>7  | 36706.06811 | 449.3518297 | 36706.06811 | 449.3518297 |
| GPDDA4pp           | 81.686<br>7  | 41144.26043 | 503.6837138 | 41144.26043 | 503.6837138 |
| GPDDA2pp           | 81.686<br>7  | 41162.26921 | 503.9041755 | 41162.26921 | 503.9041755 |
| FACOAL120t2pp_num1 | 60.773<br>1  | 19622.55997 | 322.8823274 | 19622.55997 | 322.8823274 |
| FACOAL120t2pp_num2 | 124.66<br>4  | 19622.55997 | 157.4035806 | 19622.55997 | 157.4035806 |
| FACOAL140t2pp_num1 | 60.773<br>1  | 15392.79644 | 253.2830551 | 15392.79644 | 253.2830551 |
| FACOAL140t2pp_num2 | 124.66<br>4  | 15392.79644 | 123.4742703 | 15392.79644 | 123.4742703 |
| HCYSMT2            | 33.422<br>8  | 9603.528682 | 287.3346542 | 9603.528682 | 287.3346542 |
| ACGK               | 54.319       | 30240       | 556.7102548 | 30240       | 556.7102548 |

|              |              |             |             |             |             |
|--------------|--------------|-------------|-------------|-------------|-------------|
|              | 1            |             |             |             |             |
| DHPTPE       | 112.65<br>63 | 17759.95224 | 157.6472176 | 17759.95224 | 157.6472176 |
| NADPHQR2     | 43.781<br>8  | 27721.05118 | 633.1638074 | 27721.05118 | 633.1638074 |
| NADPHQR3     | 43.781<br>8  | 30528.29321 | 697.2827341 | 30528.29321 | 697.2827341 |
| NADPHQR4     | 43.781<br>8  | 16809.95379 | 383.9484394 | 16809.95379 | 383.9484394 |
| GLBRAN2      | 84.336<br>9  | 221256.5004 | 2623.483913 | 221256.5004 | 2623.483913 |
| ASR          | 40.203<br>5  | 16666.55749 | 414.5548894 | 16666.55749 | 414.5548894 |
| ECAtp        | 44.959<br>7  | 86843.56536 | 1931.586851 | 86843.56536 | 1931.586851 |
| O16AT        | 21.675<br>1  | 23247.17566 | 1072.529108 | 23247.17566 | 1072.529108 |
| O16GALFT     | 37.757<br>2  | 22063.75587 | 584.3589003 | 22063.75587 | 584.3589003 |
| O16AUNDtp    | 45.382<br>6  | 56567.01265 | 1246.447155 | 56567.01265 | 1246.447155 |
| O16AP1pp     | 81.199       | 18394.40465 | 226.5348668 | 18394.40465 | 226.5348668 |
| AGM4PCP      | 33.567<br>5  | 46441.37344 | 1383.521961 | 46441.37344 | 1383.521961 |
| 4PCP         | 33.567<br>5  | 27706.1783  | 825.3870052 | 27706.1783  | 825.3870052 |
| 4PCPpp       | 21.039<br>9  | 37289.77556 | 1772.33616  | 37289.77556 | 1772.33616  |
| FALDH2       | 78.718       | 29317.27206 | 372.4341581 | 29317.27206 | 372.4341581 |
| CBIAT        | 21.998<br>9  | 17689.46963 | 804.1070066 | 17689.46963 | 804.1070066 |
| PPDOy        | 37.978<br>4  | 27609.90566 | 726.989701  | 27609.90566 | 726.989701  |
| NTD12pp_num1 | 60.824       | 17007.54339 | 279.6189561 | 17007.54339 | 279.6189561 |
| NTD12pp_num2 | 104.41<br>42 | 17007.54339 | 162.8853488 | 17007.54339 | 162.8853488 |
| PPA2_num1    | 116.27<br>19 | 9737.917049 | 83.75125072 | 9737.917049 | 83.75125072 |
| PPA2_num2    | 26.900<br>4  | 9737.917049 | 361.9989684 | 9737.917049 | 361.9989684 |
| 3NTD7pp_num1 | 70.832<br>2  | 55966.42332 | 790.1268536 | 55966.42332 | 790.1268536 |
| 3NTD7pp_num2 | 98.877       | 55966.42332 | 566.0195001 | 55966.42332 | 566.0195001 |

|                   |              |             |             |             |             |
|-------------------|--------------|-------------|-------------|-------------|-------------|
|                   | 2            |             |             |             |             |
| 3NTD4pp_num1      | 98.877<br>2  | 46917.55912 | 474.5033144 | 46917.55912 | 474.5033144 |
| 3NTD4pp_num2      | 70.832<br>2  | 46917.55912 | 662.3761385 | 46917.55912 | 662.3761385 |
| 3NTD4pp_num3      | 98.877<br>2  | 46917.55912 | 474.5033144 | 46917.55912 | 474.5033144 |
| 3NTD2pp_num1      | 70.832<br>2  | 44836.48256 | 632.9957641 | 44836.48256 | 632.9957641 |
| 3NTD2pp_num2      | 98.877<br>2  | 44836.48256 | 453.4562322 | 44836.48256 | 453.4562322 |
| 3NTD9pp_num1      | 70.832<br>2  | 39469.58003 | 557.226516  | 39469.58003 | 557.226516  |
| 3NTD9pp_num2      | 98.877<br>2  | 39469.58003 | 399.1777683 | 39469.58003 | 399.1777683 |
| 23PDE7pp          | 70.832<br>2  | 57434.65448 | 810.8551546 | 57434.65448 | 810.8551546 |
| HSTPT             | 78.720<br>3  | 11880       | 150.914059  | 11880       | 150.914059  |
| THDPS             | 59.784<br>2  | 8640        | 144.5197895 | 8640        | 144.5197895 |
| ACONMT            | 29.006       | 176845.203  | 6096.849032 | 176845.203  | 6096.849032 |
| GNK_num1          | 39.086<br>6  | 26754.97352 | 684.50501   | 26754.97352 | 684.50501   |
| GNK_num2          | 21.004       | 26754.97352 | 1273.803729 | 26754.97352 | 1273.803729 |
| HMBS              | 33.851<br>8  | 468         | 13.82496647 | 468         | 13.82496647 |
| RMK               | 54.069       | 33912.96639 | 627.216453  | 33912.96639 | 627.216453  |
| FHL_num1          | 467.42<br>48 | 166094.0433 | 355.3385343 | 166094.0433 | 355.3385343 |
| FHL_num2          | 311.49<br>24 | 166094.0433 | 533.2202113 | 166094.0433 | 533.2202113 |
| MEPCT             | 51.474<br>5  | 12960       | 251.7751508 | 12960       | 251.7751508 |
| GLUDy             | 291.48<br>82 | 180117.9189 | 617.9252503 | 180117.9189 | 617.9252503 |
| GLYCLTDy_num<br>1 | 35.343<br>4  | 62636.42448 | 1772.224078 | 62636.42448 | 1772.224078 |
| GLYCLTDy_num<br>2 | 70.791       | 62636.42448 | 884.8077366 | 62636.42448 | 884.8077366 |
| LYSDC_num1        | 805.90<br>3  | 11370.9205  | 14.10953986 | 11370.9205  | 14.10953986 |
| LYSDC_num2        | 812.60       | 11370.9205  | 13.99323617 | 11370.9205  | 13.99323617 |

|            |              |             |             |             |             |
|------------|--------------|-------------|-------------|-------------|-------------|
|            | 12           |             |             |             |             |
| DAAD       | 95.214<br>6  | 27473.02376 | 288.5379318 | 27473.02376 | 288.5379318 |
| NTPP5_num1 | 17.305<br>8  | 21294.56777 | 1230.487338 | 21294.56777 | 1230.487338 |
| NTPP5_num2 | 60.824<br>6  | 21294.56777 | 350.09795   | 21294.56777 | 350.09795   |
| NTD3_num1  | 45.416<br>1  | 11259.28806 | 247.9140229 | 11259.28806 | 247.9140229 |
| NTD3_num2  | 26.900<br>4  | 11259.28806 | 418.5546705 | 11259.28806 | 418.5546705 |
| NTD3_num3  | 20.255<br>4  | 11259.28806 | 555.8659941 | 11259.28806 | 555.8659941 |
| GLYOX      | 28.434<br>4  | 10623.00336 | 373.5968884 | 10623.00336 | 373.5968884 |
| MTRPOX     | 40.902       | 11031.88203 | 269.714978  | 11031.88203 | 269.714978  |
| AGM4PCPpp  | 21.039<br>9  | 34105.01658 | 1620.968568 | 34105.01658 | 1620.968568 |
| GTPDPDP    | 109.74<br>23 | 11616.65916 | 105.8539793 | 11616.65916 | 105.8539793 |
| RNDR2_num1 | 270.39<br>17 | 10997.84578 | 40.67375506 | 10997.84578 | 40.67375506 |
| RNDR2_num2 | 274.13<br>99 | 10997.84578 | 40.11763985 | 10997.84578 | 40.11763985 |
| XAND       | 129.79<br>94 | 65517.63512 | 504.7606932 | 65517.63512 | 504.7606932 |
| HACD3_num1 | 159.18<br>78 | 39593.4512  | 248.7216433 | 39593.4512  | 248.7216433 |
| HACD3_num2 | 77.072<br>2  | 39593.4512  | 513.7189701 | 39593.4512  | 513.7189701 |
| NNDMBRT    | 73.974       | 31557.09164 | 426.5970697 | 31557.09164 | 426.5970697 |
| THRA2_num1 | 90.633<br>2  | 17869.47753 | 197.1626018 | 17869.47753 | 197.1626018 |
| THRA2_num2 | 145.97<br>88 | 17869.47753 | 122.4114565 | 17869.47753 | 122.4114565 |
| PPK        | 160.86<br>3  | 29958.53743 | 186.2363466 | 29958.53743 | 186.2363466 |
| ABUTD      | 203.32       | 38704.04507 | 190.3602453 | 38704.04507 | 190.3602453 |
| E4PD_num1  | 149.19<br>76 | 9322.452155 | 62.48392839 | 9322.452155 | 62.48392839 |
| E4PD_num2  | 142.13       | 9322.452155 | 65.59102339 | 9322.452155 | 65.59102339 |
| IG3PS      | 50.107<br>3  | 32266.5357  | 643.9487999 | 32266.5357  | 643.9487999 |

|             |              |             |             |             |             |
|-------------|--------------|-------------|-------------|-------------|-------------|
| DADK        | 23.586       | 15176.86818 | 643.4693541 | 15176.86818 | 643.4693541 |
| DUTPDP_num1 | 48.466<br>4  | 13211.96805 | 272.6005655 | 13211.96805 | 272.6005655 |
| DUTPDP_num2 | 16.370<br>7  | 13211.96805 | 807.0496708 | 13211.96805 | 807.0496708 |
| NTP5        | 39.193<br>3  | 30671.51304 | 782.5703128 | 30671.51304 | 782.5703128 |
| MTAN        | 48.707<br>9  | 9431.398224 | 193.6317974 | 9431.398224 | 193.6317974 |
| DPR_num1    | 33.870<br>8  | 9584.979242 | 282.9865029 | 9584.979242 | 282.9865029 |
| DPR_num2    | 216.27<br>61 | 9584.979242 | 44.3182545  | 9584.979242 | 44.3182545  |
| THRD_L_num1 | 224.78<br>1  | 57035.45056 | 253.7378629 | 57035.45056 | 253.7378629 |
| THRD_L_num2 | 140.92<br>96 | 57035.45056 | 404.7088089 | 57035.45056 | 404.7088089 |
| NAMNPP      | 45.897<br>3  | 9308.69978  | 202.8158471 | 9308.69978  | 202.8158471 |
| SELNPS      | 73.374<br>5  | 91807.86884 | 1251.223093 | 91807.86884 | 1251.223093 |
| CRNCAR      | 28.190<br>2  | 203054.0799 | 7203.002458 | 203054.0799 | 7203.002458 |
| ANHMK       | 39.496<br>3  | 21852.99274 | 553.29215   | 21852.99274 | 553.29215   |
| DHFR_num1   | 26.348<br>3  | 17578.90389 | 667.1741209 | 17578.90389 | 667.1741209 |
| DHFR_num2   | 17.999<br>4  | 17578.90389 | 976.6383262 | 17578.90389 | 976.6383262 |
| PRAIi       | 49.492<br>3  | 18000       | 363.6929381 | 18000       | 363.6929381 |
| TYRTA_num1  | 87.146<br>7  | 69547.95976 | 798.0561485 | 69547.95976 | 798.0561485 |
| TYRTA_num2  | 87.075<br>6  | 69547.95976 | 798.7077868 | 69547.95976 | 798.7077868 |
| TYRTA_num3  | 204.56<br>19 | 69547.95976 | 339.9849129 | 69547.95976 | 339.9849129 |
| SHKK_num1   | 19.538       | 61262.15929 | 3135.538914 | 61262.15929 | 3135.538914 |
| SHKK_num2   | 19.150<br>8  | 61262.15929 | 3198.934733 | 61262.15929 | 3198.934733 |
| SADH        | 98.597<br>1  | 62717.07204 | 636.09449   | 62717.07204 | 636.09449   |
| GLUSy       | 861.24       | 135501.647  | 157.331558  | 135501.647  | 157.331558  |

|              |               |             |             |             |             |
|--------------|---------------|-------------|-------------|-------------|-------------|
|              | 9             |             |             |             |             |
| GUAPRT_num1  | 80.461        | 17179.19996 | 213.5096501 | 17179.19996 | 213.5096501 |
| GUAPRT_num2  | 67.882<br>4   | 17179.19996 | 253.0729609 | 17179.19996 | 253.0729609 |
| PDH          | 4586.6<br>113 | 270261.5203 | 58.92400786 | 3596400     | 784.1083024 |
| DMSOR2pp     | 129.25<br>04  | 79462.90645 | 614.7981473 | 79462.90645 | 614.7981473 |
| HYD3pp_num1  | 482.93<br>35  | 29005.97007 | 60.06203767 | 29005.97007 | 60.06203767 |
| HYD3pp_num2  | 181.74<br>82  | 29005.97007 | 159.5942632 | 29005.97007 | 159.5942632 |
| NO3R1pp_num1 | 250.96<br>3   | 401469.1895 | 1599.714657 | 401469.1895 | 1599.714657 |
| NO3R1pp_num2 | 474.55<br>52  | 401469.1895 | 845.990497  | 401469.1895 | 845.990497  |
| AACPS5       | 89.339<br>5   | 9300.08354  | 104.0982269 | 9300.08354  | 104.0982269 |
| NTD8_num1    | 25.398<br>8   | 9939.384184 | 391.3328261 | 9939.384184 | 391.3328261 |
| NTD8_num2    | 26.900<br>4   | 9939.384184 | 369.4883416 | 9939.384184 | 369.4883416 |
| NTD8_num3    | 45.416<br>1   | 9939.384184 | 218.8515567 | 9939.384184 | 218.8515567 |
| NTD8_num4    | 20.255<br>4   | 9939.384184 | 490.7029327 | 9939.384184 | 490.7029327 |
| GALCTD       | 56.401<br>6   | 72941.9405  | 1293.260129 | 72941.9405  | 1293.260129 |
| MLTG4        | 69.041        | 40858.37928 | 591.7987758 | 40858.37928 | 591.7987758 |
| UDPGDC       | 445.73<br>33  | 10429.01417 | 23.39743108 | 10429.01417 | 23.39743108 |
| PUNP4_num1   | 179.00<br>77  | 15875.68535 | 88.68716457 | 15875.68535 | 88.68716457 |
| PUNP4_num2   | 155.69<br>95  | 15875.68535 | 101.9636245 | 15875.68535 | 101.9636245 |
| AMAOTr       | 94.671<br>2   | 3.6         | 0.038026348 | 3.6         | 0.038026348 |
| NTD11pp_num1 | 60.824        | 16148.02293 | 265.4876846 | 16148.02293 | 265.4876846 |
| NTD11pp_num2 | 104.41<br>42  | 16148.02293 | 154.6535139 | 16148.02293 | 154.6535139 |
| DKGLCNR2x    | 70.791        | 19157.06075 | 270.6143542 | 19157.06075 | 270.6143542 |
| ACGS         | 295.17<br>11  | 820800      | 2780.760041 | 820800      | 2780.760041 |

|                   |              |             |             |             |             |
|-------------------|--------------|-------------|-------------|-------------|-------------|
| PDE1_num1         | 180.52<br>08 | 123619.6494 | 684.7944915 | 123619.6494 | 684.7944915 |
| PDE1_num2         | 30.938       | 123619.6494 | 3995.722071 | 123619.6494 | 3995.722071 |
| MCITD             | 53.951<br>8  | 37457.91464 | 694.2847995 | 37457.91464 | 694.2847995 |
| GLCATr            | 60.288       | 10408.43895 | 172.6452851 | 10408.43895 | 172.6452851 |
| ALAALAr_num1      | 39.315<br>8  | 17736.16695 | 451.1205916 | 17736.16695 | 451.1205916 |
| ALAALAr_num2      | 65.679<br>4  | 17736.16695 | 270.0415496 | 17736.16695 | 270.0415496 |
| ACACT1r_num1      | 46.530<br>5  | 64745.49694 | 1391.463598 | 64745.49694 | 1391.463598 |
| ACACT1r_num2      | 161.40<br>99 | 64745.49694 | 401.1246952 | 64745.49694 | 401.1246952 |
| ACACT1r_num3      | 81.752<br>4  | 64745.49694 | 791.9705958 | 64745.49694 | 791.9705958 |
| G2PPpp_num1       | 104.41<br>42 | 26350.74038 | 252.3674019 | 26350.74038 | 252.3674019 |
| G2PPpp_num2       | 98.877<br>2  | 26350.74038 | 266.499662  | 26350.74038 | 266.499662  |
| AGM3PApp_num<br>1 | 45.634<br>4  | 23614.90817 | 517.4804132 | 23614.90817 | 517.4804132 |
| AGM3PApp_num<br>2 | 47.985<br>2  | 23614.90817 | 492.1289932 | 23614.90817 | 492.1289932 |
| AGM3PApp_num<br>3 | 31.412<br>1  | 23614.90817 | 751.7774414 | 23614.90817 | 751.7774414 |
| AGM3PApp_num<br>4 | 31.072<br>4  | 23614.90817 | 759.9962722 | 23614.90817 | 759.9962722 |
| SUCOAS            | 142.34<br>03 | 28613.05984 | 201.0186844 | 28613.05984 | 201.0186844 |
| NTP1_num1         | 61.986<br>3  | 27027.32662 | 436.0209694 | 27027.32662 | 436.0209694 |
| NTP1_num2         | 39.193<br>3  | 27027.32662 | 689.5904815 | 27027.32662 | 689.5904815 |
| GALKr             | 41.442<br>1  | 44343.2048  | 1070.003808 | 44343.2048  | 1070.003808 |
| PANTS             | 63.195<br>3  | 72          | 1.139325235 | 72          | 1.139325235 |
| YUMPS             | 98.729<br>7  | 17972.16522 | 182.0340305 | 17972.16522 | 182.0340305 |
| DHQS              | 38.881       | 280800      | 7222.03647  | 280800      | 7222.03647  |
| PGCD              | 176.70<br>31 | 72000       | 407.4631401 | 72000       | 407.4631401 |

|            |              |             |             |             |             |
|------------|--------------|-------------|-------------|-------------|-------------|
| ADSL1r     | 206.17<br>12 | 36000       | 174.612167  | 36000       | 174.612167  |
| SERD_D     | 47.900<br>6  | 27507.13332 | 574.2544629 | 27507.13332 | 574.2544629 |
| AICART     | 57.329<br>2  | 36000       | 627.9522477 | 36000       | 627.9522477 |
| PFK_num1   | 139.36<br>82 | 1000800     | 7180.978157 | 1000800     | 7180.978157 |
| PFK_num2   | 64.912       | 1000800     | 15417.7964  | 1000800     | 15417.7964  |
| PGM_num1   | 57.112<br>8  | 164087.7094 | 2873.046138 | 164087.7094 | 2873.046138 |
| PGM_num2   | 56.193<br>9  | 164087.7094 | 2920.027075 | 164087.7094 | 2920.027075 |
| TPI        | 53.943<br>6  | 259200      | 4805.018575 | 259200      | 4805.018575 |
| RPI_num1   | 45.720<br>8  | 71002.38272 | 1552.955826 | 71002.38272 | 1552.955826 |
| RPI_num2   | 32.146<br>6  | 71002.38272 | 2208.705827 | 71002.38272 | 2208.705827 |
| PERD       | 82.735<br>3  | 72          | 0.870245228 | 72          | 0.870245228 |
| PYDAMK     | 61.694<br>8  | 9300.695926 | 150.75332   | 9300.695926 | 150.75332   |
| FADRx2     | 530.15<br>87 | 51368.76695 | 96.89318868 | 51368.76695 | 96.89318868 |
| PDE4       | 180.52<br>08 | 64875.80671 | 359.3813384 | 64875.80671 | 359.3813384 |
| AGM4PH     | 37.594<br>7  | 9954.435204 | 264.7829403 | 9954.435204 | 264.7829403 |
| AM4PA      | 20.536<br>2  | 20712.18859 | 1008.569677 | 20712.18859 | 1008.569677 |
| ATHRDHr    | 108.99<br>57 | 13509.71589 | 123.9472373 | 13509.71589 | 123.9472373 |
| LSERDHr    | 108.99<br>57 | 14125.37111 | 129.5956732 | 14125.37111 | 129.5956732 |
| DSERDHr    | 108.99<br>57 | 15835.52183 | 145.2857482 | 15835.52183 | 145.2857482 |
| OBTFL_num1 | 198.91<br>87 | 21920.42484 | 110.1979092 | 21920.42484 | 110.1979092 |
| OBTFL_num2 | 213.20<br>29 | 21920.42484 | 102.8148531 | 21920.42484 | 102.8148531 |
| OBTFL_num3 | 114.13<br>98 | 21920.42484 | 192.0489158 | 21920.42484 | 192.0489158 |

|           |              |             |             |             |             |
|-----------|--------------|-------------|-------------|-------------|-------------|
| G6PP_num1 | 29.707<br>7  | 9870.743437 | 332.2621218 | 9870.743437 | 332.2621218 |
| G6PP_num2 | 30.412<br>8  | 9870.743437 | 324.5588514 | 9870.743437 | 324.5588514 |
| G6PP_num3 | 23.007<br>5  | 9870.743437 | 429.0228594 | 9870.743437 | 429.0228594 |
| MMCD      | 175.03<br>55 | 22988.03684 | 131.3335685 | 22988.03684 | 131.3335685 |
| GLNS      | 622.84<br>51 | 119723.2776 | 192.2199879 | 3596400     | 5774.14834  |
| GTHS      | 142.24<br>36 | 42649.46597 | 299.8339888 | 42649.46597 | 299.8339888 |
| UDPKAAT   | 41.649<br>8  | 10842.16108 | 260.3172422 | 10842.16108 | 260.3172422 |
| ULA4NFT   | 445.73<br>33 | 14287.53528 | 32.05400019 | 14287.53528 | 32.05400019 |
| UPLA4FNT  | 36.339<br>1  | 32384.40508 | 891.1724583 | 32384.40508 | 891.1724583 |
| UPLA4FNF  | 33.111<br>8  | 772257.6065 | 23322.73107 | 772257.6065 | 23322.73107 |
| ULA4Ntppi | 26.277<br>1  | 36865.93205 | 1402.968061 | 36865.93205 | 1402.968061 |
| HEPT1     | 35.543<br>8  | 10345.03235 | 291.0502633 | 10345.03235 | 291.0502633 |
| ALR2_num1 | 30.986<br>6  | 10013.59023 | 323.1587277 | 10013.59023 | 323.1587277 |
| ALR2_num2 | 31.109<br>6  | 10013.59023 | 321.8810345 | 10013.59023 | 321.8810345 |
| ALR2_num3 | 29.436<br>8  | 10013.59023 | 340.172513  | 10013.59023 | 340.172513  |
| ALR2_num4 | 38.832<br>2  | 10013.59023 | 257.8682184 | 10013.59023 | 257.8682184 |
| AMALT2    | 78.503<br>5  | 43134.18746 | 549.4555971 | 43134.18746 | 549.4555971 |
| MLTP1     | 181.04<br>48 | 24684.35694 | 136.3439156 | 24684.35694 | 136.3439156 |
| HEPT2     | 39.042<br>1  | 10836.90288 | 277.5696717 | 10836.90288 | 277.5696717 |
| HXAND     | 129.79<br>94 | 64608.61918 | 497.7574563 | 64608.61918 | 497.7574563 |
| MOAT3C    | 32.920<br>1  | 11125.6214  | 337.9583112 | 11125.6214  | 337.9583112 |
| RHAT1     | 36.730<br>5  | 34002.42145 | 925.72716   | 34002.42145 | 925.72716   |

|              |              |             |             |             |             |
|--------------|--------------|-------------|-------------|-------------|-------------|
| GALT1        | 40.825<br>9  | 95078.50661 | 2328.877174 | 95078.50661 | 2328.877174 |
| GLCTR2       | 39.423<br>2  | 15230.70238 | 386.3385615 | 15230.70238 | 386.3385615 |
| UDPGPpp      | 60.824       | 13977.35334 | 229.7999695 | 13977.35334 | 229.7999695 |
| PPPGO        | 84.905<br>2  | 9913.181558 | 116.7558825 | 9913.181558 | 116.7558825 |
| ADNK1        | 23.586       | 28.8        | 1.221063343 | 28.8        | 1.221063343 |
| HEPK1        | 30.872<br>3  | 20974.87796 | 679.4076878 | 20974.87796 | 679.4076878 |
| HEPT3        | 38.730<br>7  | 22408.29661 | 578.5667859 | 22408.29661 | 578.5667859 |
| HEPK2        | 27.461       | 26010.86203 | 947.19282   | 26010.86203 | 947.19282   |
| ALDD3y_num1  | 36.501<br>8  | 23752.9732  | 650.734298  | 23752.9732  | 650.734298  |
| ALDD3y_num2  | 225.22<br>54 | 23752.9732  | 105.4631192 | 23752.9732  | 105.4631192 |
| ALDD3y_num3  | 84.194       | 23752.9732  | 282.1219232 | 23752.9732  | 282.1219232 |
| R5PP_num1    | 23.007<br>5  | 9881.341639 | 429.4835006 | 9881.341639 | 429.4835006 |
| R5PP_num2    | 20.779<br>8  | 9881.341639 | 475.5263111 | 9881.341639 | 475.5263111 |
| R5PP_num3    | 30.412<br>8  | 9881.341639 | 324.9073298 | 9881.341639 | 324.9073298 |
| R5PP_num4    | 27.163<br>1  | 9881.341639 | 363.7781269 | 9881.341639 | 363.7781269 |
| R5PP_num5    | 29.721<br>1  | 9881.341639 | 332.4689072 | 9881.341639 | 332.4689072 |
| CYSSADS_num1 | 86.468<br>4  | 13159.47439 | 152.188249  | 13159.47439 | 152.188249  |
| CYSSADS_num2 | 88.867<br>5  | 13159.47439 | 148.0797186 | 13159.47439 | 148.0797186 |
| CPPPGO2      | 52.729       | 9383.577178 | 177.9585651 | 9383.577178 | 177.9585651 |
| AGM3PH       | 37.594<br>7  | 9954.457142 | 264.7835238 | 9954.457142 | 264.7835238 |
| LDH_D2       | 64.612<br>3  | 11899.87868 | 184.1735812 | 11899.87868 | 184.1735812 |
| SHCHF        | 99.902<br>8  | 1224        | 12.25190886 | 1224        | 12.25190886 |
| SUCBZL       | 200.73<br>87 | 16127.31824 | 80.33985596 | 16127.31824 | 80.33985596 |
| CYSDDS       | 70.306<br>6  | 27651.34377 | 393.2965578 | 27651.34377 | 393.2965578 |

|                    |             |             |             |             |             |
|--------------------|-------------|-------------|-------------|-------------|-------------|
| NTP10_num1         | 39.193<br>3 | 10200.0983  | 260.251071  | 10200.0983  | 260.251071  |
| NTP10_num2         | 36.425<br>3 | 10200.0983  | 280.027846  | 10200.0983  | 280.027846  |
| PRAIS              | 73.708<br>1 | 36000       | 488.4130781 | 36000       | 488.4130781 |
| GDMANE             | 72.282<br>3 | 130011.786  | 1798.666976 | 130011.786  | 1798.666976 |
| GPDDA4             | 27.409<br>6 | 9300.271378 | 339.3070814 | 9300.271378 | 339.3070814 |
| LPLIPAL2E140       | 38.978<br>3 | 9300.115008 | 238.5972453 | 9300.115008 | 238.5972453 |
| LPLIPAL2E180       | 38.978<br>3 | 21392.64662 | 548.8347778 | 21392.64662 | 548.8347778 |
| LPLIPAL2G161       | 38.978<br>3 | 11808.07575 | 302.939732  | 11808.07575 | 302.939732  |
| LPLIPAL2G181       | 38.978<br>3 | 10096.07048 | 259.0177221 | 10096.07048 | 259.0177221 |
| AACPS6             | 89.339<br>5 | 16920.24286 | 189.3926299 | 16920.24286 | 189.3926299 |
| AACPS7             | 89.339<br>5 | 19220.43512 | 215.1392734 | 19220.43512 | 215.1392734 |
| QMO2               | 23.064<br>8 | 24600.84318 | 1066.596857 | 24600.84318 | 1066.596857 |
| QMO3               | 23.064<br>8 | 33447.80076 | 1450.166521 | 33447.80076 | 1450.166521 |
| LPLIPAL2E141       | 38.978<br>3 | 9300.051788 | 238.5956234 | 9300.051788 | 238.5956234 |
| LPLIPAL2E161       | 38.978<br>3 | 10543.91586 | 270.5073299 | 10543.91586 | 270.5073299 |
| LPLIPAL2E181       | 38.978<br>3 | 9300.052674 | 238.5956461 | 9300.052674 | 238.5956461 |
| LPLIPAL2G180       | 38.978<br>3 | 10096.05001 | 259.017197  | 10096.05001 | 259.017197  |
| LPLIPAL2G141       | 38.978<br>3 | 9300.047494 | 238.5955132 | 9300.047494 | 238.5955132 |
| IPDDI              | 20.508<br>3 | 16631.67284 | 810.972769  | 16631.67284 | 810.972769  |
| 2AGPGAT180         | 80.7        | 9737.355798 | 120.6611623 | 9737.355798 | 120.6611623 |
| 2AGPGAT181         | 80.7        | 25994.16807 | 322.1086502 | 25994.16807 | 322.1086502 |
| LPLIPAL2ATG12<br>0 | 38.978<br>3 | 15263.39692 | 391.5870349 | 15263.39692 | 391.5870349 |
| PLIPA1E140pp       | 66.326      | 9300.046259 | 140.2165696 | 9300.046259 | 140.2165696 |

|              |              |             |             |             |             |
|--------------|--------------|-------------|-------------|-------------|-------------|
|              | 3            |             |             |             |             |
| PLIPA1E160pp | 66.326<br>3  | 9319.15782  | 140.5047141 | 9319.15782  | 140.5047141 |
| PLIPA1E161pp | 66.326<br>3  | 12158.28134 | 183.3101099 | 12158.28134 | 183.3101099 |
| AACPS8       | 89.339<br>5  | 19300.13799 | 216.0314082 | 19300.13799 | 216.0314082 |
| AACPS9       | 89.339<br>5  | 9300.081582 | 104.098205  | 9300.081582 | 104.098205  |
| HXCT         | 92.971<br>7  | 30493.60812 | 327.9880665 | 30493.60812 | 327.9880665 |
| 2AGPEAT160   | 80.7         | 83842.72261 | 1038.943279 | 83842.72261 | 1038.943279 |
| DURADx       | 178.79<br>66 | 38271.10824 | 214.0482998 | 38271.10824 | 214.0482998 |
| ECOA7_num1   | 77.072<br>2  | 37020.63211 | 480.3370361 | 37020.63211 | 480.3370361 |
| ECOA7_num2   | 159.18<br>78 | 37020.63211 | 232.5594808 | 37020.63211 | 232.5594808 |
| G1PPpp_num1  | 91.365<br>8  | 34600.56248 | 378.7036558 | 34600.56248 | 378.7036558 |
| G1PPpp_num2  | 98.877<br>2  | 34600.56248 | 349.9346915 | 34600.56248 | 349.9346915 |
| GALCTND      | 42.522<br>9  | 20418.46137 | 480.1756552 | 20418.46137 | 480.1756552 |
| GCALDD       | 209.09<br>12 | 72          | 0.344347347 | 72          | 0.344347347 |
| HISTP        | 80.555<br>9  | 13680       | 169.8199635 | 13680       | 169.8199635 |
| LDH_D        | 146.13<br>92 | 41919.84126 | 286.8487118 | 41919.84126 | 286.8487118 |
| AMALT4       | 78.503<br>5  | 32028.92891 | 407.9936425 | 32028.92891 | 407.9936425 |
| NTD11_num1   | 26.900<br>4  | 9325.752358 | 346.6770887 | 9325.752358 | 346.6770887 |
| NTD11_num2   | 25.398<br>8  | 9325.752358 | 367.1729514 | 9325.752358 | 367.1729514 |
| ORNDC_num1   | 158.83<br>24 | 35745.33522 | 225.0506523 | 35745.33522 | 225.0506523 |
| ORNDC_num2   | 164.83<br>16 | 35745.33522 | 216.8597236 | 35745.33522 | 216.8597236 |
| UPP3MT       | 99.902<br>8  | 9455.38735  | 94.64586928 | 9455.38735  | 94.64586928 |
| KAS15        | 67.030       | 22049.2422  | 328.9448965 | 22049.2422  | 328.9448965 |

|                        |              |             |             |             |             |
|------------------------|--------------|-------------|-------------|-------------|-------------|
|                        | 2            |             |             |             |             |
| FACOAL181t2pp<br>_num1 | 124.66<br>4  | 20613.48472 | 165.3523449 | 20613.48472 | 165.3523449 |
| FACOAL181t2pp<br>_num2 | 60.773<br>1  | 20613.48472 | 339.1876459 | 20613.48472 | 339.1876459 |
| T2DECAI                | 37.938<br>1  | 9300.050359 | 245.1374834 | 9300.050359 | 245.1374834 |
| 3OAS161                | 85.226<br>6  | 9300.049776 | 109.1214454 | 9300.049776 | 109.1214454 |
| EAR141y                | 111.45<br>58 | 9385.00781  | 84.2038531  | 9385.00781  | 84.2038531  |
| EAR161x                | 111.45<br>58 | 9300.026639 | 83.44138788 | 9300.026639 | 83.44138788 |
| DASYN160               | 31.453<br>8  | 237600      | 7553.936249 | 237600      | 7553.936249 |
| DASYN161               | 31.453<br>8  | 280800      | 8927.379204 | 280800      | 8927.379204 |
| DASYN181               | 31.453<br>8  | 9600.275596 | 305.2183073 | 9600.275596 | 305.2183073 |
| CDAPPA161              | 28.450<br>8  | 10309.94605 | 362.3780721 | 10309.94605 | 362.3780721 |
| PGSA180                | 20.700<br>6  | 21211.67154 | 1024.688731 | 21211.67154 | 1024.688731 |
| PSSA140                | 52.801<br>8  | 18624.88315 | 352.7319742 | 18624.88315 | 352.7319742 |
| 2AGPGAT141             | 80.7         | 9645.640135 | 119.5246609 | 9645.640135 | 119.5246609 |
| FACOAE180              | 127.86<br>53 | 44832.33864 | 350.6216201 | 44832.33864 | 350.6216201 |
| FACOAE100              | 127.86<br>53 | 148841.6558 | 1164.050417 | 148841.6558 | 1164.050417 |
| FACOAE80               | 127.86<br>53 | 9300.085783 | 72.73346078 | 9300.085783 | 72.73346078 |
| FACOAE60               | 127.86<br>53 | 10237.32554 | 80.06335993 | 10237.32554 | 80.06335993 |
| PLIPA1E120pp           | 66.326<br>3  | 9300.055576 | 140.21671   | 9300.055576 | 140.21671   |
| 3OAS141                | 85.226<br>6  | 9300.05716  | 109.121532  | 9300.05716  | 109.121532  |
| 3OAR121                | 102.24<br>12 | 9300.02693  | 90.96163709 | 9300.02693  | 90.96163709 |
| CFAS160G               | 87.818       | 114927.3368 | 1308.699092 | 114927.3368 | 1308.699092 |
| FACOAE141              | 127.86<br>53 | 22065.15168 | 172.5655958 | 22065.15168 | 172.5655958 |

|                     |              |             |             |             |             |
|---------------------|--------------|-------------|-------------|-------------|-------------|
| FACOA E161          | 127.86<br>53 | 154800      | 1210.649019 | 154800      | 1210.649019 |
| ALAALAD             | 21.213       | 21385.38081 | 1008.126187 | 21385.38081 | 1008.126187 |
| 2AGPEAT180          | 80.7         | 22628.36988 | 280.4011138 | 22628.36988 | 280.4011138 |
| 2AGPEAT181          | 80.7         | 21320.30109 | 264.1920829 | 21320.30109 | 264.1920829 |
| 2AGPGAT140          | 80.7         | 26004.84427 | 322.2409451 | 26004.84427 | 322.2409451 |
| PLIPA1E181pp        | 66.326<br>3  | 9300.044405 | 140.2165416 | 9300.044405 | 140.2165416 |
| PLIPA1G180pp        | 66.326<br>3  | 10731.71028 | 161.8017329 | 10731.71028 | 161.8017329 |
| PLIPA1G181pp        | 66.326<br>3  | 9331.151328 | 140.6855399 | 9331.151328 | 140.6855399 |
| 2AGPGAT161          | 80.7         | 9645.635293 | 119.5246009 | 9645.635293 | 119.5246009 |
| AMPTASEPG_nu<br>m1  | 329.27<br>89 | 29612.1696  | 89.93035873 | 29612.1696  | 89.93035873 |
| AMPTASEPG_nu<br>m2  | 277.08<br>1  | 29612.1696  | 106.871888  | 29612.1696  | 106.871888  |
| AMPTASEPG_nu<br>m3  | 98.918<br>9  | 29612.1696  | 299.3580559 | 29612.1696  | 299.3580559 |
| AMPTASEPG_nu<br>m4  | 105.83<br>08 | 29612.1696  | 279.8067254 | 29612.1696  | 279.8067254 |
| 2AGPEAT140          | 80.7         | 33704.87601 | 417.6564561 | 33704.87601 | 417.6564561 |
| 2AGPEAT120          | 80.7         | 17213.08318 | 213.2971894 | 17213.08318 | 213.2971894 |
| 2AGPEAT161          | 80.7         | 16922.37939 | 209.6949119 | 16922.37939 | 209.6949119 |
| 2AGPEAT141          | 80.7         | 18684.28389 | 231.5276814 | 18684.28389 | 231.5276814 |
| 2AGPGAT160          | 80.7         | 9649.160262 | 119.5682808 | 9649.160262 | 119.5682808 |
| LPLIPAL2ATG14<br>0  | 38.978<br>3  | 14782.19516 | 379.2416591 | 14782.19516 | 379.2416591 |
| LPLIPAL2ATG14<br>1  | 38.978<br>3  | 9726.546006 | 249.5374607 | 9726.546006 | 249.5374607 |
| LPLIPAL2ATG16<br>0  | 38.978<br>3  | 41172.89897 | 1056.303096 | 41172.89897 | 1056.303096 |
| LPLIPAL2ATG18<br>0  | 38.978<br>3  | 14302.36908 | 366.9315767 | 14302.36908 | 366.9315767 |
| LPLIPAL2ATG16<br>1  | 38.978<br>3  | 28569.38076 | 732.9560489 | 28569.38076 | 732.9560489 |
| LPLIPAL2ATG18<br>1  | 38.978<br>3  | 19600.74689 | 502.8630518 | 19600.74689 | 502.8630518 |
| CLPNS180pp_nu<br>m1 | 54.822<br>3  | 18171.28853 | 331.4579748 | 18171.28853 | 331.4579748 |
| CLPNS180pp_nu<br>m2 | 47.633<br>5  | 18171.28853 | 381.4812795 | 18171.28853 | 381.4812795 |
| CLPNS181pp_nu       | 54.822       | 21182.30828 | 386.3812405 | 21182.30828 | 386.3812405 |

|                        |             |             |             |             |             |
|------------------------|-------------|-------------|-------------|-------------|-------------|
| m1                     | 3           |             |             |             |             |
| CLPNS181pp_nu<br>m2    | 47.633<br>5 | 21182.30828 | 444.6935094 | 21182.30828 | 444.6935094 |
| PLIPA1G120pp           | 66.326<br>3 | 9300.04673  | 140.2165767 | 9300.04673  | 140.2165767 |
| CLPNS120pp_nu<br>m1    | 47.633<br>5 | 27301.68336 | 573.1613961 | 27301.68336 | 573.1613961 |
| CLPNS120pp_nu<br>m2    | 54.822<br>3 | 27301.68336 | 498.0032462 | 27301.68336 | 498.0032462 |
| ALPATE160pp            | 82.036<br>3 | 16171.43159 | 197.1253164 | 16171.43159 | 197.1253164 |
| ALPATG160pp            | 82.036<br>3 | 27918.59867 | 340.3200616 | 27918.59867 | 340.3200616 |
| 2AGPGAT120             | 80.7        | 17444.69856 | 216.1672684 | 17444.69856 | 216.1672684 |
| LPLIPAL2ATE120         | 38.978<br>3 | 15214.42477 | 390.3306395 | 15214.42477 | 390.3306395 |
| LPLIPAL2ATE140         | 38.978<br>3 | 9795.36019  | 251.3029093 | 9795.36019  | 251.3029093 |
| LPLIPAL2ATE160         | 38.978<br>3 | 27150.84664 | 696.5631298 | 27150.84664 | 696.5631298 |
| LPLIPAL2ATE180         | 38.978<br>3 | 9726.60245  | 249.5389088 | 9726.60245  | 249.5389088 |
| LPLIPAL2ATE141         | 38.978<br>3 | 24162.76916 | 619.903104  | 24162.76916 | 619.903104  |
| LPLIPAL2ATE161         | 38.978<br>3 | 16457.64902 | 422.2259314 | 16457.64902 | 422.2259314 |
| LPLIPAL2ATE181         | 38.978<br>3 | 9769.098535 | 250.6291587 | 9769.098535 | 250.6291587 |
| FACOAL141t2pp<br>_num1 | 60.773<br>1 | 18524.51186 | 304.8143317 | 18524.51186 | 304.8143317 |
| FACOAL141t2pp<br>_num2 | 124.66<br>4 | 18524.51186 | 148.5955196 | 18524.51186 | 148.5955196 |
| FACOAL161t2pp<br>_num1 | 124.66<br>4 | 21999.51044 | 176.470436  | 21999.51044 | 176.470436  |
| FACOAL161t2pp<br>_num2 | 60.773<br>1 | 21999.51044 | 361.9942119 | 21999.51044 | 361.9942119 |
| PGPP140pp_num<br>1     | 19.418<br>1 | 9509.043636 | 489.7000034 | 9509.043636 | 489.7000034 |
| PGPP140pp_num<br>2     | 29.021<br>3 | 9509.043636 | 327.6573977 | 9509.043636 | 327.6573977 |
| PGPP141pp_num<br>1     | 19.418<br>1 | 17501.08267 | 901.2767815 | 17501.08267 | 901.2767815 |
| PGPP141pp_num          | 29.021      | 17501.08267 | 603.0426849 | 17501.08267 | 603.0426849 |

|                     |             |             |             |             |             |
|---------------------|-------------|-------------|-------------|-------------|-------------|
| 2                   | 3           |             |             |             |             |
| PGPP160pp_num<br>1  | 19.418<br>1 | 9538.650497 | 491.2247077 | 9538.650497 | 491.2247077 |
| PGPP160pp_num<br>2  | 29.021<br>3 | 9538.650497 | 328.6775746 | 9538.650497 | 328.6775746 |
| PGPP180pp_num<br>1  | 19.418<br>1 | 9522.983344 | 490.4178753 | 9522.983344 | 490.4178753 |
| PGPP180pp_num<br>2  | 29.021<br>3 | 9522.983344 | 328.1377245 | 9522.983344 | 328.1377245 |
| PLIPA1E180pp        | 66.326<br>3 | 11091.56683 | 167.2272813 | 11091.56683 | 167.2272813 |
| PLIPA1G140pp        | 66.326<br>3 | 9331.088461 | 140.6845921 | 9331.088461 | 140.6845921 |
| PLIPA1G161pp        | 66.326<br>3 | 9331.310401 | 140.6879383 | 9331.310401 | 140.6879383 |
| CLPNS160pp_nu<br>m1 | 47.633<br>5 | 33484.59677 | 702.9631828 | 33484.59677 | 702.9631828 |
| CLPNS160pp_nu<br>m2 | 54.822<br>3 | 33484.59677 | 610.7842387 | 33484.59677 | 610.7842387 |
| CLPNS161pp_nu<br>m1 | 54.822<br>3 | 23978.23534 | 437.3810538 | 23978.23534 | 437.3810538 |
| CLPNS161pp_nu<br>m2 | 47.633<br>5 | 23978.23534 | 503.3901633 | 23978.23534 | 503.3901633 |
| PAPA120pp           | 29.021<br>3 | 15536.05477 | 535.3328339 | 15536.05477 | 535.3328339 |
| PAPA140pp           | 29.021<br>3 | 9492.458216 | 327.0859064 | 9492.458216 | 327.0859064 |
| PAPA141pp           | 29.021<br>3 | 17942.63231 | 618.2573595 | 17942.63231 | 618.2573595 |
| PAPA160pp           | 29.021<br>3 | 9448.303558 | 325.5644495 | 9448.303558 | 325.5644495 |
| PAPA161pp           | 29.021<br>3 | 14822.92706 | 510.7602711 | 14822.92706 | 510.7602711 |
| PAPA180pp           | 29.021<br>3 | 16282.17018 | 561.0420684 | 16282.17018 | 561.0420684 |
| HPYRI               | 58.754<br>9 | 50196.10612 | 854.3305514 | 50196.10612 | 854.3305514 |
| TPRDCOAS            | 31.644<br>4 | 23356.11375 | 738.0804738 | 23356.11375 | 738.0804738 |
| FLVRx               | 26.242      | 10178.43535 | 387.8681256 | 10178.43535 | 387.8681256 |
| GGPTRCO             | 47.169<br>5 | 59111.19011 | 1253.165501 | 59111.19011 | 1253.165501 |
| HYD1pp_num1         | 181.74      | 5271939.547 | 29006.83224 | 5271939.547 | 29006.83224 |

|                   |              |             |             |             |             |
|-------------------|--------------|-------------|-------------|-------------|-------------|
|                   | 82           |             |             |             |             |
| HYD1pp_num2       | 482.93<br>35 | 5271939.547 | 10916.49171 | 5271939.547 | 10916.49171 |
| HYD1pp_num3       | 232.26<br>86 | 5271939.547 | 22697.59902 | 5271939.547 | 22697.59902 |
| ECAP3pp           | 135.96<br>6  | 54306.83617 | 399.4148256 | 54306.83617 | 399.4148256 |
| FMNRx_num1        | 42.506<br>7  | 23127.606   | 544.09319   | 23127.606   | 544.09319   |
| FMNRx_num2        | 26.242       | 23127.606   | 881.32025   | 23127.606   | 881.32025   |
| DHBS              | 118.22<br>43 | 20871.0962  | 176.5381246 | 20871.0962  | 176.5381246 |
| MDDCP1pp_num<br>1 | 41.849       | 54493.1509  | 1302.137468 | 54493.1509  | 1302.137468 |
| MDDCP1pp_num<br>2 | 87.217<br>8  | 54493.1509  | 624.793917  | 54493.1509  | 624.793917  |
| MDDCP1pp_num<br>3 | 88.887<br>9  | 54493.1509  | 613.0547678 | 54493.1509  | 613.0547678 |
| MDDCP1pp_num<br>4 | 51.798<br>3  | 54493.1509  | 1052.025856 | 54493.1509  | 1052.025856 |
| MDDCP1pp_num<br>5 | 43.346<br>1  | 54493.1509  | 1257.163872 | 54493.1509  | 1257.163872 |
| MDDCP1pp_num<br>6 | 47.752<br>4  | 54493.1509  | 1141.160463 | 54493.1509  | 1141.160463 |
| GUI2              | 53.987<br>2  | 34845.04678 | 645.4316353 | 34845.04678 | 645.4316353 |
| OMBZLM            | 28.073<br>2  | 37665.374   | 1341.684382 | 37665.374   | 1341.684382 |
| GLYCK             | 38.734<br>5  | 29775.87608 | 768.7171922 | 29775.87608 | 768.7171922 |
| MLTG5             | 69.041       | 51313.46702 | 743.2318046 | 51313.46702 | 743.2318046 |
| GPDDA3            | 27.409<br>6  | 16136.67087 | 588.7233259 | 16136.67087 | 588.7233259 |
| 2DOXG6PP_num<br>1 | 23.007<br>5  | 9865.296    | 428.7860915 | 9865.296    | 428.7860915 |
| 2DOXG6PP_num<br>2 | 29.707<br>7  | 9865.296    | 332.078754  | 9865.296    | 332.078754  |
| 2DOXG6PP_num<br>3 | 24.330<br>2  | 9865.296    | 405.4753352 | 9865.296    | 405.4753352 |
| 2DOXG6PP_num<br>4 | 30.370<br>9  | 9865.296    | 324.8272524 | 9865.296    | 324.8272524 |
| AGMH              | 37.594<br>7  | 17554.43253 | 466.939024  | 17554.43253 | 466.939024  |

|                   |              |             |             |             |             |
|-------------------|--------------|-------------|-------------|-------------|-------------|
| MPTG_num1         | 186.32<br>15 | 18797.02545 | 100.8848976 | 18797.02545 | 100.8848976 |
| MPTG_num2         | 128.59<br>62 | 18797.02545 | 146.1709246 | 18797.02545 | 146.1709246 |
| MPTG_num3         | 194.89<br>07 | 18797.02545 | 96.44906324 | 18797.02545 | 96.44906324 |
| MPTG_num4         | 195.54<br>71 | 18797.02545 | 96.12530919 | 18797.02545 | 96.12530919 |
| MPTG2_num1        | 194.89<br>07 | 11151.79658 | 57.2207734  | 11151.79658 | 57.2207734  |
| MPTG2_num2        | 195.54<br>71 | 11151.79658 | 57.02869837 | 11151.79658 | 57.02869837 |
| MPTG2_num3        | 128.59<br>62 | 11151.79658 | 86.71948769 | 11151.79658 | 86.71948769 |
| MPTG2_num4        | 186.32<br>15 | 11151.79658 | 59.85244098 | 11151.79658 | 59.85244098 |
| MCTP1App_num<br>1 | 228.37<br>02 | 42697.94069 | 186.9680925 | 42697.94069 | 186.9680925 |
| MCTP1App_num<br>2 | 229.02<br>66 | 42697.94069 | 186.432234  | 42697.94069 | 186.432234  |
| MCTP2App_num<br>1 | 228.37<br>02 | 125796.3953 | 550.8441789 | 125796.3953 | 550.8441789 |
| MCTP2App_num<br>2 | 229.02<br>66 | 125796.3953 | 549.265436  | 125796.3953 | 549.265436  |
| MCTP1Bpp_num<br>1 | 36.082<br>4  | 374951.4102 | 10391.53189 | 374951.4102 | 10391.53189 |
| MCTP1Bpp_num<br>2 | 67.812<br>5  | 374951.4102 | 5529.237385 | 374951.4102 | 5529.237385 |
| SFGTHi_num1       | 125.03<br>71 | 65737.54739 | 525.7443382 | 65737.54739 | 525.7443382 |
| SFGTHi_num2       | 31.424<br>5  | 65737.54739 | 2091.920234 | 65737.54739 | 2091.920234 |
| DSBCGT            | 51.243<br>3  | 35098.21691 | 684.9327993 | 35098.21691 | 684.9327993 |
| DSBGGT            | 54.99        | 176926.5936 | 3217.432143 | 176926.5936 | 3217.432143 |
| DHNAOT4           | 33.594       | 28638.76395 | 852.4963965 | 28638.76395 | 852.4963965 |
| AMPMS2            | 70.850<br>4  | 25.2        | 0.355679008 | 25.2        | 0.355679008 |
| THIORDXi_num1     | 20.469<br>6  | 21554.20653 | 1052.986211 | 21554.20653 | 1052.986211 |
| THIORDXi_num2     | 29.440<br>6  | 21554.20653 | 732.1252466 | 21554.20653 | 732.1252466 |
| THIORDXi_num3     | 33.188       | 21554.20653 | 649.4441341 | 21554.20653 | 649.4441341 |

|              |              |             |             |             |             |
|--------------|--------------|-------------|-------------|-------------|-------------|
|              | 7            |             |             |             |             |
| PPPGO3       | 84.905<br>2  | 432         | 5.088027588 | 432         | 5.088027588 |
| PDX5POi      | 51.090<br>3  | 108         | 2.113904205 | 108         | 2.113904205 |
| PLIPA1A181pp | 66.326<br>3  | 9331.086136 | 140.684557  | 9331.086136 | 140.684557  |
| LPLIPAL2A141 | 38.978<br>3  | 9300.07818  | 238.5963005 | 9300.07818  | 238.5963005 |
| CYTBO3_4pp   | 143.93<br>13 | 2052552.006 | 14260.63689 | 2052552.006 | 14260.63689 |
| EAR141x      | 111.45<br>58 | 14822.30279 | 132.9881692 | 14822.30279 | 132.9881692 |
| EAR181x      | 111.45<br>58 | 24255.17127 | 217.6214362 | 24255.17127 | 217.6214362 |
| EAR181y      | 111.45<br>58 | 16968.83979 | 152.2472567 | 16968.83979 | 152.2472567 |
| G3PAT141     | 100.02<br>1  | 9708.960668 | 97.06922215 | 9708.960668 | 97.06922215 |
| G3PAT181     | 100.02<br>1  | 18222.06537 | 182.1823954 | 18222.06537 | 182.1823954 |
| DASYN140     | 31.453<br>8  | 24327.98376 | 773.4513402 | 24327.98376 | 773.4513402 |
| DASYN180     | 31.453<br>8  | 17275.5872  | 549.2368871 | 17275.5872  | 549.2368871 |
| DASYN141     | 31.453<br>8  | 23858.22041 | 758.5163132 | 23858.22041 | 758.5163132 |
| CDAPPA160    | 28.450<br>8  | 33511.40562 | 1177.872173 | 33511.40562 | 1177.872173 |
| CDAPPA141    | 28.450<br>8  | 30059.94402 | 1056.558832 | 30059.94402 | 1056.558832 |
| PGSA141      | 20.700<br>6  | 18750.23108 | 905.7820101 | 18750.23108 | 905.7820101 |
| 5DOAN        | 48.707<br>9  | 36          | 0.739099817 | 36          | 0.739099817 |
| FACOA120     | 127.86<br>53 | 79200       | 619.4018236 | 79200       | 619.4018236 |
| 3OAR120      | 102.24<br>12 | 9300.029854 | 90.96166568 | 9300.029854 | 90.96166568 |
| 3HAD80_num1  | 37.938<br>1  | 9300.030919 | 245.136971  | 9300.030919 | 245.136971  |
| 3HAD80_num2  | 102.19<br>77 | 9300.030919 | 91.00039354 | 9300.030919 | 91.00039354 |

|                |              |             |             |             |             |
|----------------|--------------|-------------|-------------|-------------|-------------|
| 3HAD120_num1   | 102.19<br>77 | 9300.045229 | 91.00053357 | 9300.045229 | 91.00053357 |
| 3HAD120_num2   | 37.938<br>1  | 9300.045229 | 245.1373482 | 9300.045229 | 245.1373482 |
| EAR180x        | 111.45<br>58 | 12882.05534 | 115.5799459 | 12882.05534 | 115.5799459 |
| EAR180y        | 111.45<br>58 | 9300.032341 | 83.44143904 | 9300.032341 | 83.44143904 |
| AGPAT120       | 27.453<br>2  | 9300.241951 | 338.7671365 | 9300.241951 | 338.7671365 |
| PGPP120_num1   | 19.418<br>1  | 9300.055518 | 478.9374613 | 9300.055518 | 478.9374613 |
| PGPP120_num2   | 29.021<br>3  | 9300.055518 | 320.4562    | 9300.055518 | 320.4562    |
| DAGK120        | 39.734       | 18231.9674  | 458.8505411 | 18231.9674  | 458.8505411 |
| PSSA180        | 52.801<br>8  | 22589.43123 | 427.8155524 | 22589.43123 | 427.8155524 |
| PSSA161        | 52.801<br>8  | 64800       | 1227.23089  | 64800       | 1227.23089  |
| PSSA141        | 52.801<br>8  | 10725.55609 | 203.1286072 | 10725.55609 | 203.1286072 |
| PSD160         | 35.934<br>4  | 24120       | 671.2231177 | 24120       | 671.2231177 |
| PSD161         | 35.934<br>4  | 28440       | 791.4421835 | 28440       | 791.4421835 |
| PSD180         | 35.934<br>4  | 11039.19848 | 307.2041965 | 11039.19848 | 307.2041965 |
| COLIPAabcpp    | 128.92<br>14 | 9847.991952 | 76.38756601 | 9847.991952 | 76.38756601 |
| PLIPA2A140pp   | 66.326<br>3  | 9319.145036 | 140.5045214 | 9319.145036 | 140.5045214 |
| PLIPA2A141pp   | 66.326<br>3  | 9319.146347 | 140.5045411 | 9319.146347 | 140.5045411 |
| PLIPA2A180pp   | 66.326<br>3  | 9300.042994 | 140.2165203 | 9300.042994 | 140.2165203 |
| CU1Opp         | 56.556<br>2  | 40900.17532 | 723.1775706 | 40900.17532 | 723.1775706 |
| SUCDi          | 355.07<br>52 | 383163.8026 | 1079.106067 | 383163.8026 | 1079.106067 |
| LPLIPAL1E141pp | 94.488<br>6  | 9609.131398 | 101.6961982 | 9609.131398 | 101.6961982 |
| LALDO2x        | 309.69<br>76 | 30808.04378 | 99.47782541 | 30808.04378 | 99.47782541 |

|                |              |             |             |             |             |
|----------------|--------------|-------------|-------------|-------------|-------------|
| LPLIPAL1E160pp | 94.488<br>6  | 15013.90298 | 158.8964487 | 15013.90298 | 158.8964487 |
| LPLIPAL1E180pp | 94.488<br>6  | 9300.057685 | 98.42518235 | 9300.057685 | 98.42518235 |
| LPLIPAL1E181pp | 94.488<br>6  | 9300.051662 | 98.42511861 | 9300.051662 | 98.42511861 |
| LPLIPAL1G160pp | 94.488<br>6  | 9751.655563 | 103.2045724 | 9751.655563 | 103.2045724 |
| LPLIPAL1G161pp | 94.488<br>6  | 15394.04218 | 162.9195711 | 15394.04218 | 162.9195711 |
| LPLIPAL1G120pp | 94.488<br>6  | 9607.452793 | 101.6784331 | 9607.452793 | 101.6784331 |
| PLIPA2E140pp   | 66.326<br>3  | 9652.145285 | 145.525158  | 9652.145285 | 145.525158  |
| PLIPA2E160pp   | 66.326<br>3  | 9379.556975 | 141.4153507 | 9379.556975 | 141.4153507 |
| PLIPA2A161pp   | 66.326<br>3  | 9331.848079 | 140.6960448 | 9331.848079 | 140.6960448 |
| PLIPA2A181pp   | 66.326<br>3  | 12083.64247 | 182.1847815 | 12083.64247 | 182.1847815 |
| ALR4x          | 309.69<br>76 | 45141.94591 | 145.7613682 | 45141.94591 | 145.7613682 |
| LPLIPAL1G141pp | 94.488<br>6  | 9300.056692 | 98.42517184 | 9300.056692 | 98.42517184 |
| LPLIPAL1G180pp | 94.488<br>6  | 14240.04696 | 150.7065081 | 14240.04696 | 150.7065081 |
| LPLIPAL1G181pp | 94.488<br>6  | 9300.05235  | 98.42512589 | 9300.05235  | 98.42512589 |
| ACONTb_num1    | 186.99<br>62 | 102219.9572 | 546.6418955 | 102219.9572 | 546.6418955 |
| ACONTb_num2    | 195.35<br>44 | 102219.9572 | 523.2539283 | 102219.9572 | 523.2539283 |
| GLCP2_num1     | 181.04<br>48 | 256439.2924 | 1416.441082 | 256439.2924 | 1416.441082 |
| GLCP2_num2     | 186.34<br>51 | 256439.2924 | 1376.152592 | 256439.2924 | 1376.152592 |
| PLIPA2E141pp   | 66.326<br>3  | 11806.14603 | 178.0009744 | 11806.14603 | 178.0009744 |
| PLIPA2E181pp   | 66.326<br>3  | 9300.059374 | 140.2167673 | 9300.059374 | 140.2167673 |
| PLIPA2G140pp   | 66.326<br>3  | 9300.054092 | 140.2166877 | 9300.054092 | 140.2166877 |
| 3HAD161_num1   | 37.938<br>1  | 9300.028072 | 245.1368959 | 9300.028072 | 245.1368959 |

|                   |              |             |             |             |             |
|-------------------|--------------|-------------|-------------|-------------|-------------|
| 3HAD161_num2      | 102.19<br>77 | 9300.028072 | 91.00036568 | 9300.028072 | 91.00036568 |
| PLIPA2G160pp      | 66.326<br>3  | 9331.087626 | 140.6845795 | 9331.087626 | 140.6845795 |
| PLIPA2G181pp      | 66.326<br>3  | 9300.262651 | 140.2198321 | 9300.262651 | 140.2198321 |
| ASNS1             | 125.31<br>8  | 11068.89723 | 88.32647532 | 11068.89723 | 88.32647532 |
| EAR80y            | 111.45<br>58 | 9300.029087 | 83.44140984 | 9300.029087 | 83.44140984 |
| EAR120y           | 111.45<br>58 | 9300.025246 | 83.44137538 | 9300.025246 | 83.44137538 |
| 3OAR181           | 102.24<br>12 | 16993.44901 | 166.2094049 | 16993.44901 | 166.2094049 |
| 3HAD121_num1      | 37.938<br>1  | 9300.039797 | 245.137205  | 9300.039797 | 245.137205  |
| 3HAD121_num2      | 102.19<br>77 | 9300.039797 | 91.00048041 | 9300.039797 | 91.00048041 |
| EAR121y           | 111.45<br>58 | 9300.032309 | 83.44143875 | 9300.032309 | 83.44143875 |
| GTHRDHpp          | 61.768       | 75119.99162 | 1216.163574 | 75119.99162 | 1216.163574 |
| MDDCP2pp_num<br>1 | 47.752<br>4  | 26499.7787  | 554.9412952 | 26499.7787  | 554.9412952 |
| MDDCP2pp_num<br>2 | 87.217<br>8  | 26499.7787  | 303.8345235 | 26499.7787  | 303.8345235 |
| MDDCP2pp_num<br>3 | 88.887<br>9  | 26499.7787  | 298.1258271 | 26499.7787  | 298.1258271 |
| MDDCP2pp_num<br>4 | 51.798<br>3  | 26499.7787  | 511.5955293 | 26499.7787  | 511.5955293 |
| MDDCP2pp_num<br>5 | 43.346<br>1  | 26499.7787  | 611.3532406 | 26499.7787  | 611.3532406 |
| MDDCP2pp_num<br>6 | 41.849       | 26499.7787  | 633.223702  | 26499.7787  | 633.223702  |
| MDDCP3pp_num<br>1 | 47.752<br>4  | 26609.07923 | 557.2301964 | 26609.07923 | 557.2301964 |
| MDDCP3pp_num<br>2 | 87.217<br>8  | 26609.07923 | 305.0877141 | 26609.07923 | 305.0877141 |
| MDDCP3pp_num<br>3 | 88.887<br>9  | 26609.07923 | 299.3554717 | 26609.07923 | 299.3554717 |
| MDDCP3pp_num<br>4 | 51.798<br>3  | 26609.07923 | 513.7056473 | 26609.07923 | 513.7056473 |
| MDDCP3pp_num<br>5 | 43.346<br>1  | 26609.07923 | 613.8748176 | 26609.07923 | 613.8748176 |

|                    |              |             |             |             |             |
|--------------------|--------------|-------------|-------------|-------------|-------------|
| MDDCP3pp_num<br>6  | 41.849       | 26609.07923 | 635.8354855 | 26609.07923 | 635.8354855 |
| EAR140x            | 111.45<br>58 | 18506.45411 | 166.0429884 | 18506.45411 | 166.0429884 |
| EAR40y             | 111.45<br>58 | 15779.792   | 141.5789219 | 15779.792   | 141.5789219 |
| 3OAS181            | 86.091<br>5  | 13204.15682 | 153.3735249 | 13204.15682 | 153.3735249 |
| EAR161y            | 111.45<br>58 | 9387.626342 | 84.22734701 | 9387.626342 | 84.22734701 |
| G3PAT140           | 100.02<br>1  | 21089.53063 | 210.8510276 | 21089.53063 | 210.8510276 |
| G3PAT160           | 100.02<br>1  | 19657.24406 | 196.5311691 | 19657.24406 | 196.5311691 |
| G3PAT161           | 100.02<br>1  | 21670.12086 | 216.6557109 | 21670.12086 | 216.6557109 |
| AGPAT160           | 27.453<br>2  | 489600      | 17833.98657 | 489600      | 17833.98657 |
| CDAPPA140          | 28.450<br>8  | 9300.229927 | 326.8881693 | 9300.229927 | 326.8881693 |
| MLDCP1App_nu<br>m1 | 36.082<br>4  | 12050.76394 | 333.9790019 | 12050.76394 | 333.9790019 |
| MLDCP1App_nu<br>m2 | 34.411<br>1  | 12050.76394 | 350.1999046 | 12050.76394 | 350.1999046 |
| MLDCP1App_nu<br>m3 | 67.812<br>5  | 12050.76394 | 177.707118  | 12050.76394 | 177.707118  |
| MLDCP1App_nu<br>m4 | 34.635<br>9  | 12050.76394 | 347.9269757 | 12050.76394 | 347.9269757 |
| MLDCP1App_nu<br>m5 | 33.325<br>3  | 12050.76394 | 361.6100661 | 12050.76394 | 361.6100661 |
| EAR160y            | 111.45<br>58 | 9300.034724 | 83.44146042 | 9300.034724 | 83.44146042 |
| EAR100y            | 111.45<br>58 | 9300.030649 | 83.44142386 | 9300.030649 | 83.44142386 |
| 3OAR141            | 102.24<br>12 | 9300.034418 | 90.96171033 | 9300.034418 | 90.96171033 |
| 3OAR161            | 102.24<br>12 | 9300.055921 | 90.96192065 | 9300.055921 | 90.96192065 |
| 3HAD141_num1       | 37.938<br>1  | 9300.023712 | 245.136781  | 9300.023712 | 245.136781  |
| 3HAD141_num2       | 102.19<br>77 | 9300.023712 | 91.00032302 | 9300.023712 | 91.00032302 |
| EAR121x            | 111.45<br>58 | 14092.40007 | 126.4393605 | 14092.40007 | 126.4393605 |

|                |              |             |             |             |             |
|----------------|--------------|-------------|-------------|-------------|-------------|
| PSD140         | 35.934<br>4  | 23485.34589 | 653.5616538 | 23485.34589 | 653.5616538 |
| MICITDr        | 186.99<br>62 | 24735.85224 | 132.2799727 | 24735.85224 | 132.2799727 |
| CDAPPA181      | 28.450<br>8  | 32332.59317 | 1136.438806 | 32332.59317 | 1136.438806 |
| PGSA140        | 20.700<br>6  | 9537.624374 | 460.7414459 | 9537.624374 | 460.7414459 |
| LPLIPAL1A141pp | 94.488<br>6  | 10375.35393 | 109.8053515 | 10375.35393 | 109.8053515 |
| LPLIPAL1A180pp | 94.488<br>6  | 9300.046054 | 98.42505925 | 9300.046054 | 98.42505925 |
| LPLIPAL1E140pp | 94.488<br>6  | 9607.460155 | 101.678511  | 9607.460155 | 101.678511  |
| LPLIPAL1E161pp | 94.488<br>6  | 13796.97292 | 146.0173283 | 13796.97292 | 146.0173283 |
| LPLIPAL1G140pp | 94.488<br>6  | 9300.039358 | 98.42498839 | 9300.039358 | 98.42498839 |
| ACONTa_num1    | 186.99<br>62 | 77882.09375 | 416.4902482 | 77882.09375 | 416.4902482 |
| ACONTa_num2    | 195.35<br>44 | 77882.09375 | 398.6707939 | 77882.09375 | 398.6707939 |
| MLDCP2App_num1 | 67.812<br>5  | 61771.37288 | 910.9142545 | 61771.37288 | 910.9142545 |
| MLDCP2App_num2 | 36.082<br>4  | 61771.37288 | 1711.952999 | 61771.37288 | 1711.952999 |
| MLDCP2App_num3 | 34.635<br>9  | 61771.37288 | 1783.449337 | 61771.37288 | 1783.449337 |
| MLDCP2App_num4 | 33.325<br>3  | 61771.37288 | 1853.587901 | 61771.37288 | 1853.587901 |
| MLDCP2App_num5 | 34.411<br>1  | 61771.37288 | 1795.100211 | 61771.37288 | 1795.100211 |
| PGPP120pp_num1 | 19.418<br>1  | 39502.05577 | 2034.29047  | 39502.05577 | 2034.29047  |
| PGPP120pp_num2 | 29.021<br>3  | 39502.05577 | 1361.14012  | 39502.05577 | 1361.14012  |
| PGPP181pp_num1 | 19.418<br>1  | 9508.83052  | 489.6890283 | 9508.83052  | 489.6890283 |
| PGPP181pp_num2 | 29.021<br>3  | 9508.83052  | 327.6500543 | 9508.83052  | 327.6500543 |
| PGSA181        | 20.700<br>6  | 9766.998331 | 471.8219922 | 9766.998331 | 471.8219922 |
| PGPP140_num1   | 19.418<br>1  | 9921.214537 | 510.9261224 | 9921.214537 | 510.9261224 |

|                    |             |             |             |             |             |
|--------------------|-------------|-------------|-------------|-------------|-------------|
| PGPP140_num2       | 29.021<br>3 | 9921.214537 | 341.859756  | 9921.214537 | 341.859756  |
| PGPP141_num1       | 19.418<br>1 | 9300.062779 | 478.9378353 | 9300.062779 | 478.9378353 |
| PGPP141_num2       | 29.021<br>3 | 9300.062779 | 320.4564502 | 9300.062779 | 320.4564502 |
| MDDCP5pp_num<br>1  | 47.752<br>4 | 152010.8959 | 3183.314261 | 152010.8959 | 3183.314261 |
| MDDCP5pp_num<br>2  | 87.217<br>8 | 152010.8959 | 1742.888446 | 152010.8959 | 1742.888446 |
| MDDCP5pp_num<br>3  | 88.887<br>9 | 152010.8959 | 1710.141605 | 152010.8959 | 1710.141605 |
| MDDCP5pp_num<br>4  | 51.798<br>3 | 152010.8959 | 2934.669592 | 152010.8959 | 2934.669592 |
| MDDCP5pp_num<br>5  | 43.346<br>1 | 152010.8959 | 3506.910562 | 152010.8959 | 3506.910562 |
| MDDCP5pp_num<br>6  | 41.849      | 152010.8959 | 3632.366268 | 152010.8959 | 3632.366268 |
| MLTGY3pp_num<br>1  | 49.417<br>5 | 26411.44996 | 534.4554047 | 26411.44996 | 534.4554047 |
| MLTGY3pp_num<br>2  | 40.112<br>5 | 26411.44996 | 658.4344023 | 26411.44996 | 658.4344023 |
| MLTGY3pp_num<br>3  | 40.255<br>8 | 26411.44996 | 656.09055   | 26411.44996 | 656.09055   |
| MLTGY3pp_num<br>4  | 73.353<br>2 | 26411.44996 | 360.0585927 | 26411.44996 | 360.0585927 |
| MLTGY3pp_num<br>5  | 40.410<br>6 | 26411.44996 | 653.5772783 | 26411.44996 | 653.5772783 |
| MLTGY3pp_num<br>6  | 22.226<br>6 | 26411.44996 | 1188.281157 | 26411.44996 | 1188.281157 |
| MLTGY3pp_num<br>7  | 58.302<br>2 | 26411.44996 | 453.0094913 | 26411.44996 | 453.0094913 |
| MLTGY3pp_num<br>8  | 38.247<br>4 | 26411.44996 | 690.5423626 | 26411.44996 | 690.5423626 |
| G3PAT180           | 100.02<br>1 | 9300.061724 | 92.98109121 | 9300.061724 | 92.98109121 |
| AGPAT140           | 27.453<br>2 | 11008.28694 | 400.9837445 | 11008.28694 | 400.9837445 |
| PGSA160            | 20.700<br>6 | 10557.80693 | 510.0241986 | 10557.80693 | 510.0241986 |
| MLDCP2Bpp_nu<br>m1 | 36.082<br>4 | 71515.31566 | 1981.999968 | 71515.31566 | 1981.999968 |
| MLDCP2Bpp_nu<br>m2 | 33.325<br>3 | 71515.31566 | 2145.97665  | 71515.31566 | 2145.97665  |

|                |          |             |             |             |             |
|----------------|----------|-------------|-------------|-------------|-------------|
| MLDCP2Bpp_num3 | 34.6359  | 71515.31566 | 2064.774285 | 71515.31566 | 2064.774285 |
| MLDCP2Bpp_num4 | 34.4111  | 71515.31566 | 2078.262992 | 71515.31566 | 2078.262992 |
| MLDCP2Bpp_num5 | 67.8125  | 71515.31566 | 1054.603733 | 71515.31566 | 1054.603733 |
| 3OAS140_num1   | 85.2266  | 15220.88429 | 178.5931187 | 15220.88429 | 178.5931187 |
| 3OAS140_num2   | 86.0915  | 15220.88429 | 176.7989208 | 15220.88429 | 176.7989208 |
| 3OAR140        | 102.2412 | 4680        | 45.77411063 | 4680        | 45.77411063 |
| 3OAR160        | 102.2412 | 9300.030959 | 90.96167649 | 9300.030959 | 90.96167649 |
| PGSA161        | 20.7006  | 23465.32539 | 1133.557742 | 23465.32539 | 1133.557742 |
| 3HAD181_num1   | 37.9381  | 16748.6226  | 441.4723615 | 16748.6226  | 441.4723615 |
| 3HAD181_num2   | 102.1977 | 16748.6226  | 163.8845355 | 16748.6226  | 163.8845355 |
| PGPP160_num1   | 19.4181  | 9509.750323 | 489.7363966 | 9509.750323 | 489.7363966 |
| PGPP160_num2   | 29.0213  | 9509.750323 | 327.6817483 | 9509.750323 | 327.6817483 |
| PGPP180_num1   | 19.4181  | 17375.97622 | 894.8340064 | 17375.97622 | 894.8340064 |
| PGPP180_num2   | 29.0213  | 17375.97622 | 598.7318356 | 17375.97622 | 598.7318356 |
| PGPP161_num1   | 19.4181  | 9547.694856 | 491.6904772 | 9547.694856 | 491.6904772 |
| PGPP161_num2   | 29.0213  | 9547.694856 | 328.9892202 | 9547.694856 | 328.9892202 |
| PGPP181_num1   | 29.0213  | 17233.97969 | 593.8389973 | 17233.97969 | 593.8389973 |
| PGPP181_num2   | 19.4181  | 17233.97969 | 887.5214203 | 17233.97969 | 887.5214203 |
| CDAPPA180      | 28.4508  | 63141.67922 | 2219.328779 | 63141.67922 | 2219.328779 |
| NTP12          | 36.4253  | 9852.661984 | 270.4895219 | 9852.661984 | 270.4895219 |
| PSD141         | 35.9344  | 26441.03704 | 735.8140679 | 26441.03704 | 735.8140679 |
| PAPA181pp      | 29.0213  | 9300.075757 | 320.4568974 | 9300.075757 | 320.4568974 |

|                     |             |             |             |             |             |
|---------------------|-------------|-------------|-------------|-------------|-------------|
| MDDCP4pp_num<br>1   | 47.752<br>4 | 11770.52921 | 246.4908405 | 11770.52921 | 246.4908405 |
| MDDCP4pp_num<br>2   | 87.217<br>8 | 11770.52921 | 134.9555849 | 11770.52921 | 134.9555849 |
| MDDCP4pp_num<br>3   | 88.887<br>9 | 11770.52921 | 132.4199268 | 11770.52921 | 132.4199268 |
| MDDCP4pp_num<br>4   | 51.798<br>3 | 11770.52921 | 227.2377513 | 11770.52921 | 227.2377513 |
| MDDCP4pp_num<br>5   | 43.346<br>1 | 11770.52921 | 271.5475951 | 11770.52921 | 271.5475951 |
| MDDCP4pp_num<br>6   | 41.849      | 11770.52921 | 281.261899  | 11770.52921 | 281.261899  |
| CLPNS140pp_nu<br>m1 | 54.822<br>3 | 10794.75856 | 196.904518  | 10794.75856 | 196.904518  |
| CLPNS140pp_nu<br>m2 | 47.633<br>5 | 10794.75856 | 226.6211502 | 10794.75856 | 226.6211502 |
| CLPNS141pp_nu<br>m1 | 54.822<br>3 | 32295.07812 | 589.0865235 | 32295.07812 | 589.0865235 |
| CLPNS141pp_nu<br>m2 | 47.633<br>5 | 32295.07812 | 677.9908703 | 32295.07812 | 677.9908703 |
| CFAS160E            | 87.818      | 52560.31961 | 598.5141954 | 52560.31961 | 598.5141954 |
| CFAS180E            | 87.818      | 1612231.501 | 18358.78181 | 1612231.501 | 18358.78181 |
| CFAS180G            | 87.818      | 107777.6323 | 1227.284068 | 107777.6323 | 1227.284068 |
| PAPA160             | 29.021<br>3 | 16190.81334 | 557.8941445 | 16190.81334 | 557.8941445 |
| PAPA180             | 29.021<br>3 | 15173.4659  | 522.8389459 | 15173.4659  | 522.8389459 |
| PAPA181             | 29.021<br>3 | 19467.0968  | 670.786519  | 19467.0968  | 670.786519  |
| PETNT161pp          | 63.804<br>4 | 23599.62422 | 369.8745576 | 23599.62422 | 369.8745576 |
| PSSA160             | 52.801<br>8 | 54000       | 1022.692408 | 54000       | 1022.692408 |
| PSSA181             | 52.801<br>8 | 18305.1176  | 346.6760149 | 18305.1176  | 346.6760149 |
| DAGK140             | 39.734      | 9418.972615 | 237.0507026 | 9418.972615 | 237.0507026 |
| DAGK160             | 39.734      | 9418.996138 | 237.0512945 | 9418.996138 | 237.0512945 |
| DAGK141             | 39.734      | 9300.306841 | 234.0641979 | 9300.306841 | 234.0641979 |
| DAGK161             | 39.734      | 18097.76754 | 455.4730846 | 18097.76754 | 455.4730846 |
| AGPAT181            | 27.453<br>2 | 71164.94731 | 2592.227766 | 71164.94731 | 2592.227766 |
| MDDEP3pp_num<br>1   | 29.916<br>6 | 33111.5862  | 1106.796434 | 33111.5862  | 1106.796434 |

|                   |             |             |             |             |             |
|-------------------|-------------|-------------|-------------|-------------|-------------|
| MDDEP3pp_num<br>2 | 21.039<br>9 | 33111.5862  | 1573.752071 | 33111.5862  | 1573.752071 |
| MDDEP3pp_num<br>3 | 60.273<br>3 | 33111.5862  | 549.3574469 | 33111.5862  | 549.3574469 |
| MDDEP3pp_num<br>4 | 51.798<br>3 | 33111.5862  | 639.2407898 | 33111.5862  | 639.2407898 |
| MDDEP3pp_num<br>5 | 33.887<br>4 | 33111.5862  | 977.106128  | 33111.5862  | 977.106128  |
| MDDEP3pp_num<br>6 | 41.849      | 33111.5862  | 791.2157089 | 33111.5862  | 791.2157089 |
| MDDEP3pp_num<br>7 | 49.057<br>8 | 33111.5862  | 674.9504911 | 33111.5862  | 674.9504911 |
| MDDEP4pp_num<br>1 | 29.916<br>6 | 26327.99993 | 880.0465271 | 26327.99993 | 880.0465271 |
| MDDEP4pp_num<br>2 | 41.849      | 26327.99993 | 629.1189738 | 26327.99993 | 629.1189738 |
| MDDEP4pp_num<br>3 | 60.273<br>3 | 26327.99993 | 436.8103279 | 26327.99993 | 436.8103279 |
| MDDEP4pp_num<br>4 | 51.798<br>3 | 26327.99993 | 508.279228  | 26327.99993 | 508.279228  |
| MDDEP4pp_num<br>5 | 33.887<br>4 | 26327.99993 | 776.9259351 | 26327.99993 | 776.9259351 |
| MDDEP4pp_num<br>6 | 21.039<br>9 | 26327.99993 | 1251.336743 | 26327.99993 | 1251.336743 |
| MDDEP4pp_num<br>7 | 49.057<br>8 | 26327.99993 | 536.6730659 | 26327.99993 | 536.6730659 |
| MLTGY1pp_num<br>1 | 49.417<br>5 | 31677.55986 | 641.0190693 | 31677.55986 | 641.0190693 |
| MLTGY1pp_num<br>2 | 22.226<br>6 | 31677.55986 | 1425.209427 | 31677.55986 | 1425.209427 |
| MLTGY1pp_num<br>3 | 40.410<br>6 | 31677.55986 | 783.8923416 | 31677.55986 | 783.8923416 |
| MLTGY1pp_num<br>4 | 40.112<br>5 | 31677.55986 | 789.7179148 | 31677.55986 | 789.7179148 |
| MLTGY1pp_num<br>5 | 73.353<br>2 | 31677.55986 | 431.8497333 | 31677.55986 | 431.8497333 |
| MLTGY1pp_num<br>6 | 40.255<br>8 | 31677.55986 | 786.9067279 | 31677.55986 | 786.9067279 |
| MLTGY1pp_num<br>7 | 58.302<br>2 | 31677.55986 | 543.3338683 | 31677.55986 | 543.3338683 |
| MLTGY1pp_num<br>8 | 38.247<br>4 | 31677.55986 | 828.2277974 | 31677.55986 | 828.2277974 |
| 3HAD40_num1<br>1  | 37.938<br>1 | 13622.60957 | 359.0746392 | 13622.60957 | 359.0746392 |

|                |              |             |             |             |             |
|----------------|--------------|-------------|-------------|-------------|-------------|
| 3HAD40_num2    | 102.19<br>77 | 13622.60957 | 133.2966355 | 13622.60957 | 133.2966355 |
| PLIPA1E141pp   | 66.326<br>3  | 9300.040567 | 140.2164838 | 9300.040567 | 140.2164838 |
| 3OAS60_num1    | 86.091<br>5  | 14210.82631 | 165.0665433 | 14210.82631 | 165.0665433 |
| 3OAS60_num2    | 85.226<br>6  | 14210.82631 | 166.7416782 | 14210.82631 | 166.7416782 |
| 3OAS160_num1   | 85.226<br>6  | 9300.048851 | 109.1214345 | 9300.048851 | 109.1214345 |
| 3OAS160_num2   | 86.091<br>5  | 9300.048851 | 108.0251692 | 9300.048851 | 108.0251692 |
| 3OAR60         | 102.24<br>12 | 14676.62331 | 143.5490126 | 14676.62331 | 143.5490126 |
| 3OAR80         | 102.24<br>12 | 9300.033619 | 90.96170252 | 9300.033619 | 90.96170252 |
| MLDCP3App_num1 | 36.082<br>4  | 11472.2901  | 317.9469798 | 11472.2901  | 317.9469798 |
| MLDCP3App_num2 | 34.411<br>1  | 11472.2901  | 333.3892292 | 11472.2901  | 333.3892292 |
| MLDCP3App_num3 | 67.812<br>5  | 11472.2901  | 169.1766283 | 11472.2901  | 169.1766283 |
| MLDCP3App_num4 | 34.635<br>9  | 11472.2901  | 331.2254078 | 11472.2901  | 331.2254078 |
| MLDCP3App_num5 | 33.325<br>3  | 11472.2901  | 344.2516678 | 11472.2901  | 344.2516678 |
| MLDCP1Bpp_num1 | 36.082<br>4  | 38207.63549 | 1058.899505 | 38207.63549 | 1058.899505 |
| MLDCP1Bpp_num2 | 34.411<br>1  | 38207.63549 | 1110.328803 | 38207.63549 | 1110.328803 |
| MLDCP1Bpp_num3 | 67.812<br>5  | 38207.63549 | 563.4305694 | 38207.63549 | 563.4305694 |
| MLDCP1Bpp_num4 | 34.635<br>9  | 38207.63549 | 1103.122352 | 38207.63549 | 1103.122352 |
| MLDCP1Bpp_num5 | 33.325<br>3  | 38207.63549 | 1146.505372 | 38207.63549 | 1146.505372 |
| PLIPA1G160pp   | 66.326<br>3  | 9331.083133 | 140.6845118 | 9331.083133 | 140.6845118 |
| PLIPA1G141pp   | 66.326<br>3  | 9300.055363 | 140.2167068 | 9300.055363 | 140.2167068 |
| LPLIPAL2E160   | 38.978<br>3  | 22686.53673 | 582.0299173 | 22686.53673 | 582.0299173 |
| LPLIPAL2G140   | 38.978<br>3  | 16311.88717 | 418.4863673 | 16311.88717 | 418.4863673 |

|                    |              |             |             |             |             |
|--------------------|--------------|-------------|-------------|-------------|-------------|
| LPLIPAL2G160       | 38.978<br>3  | 10136.74444 | 260.0612248 | 10136.74444 | 260.0612248 |
| LPLIPAL2G120       | 38.978<br>3  | 9300.050474 | 238.5955897 | 9300.050474 | 238.5955897 |
| PGPP161pp_num<br>1 | 19.418<br>1  | 9508.609454 | 489.6776438 | 9508.609454 | 489.6776438 |
| PGPP161pp_num<br>2 | 29.021<br>3  | 9508.609454 | 327.6424369 | 9508.609454 | 327.6424369 |
| PAPA140            | 29.021<br>3  | 33006.15625 | 1137.307986 | 33006.15625 | 1137.307986 |
| PAPA141            | 29.021<br>3  | 9542.900549 | 328.8240206 | 9542.900549 | 328.8240206 |
| PAPA161            | 29.021<br>3  | 17767.63809 | 612.2275048 | 17767.63809 | 612.2275048 |
| DSBAO1             | 43.246<br>7  | 20873.21805 | 482.6545853 | 20873.21805 | 482.6545853 |
| DSBAO2             | 43.246<br>7  | 11874.51671 | 274.5762499 | 11874.51671 | 274.5762499 |
| DSBDR_num1         | 77.349<br>9  | 37200.94625 | 480.943689  | 37200.94625 | 480.943689  |
| DSBDR_num2         | 73.601<br>7  | 37200.94625 | 505.4359648 | 37200.94625 | 505.4359648 |
| PLIPA2A120pp       | 66.326<br>3  | 9319.130597 | 140.5043037 | 9319.130597 | 140.5043037 |
| PLIPA2A160pp       | 66.326<br>3  | 14809.58551 | 223.2837579 | 14809.58551 | 223.2837579 |
| LPLIPAL2E120       | 38.978<br>3  | 9300.089592 | 238.5965933 | 9300.089592 | 238.5965933 |
| EAR100x            | 111.45<br>58 | 13324.87919 | 119.5530353 | 13324.87919 | 119.5530353 |
| EAR120x            | 111.45<br>58 | 15973.78694 | 143.3194768 | 15973.78694 | 143.3194768 |
| EAR160x            | 111.45<br>58 | 9300.034296 | 83.44145658 | 9300.034296 | 83.44145658 |
| EAR140y            | 111.45<br>58 | 15246.01464 | 136.7897825 | 15246.01464 | 136.7897825 |
| 3OAS121            | 85.226<br>6  | 9300.067402 | 109.1216522 | 9300.067402 | 109.1216522 |
| 3OAS80_num1        | 85.226<br>6  | 9300.057325 | 109.1215339 | 9300.057325 | 109.1215339 |
| 3OAS80_num2        | 86.091<br>5  | 9300.057325 | 108.0252676 | 9300.057325 | 108.0252676 |
| 3OAS100_num1       | 85.226<br>6  | 9300.069292 | 109.1216744 | 9300.069292 | 109.1216744 |

|                   |              |             |             |             |             |
|-------------------|--------------|-------------|-------------|-------------|-------------|
| 3OAS100_num2      | 86.091<br>5  | 9300.069292 | 108.0254066 | 9300.069292 | 108.0254066 |
| 3OAS120_num1      | 86.091<br>5  | 9300.044909 | 108.0251234 | 9300.044909 | 108.0251234 |
| 3OAS120_num2      | 85.226<br>6  | 9300.044909 | 109.1213883 | 9300.044909 | 109.1213883 |
| 3OAR40            | 102.24<br>12 | 11866.89778 | 116.0676692 | 11866.89778 | 116.0676692 |
| 3OAR100           | 102.24<br>12 | 9300.038342 | 90.96174871 | 9300.038342 | 90.96174871 |
| 3HAD60_num1       | 37.938<br>1  | 35394.22481 | 932.9466898 | 35394.22481 | 932.9466898 |
| 3HAD60_num2       | 102.19<br>77 | 35394.22481 | 346.3309332 | 35394.22481 | 346.3309332 |
| 3HAD100_num1      | 37.938<br>1  | 9300.031517 | 245.1369867 | 9300.031517 | 245.1369867 |
| 3HAD100_num2      | 102.19<br>77 | 9300.031517 | 91.00039939 | 9300.031517 | 91.00039939 |
| 3HAD140_num1      | 37.938<br>1  | 9689.000825 | 255.3897223 | 9689.000825 | 255.3897223 |
| 3HAD140_num2      | 102.19<br>77 | 9689.000825 | 94.80644696 | 9689.000825 | 94.80644696 |
| 3HAD160_num1      | 37.938<br>1  | 9300.049708 | 245.1374662 | 9300.049708 | 245.1374662 |
| 3HAD160_num2      | 102.19<br>77 | 9300.049708 | 91.00057739 | 9300.049708 | 91.00057739 |
| AGPAT180          | 27.453<br>2  | 9300.222929 | 338.7664436 | 9300.222929 | 338.7664436 |
| AGPAT141          | 27.453<br>2  | 18651.92002 | 679.4078658 | 18651.92002 | 679.4078658 |
| AGPAT161          | 27.453<br>2  | 576000      | 20981.16067 | 576000      | 20981.16067 |
| DASYN120          | 31.453<br>8  | 9544.492519 | 303.4448149 | 9544.492519 | 303.4448149 |
| EAR40x            | 111.45<br>58 | 44179.31434 | 396.3841661 | 44179.31434 | 396.3841661 |
| EAR60y            | 111.45<br>58 | 14300.64672 | 128.3077841 | 14300.64672 | 128.3077841 |
| MLDEP1pp          | 60.273<br>3  | 42680.98235 | 708.1242001 | 42680.98235 | 708.1242001 |
| MLDEP2pp          | 60.273<br>3  | 29895.31519 | 495.9959915 | 29895.31519 | 495.9959915 |
| MLTGY2pp_num<br>1 | 49.417<br>5  | 72155.37283 | 1460.117829 | 72155.37283 | 1460.117829 |

|                   |              |             |             |             |             |
|-------------------|--------------|-------------|-------------|-------------|-------------|
| MLTGY2pp_num<br>2 | 22.226<br>6  | 72155.37283 | 3246.352246 | 72155.37283 | 3246.352246 |
| MLTGY2pp_num<br>3 | 40.410<br>6  | 72155.37283 | 1785.555593 | 72155.37283 | 1785.555593 |
| MLTGY2pp_num<br>4 | 40.112<br>5  | 72155.37283 | 1798.825125 | 72155.37283 | 1798.825125 |
| MLTGY2pp_num<br>5 | 73.353<br>2  | 72155.37283 | 983.670417  | 72155.37283 | 983.670417  |
| MLTGY2pp_num<br>6 | 40.255<br>8  | 72155.37283 | 1792.421783 | 72155.37283 | 1792.421783 |
| MLTGY2pp_num<br>7 | 58.302<br>2  | 72155.37283 | 1237.609779 | 72155.37283 | 1237.609779 |
| MLTGY2pp_num<br>8 | 38.247<br>4  | 72155.37283 | 1886.543212 | 72155.37283 | 1886.543212 |
| MLTGY4pp_num<br>1 | 49.417<br>5  | 14600.99625 | 295.4620581 | 14600.99625 | 295.4620581 |
| MLTGY4pp_num<br>2 | 40.112<br>5  | 14600.99625 | 364.0011531 | 14600.99625 | 364.0011531 |
| MLTGY4pp_num<br>3 | 40.255<br>8  | 14600.99625 | 362.7054053 | 14600.99625 | 362.7054053 |
| MLTGY4pp_num<br>4 | 73.353<br>2  | 14600.99625 | 199.0505698 | 14600.99625 | 199.0505698 |
| MLTGY4pp_num<br>5 | 40.410<br>6  | 14600.99625 | 361.3159977 | 14600.99625 | 361.3159977 |
| MLTGY4pp_num<br>6 | 22.226<br>6  | 14600.99625 | 656.9154191 | 14600.99625 | 656.9154191 |
| MLTGY4pp_num<br>7 | 58.302<br>2  | 14600.99625 | 250.4364545 | 14600.99625 | 250.4364545 |
| MLTGY4pp_num<br>8 | 38.247<br>4  | 14600.99625 | 381.7513414 | 14600.99625 | 381.7513414 |
| EAR60x            | 111.45<br>58 | 13560.4688  | 121.6667845 | 13560.4688  | 121.6667845 |
| EAR80x            | 111.45<br>58 | 14706.89696 | 131.9527289 | 14706.89696 | 131.9527289 |
| NTP11             | 36.425<br>3  | 10027.83356 | 275.2985852 | 10027.83356 | 275.2985852 |
| 3OAS180_num1      | 86.091<br>5  | 16822.95266 | 195.4078237 | 16822.95266 | 195.4078237 |
| 3OAS180_num2      | 85.226<br>6  | 16822.95266 | 197.3908693 | 16822.95266 | 197.3908693 |
| 3HAD180_num1      | 37.938<br>1  | 9449.861839 | 249.0863232 | 9449.861839 | 249.0863232 |
| 3HAD180_num2      | 102.19<br>77 | 9449.861839 | 92.46648251 | 9449.861839 | 92.46648251 |

|                   |         |             |             |             |             |
|-------------------|---------|-------------|-------------|-------------|-------------|
| CDAPPA120         | 28.4508 | 31900.48775 | 1121.250993 | 31900.48775 | 1121.250993 |
| PSSA120           | 52.8018 | 21806.89222 | 412.9952429 | 21806.89222 | 412.9952429 |
| PSD120            | 35.9344 | 38651.46836 | 1075.611903 | 38651.46836 | 1075.611903 |
| PAPA120           | 29.0213 | 36805.00327 | 1268.206568 | 36805.00327 | 1268.206568 |
| MDDEP1pp_num<br>1 | 21.0399 | 30020.38301 | 1426.831069 | 30020.38301 | 1426.831069 |
| MDDEP1pp_num<br>2 | 29.9166 | 30020.38301 | 1003.469078 | 30020.38301 | 1003.469078 |
| MDDEP1pp_num<br>3 | 60.2733 | 30020.38301 | 498.0710034 | 30020.38301 | 498.0710034 |
| MDDEP1pp_num<br>4 | 51.7983 | 30020.38301 | 579.563094  | 30020.38301 | 579.563094  |
| MDDEP1pp_num<br>5 | 33.8874 | 30020.38301 | 885.8862885 | 30020.38301 | 885.8862885 |
| MDDEP1pp_num<br>6 | 49.0578 | 30020.38301 | 611.9390395 | 30020.38301 | 611.9390395 |
| MDDEP1pp_num<br>7 | 41.849  | 30020.38301 | 717.3500684 | 30020.38301 | 717.3500684 |
| MDDEP2pp_num<br>1 | 21.0399 | 194468.9023 | 9242.862479 | 194468.9023 | 9242.862479 |
| MDDEP2pp_num<br>2 | 29.9166 | 194468.9023 | 6500.367765 | 194468.9023 | 6500.367765 |
| MDDEP2pp_num<br>3 | 60.2733 | 194468.9023 | 3226.451883 | 194468.9023 | 3226.451883 |
| MDDEP2pp_num<br>4 | 51.7983 | 194468.9023 | 3754.349125 | 194468.9023 | 3754.349125 |
| MDDEP2pp_num<br>5 | 33.8874 | 194468.9023 | 5738.67875  | 194468.9023 | 5738.67875  |
| MDDEP2pp_num<br>6 | 49.0578 | 194468.9023 | 3964.077115 | 194468.9023 | 3964.077115 |
| MDDEP2pp_num<br>7 | 41.849  | 194468.9023 | 4646.918738 | 194468.9023 | 4646.918738 |
| PSD181            | 35.9344 | 18069.53214 | 502.8477485 | 18069.53214 | 502.8477485 |
| DAGK180           | 39.734  | 9300.360269 | 234.0655426 | 9300.360269 | 234.0655426 |
| DAGK181           | 39.734  | 13406.26531 | 337.4003451 | 13406.26531 | 337.4003451 |
| PLIPA2E120pp      | 66.3263 | 10490.57744 | 158.166179  | 10490.57744 | 158.166179  |
| PLIPA2G141pp      | 66.326  | 9300.051727 | 140.216652  | 9300.051727 | 140.216652  |

|                |              |             |             |             |             |
|----------------|--------------|-------------|-------------|-------------|-------------|
|                | 3            |             |             |             |             |
| PLIPA2G161pp   | 66.326<br>3  | 11859.91282 | 178.811615  | 11859.91282 | 178.811615  |
| LPLIPAL1A120pp | 94.488<br>6  | 9607.451501 | 101.6784194 | 9607.451501 | 101.6784194 |
| LPLIPAL1A140pp | 94.488<br>6  | 21414.67088 | 226.6376142 | 21414.67088 | 226.6376142 |
| LPLIPAL1A181pp | 94.488<br>6  | 15755.14779 | 166.7412555 | 15755.14779 | 166.7412555 |
| LPLIPAL1E120pp | 94.488<br>6  | 18049.24557 | 191.0203514 | 18049.24557 | 191.0203514 |
| 3OAR180        | 102.24<br>12 | 9346.605887 | 91.41721622 | 9346.605887 | 91.41721622 |
| G3PAT120       | 100.02<br>1  | 9886.455119 | 98.84379399 | 9886.455119 | 98.84379399 |
| PGSA120        | 20.700<br>6  | 9537.672938 | 460.7437919 | 9537.672938 | 460.7437919 |
| NADHPO         | 319.96<br>86 | 10193.77953 | 31.85868715 | 10193.77953 | 31.85868715 |
| ACOAD7f        | 89.224<br>4  | 168849.2482 | 1892.411137 | 168849.2482 | 1892.411137 |
| ACOAD8f        | 89.224<br>4  | 76148.30066 | 853.4470466 | 76148.30066 | 853.4470466 |
| ACOAD5f        | 89.224<br>4  | 223003.5589 | 2499.356217 | 223003.5589 | 2499.356217 |
| ACOAD3f        | 89.224<br>4  | 374885.7826 | 4201.606092 | 374885.7826 | 4201.606092 |
| ACOAD2f        | 89.224<br>4  | 426233.6705 | 4777.097638 | 426233.6705 | 4777.097638 |
| ACOAD4f        | 89.224<br>4  | 185797.065  | 2082.357124 | 185797.065  | 2082.357124 |
| ACOAD6f        | 89.224<br>4  | 208640.9014 | 2338.383911 | 208640.9014 | 2338.383911 |
| NADH16pp       | 540.41<br>42 | 700176.037  | 1295.628496 | 5400000     | 9992.335509 |
| NADH18pp       | 540.41<br>42 | 12049.1586  | 22.29615469 | 12049.1586  | 22.29615469 |
| CTBTCAL2       | 58.559<br>1  | 10877.64559 | 185.7549995 | 10877.64559 | 185.7549995 |
| BGLA1_num1     | 53.934<br>9  | 37406.12216 | 693.5420695 | 37406.12216 | 693.5420695 |
| BGLA1_num2     | 202.05       | 37406.12216 | 185.1329976 | 37406.12216 | 185.1329976 |
| BGLA1_num3     | 53.161       | 37406.12216 | 703.6344515 | 37406.12216 | 703.6344515 |

|              |              |             |             |             |             |
|--------------|--------------|-------------|-------------|-------------|-------------|
|              | 3            |             |             |             |             |
| GDPMNP       | 43.497<br>3  | 58494.91914 | 1344.794255 | 58494.91914 | 1344.794255 |
| AMMQLT8      | 28.073<br>2  | 25407.58414 | 905.047666  | 25407.58414 | 905.047666  |
| FA120ACPHi   | 22.961<br>1  | 17684.13687 | 770.1781217 | 17684.13687 | 770.1781217 |
| FA80ACPHi    | 22.961<br>1  | 9507.786649 | 414.0823675 | 9507.786649 | 414.0823675 |
| FA140ACPHi   | 22.961<br>1  | 100253.0484 | 4366.212784 | 100253.0484 | 4366.212784 |
| FA100ACPHi   | 22.961<br>1  | 9507.909798 | 414.0877309 | 9507.909798 | 414.0877309 |
| CRNDAL2      | 58.559<br>1  | 20216.42014 | 345.2310596 | 20216.42014 | 345.2310596 |
| CRNCAL2      | 58.559<br>1  | 10143.28302 | 173.2144623 | 10143.28302 | 173.2144623 |
| FRULYSE      | 249.35<br>06 | 20347.52166 | 81.60205614 | 20347.52166 | 81.60205614 |
| OXCDC        | 242.32<br>49 | 11287.64711 | 46.58063248 | 11287.64711 | 46.58063248 |
| LPLIPAL2A140 | 38.978<br>3  | 9300.044372 | 238.5954332 | 9300.044372 | 238.5954332 |
| LPLIPAL2A160 | 38.978<br>3  | 10123.72369 | 259.7271736 | 10123.72369 | 259.7271736 |
| LPLIPAL2A161 | 38.978<br>3  | 25406.02561 | 651.7992219 | 25406.02561 | 651.7992219 |
| LPLIPAL2A180 | 38.978<br>3  | 18839.70967 | 483.3384132 | 18839.70967 | 483.3384132 |
| LPLIPAL2A181 | 38.978<br>3  | 13091.78521 | 335.8736838 | 13091.78521 | 335.8736838 |
| UM3PL        | 49.874<br>1  | 9421.28154  | 188.9012842 | 9421.28154  | 188.9012842 |
| UM4PL        | 49.874<br>1  | 9308.520536 | 186.6403712 | 9308.520536 | 186.6403712 |
| 2MAHMP_num1  | 30.370<br>9  | 10170.48834 | 334.8760931 | 10170.48834 | 334.8760931 |
| 2MAHMP_num2  | 17.432<br>9  | 10170.48834 | 583.4077139 | 10170.48834 | 583.4077139 |
| PLIPA1A120pp | 66.326<br>3  | 9300.040452 | 140.216482  | 9300.040452 | 140.216482  |
| PLIPA1A140pp | 66.326<br>3  | 9300.04132  | 140.2164951 | 9300.04132  | 140.2164951 |

|                |              |             |             |             |             |
|----------------|--------------|-------------|-------------|-------------|-------------|
| PLIPA1A141pp   | 66.326<br>3  | 9300.070328 | 140.2169325 | 9300.070328 | 140.2169325 |
| PLIPA1A160pp   | 66.326<br>3  | 12745.09621 | 192.1575032 | 12745.09621 | 192.1575032 |
| PLIPA1A161pp   | 66.326<br>3  | 21566.39233 | 325.1559687 | 21566.39233 | 325.1559687 |
| PLIPA1A180pp   | 66.326<br>3  | 12246.46773 | 184.639694  | 12246.46773 | 184.639694  |
| LPLIPAL2A120   | 38.978<br>3  | 9300.07543  | 238.5962299 | 9300.07543  | 238.5962299 |
| KDUI           | 186.45<br>81 | 45006.1627  | 241.3741355 | 45006.1627  | 241.3741355 |
| NADH17pp       | 540.41<br>42 | 134714.4577 | 249.280011  | 134714.4577 | 249.280011  |
| FA161ACPHi     | 22.961<br>1  | 72014.93431 | 3136.388688 | 72014.93431 | 3136.388688 |
| FA141ACPHi     | 22.961<br>1  | 467514.5519 | 20361.15656 | 467514.5519 | 20361.15656 |
| FA160ACPHi     | 22.961<br>1  | 34673.13241 | 1510.081503 | 34673.13241 | 1510.081503 |
| DTARTD         | 120.21<br>06 | 45441.45666 | 378.0153885 | 45441.45666 | 378.0153885 |
| PLIPA2E161pp   | 66.326<br>3  | 9331.080116 | 140.6844663 | 9331.080116 | 140.6844663 |
| PLIPA2E180pp   | 66.326<br>3  | 9300.046288 | 140.21657   | 9300.046288 | 140.21657   |
| PLIPA2G120pp   | 66.326<br>3  | 9331.096327 | 140.6847107 | 9331.096327 | 140.6847107 |
| PLIPA2G180pp   | 66.326<br>3  | 11670.73496 | 175.9593851 | 11670.73496 | 175.9593851 |
| LPLIPAL1A161pp | 94.488<br>6  | 14398.00521 | 152.3782256 | 14398.00521 | 152.3782256 |
| LPLIPAL1A160pp | 94.488<br>6  | 313499.2089 | 3317.852195 | 313499.2089 | 3317.852195 |
| GALCTLO        | 36.447<br>9  | 21845.1942  | 599.3539875 | 21845.1942  | 599.3539875 |
| THRA_num1      | 90.633<br>2  | 53168.68951 | 586.6359073 | 53168.68951 | 586.6359073 |
| THRA_num2      | 145.97<br>88 | 53168.68951 | 364.2219933 | 53168.68951 | 364.2219933 |
| XYLK2_num1     | 122.17<br>88 | 44532.4874  | 364.4862071 | 44532.4874  | 364.4862071 |
| XYLK2_num2     | 110.30<br>97 | 44532.4874  | 403.7041838 | 44532.4874  | 403.7041838 |

|                  |              |             |             |             |             |
|------------------|--------------|-------------|-------------|-------------|-------------|
| GLDBRAN2         | 73.576<br>7  | 31696.23254 | 430.7917118 | 31696.23254 | 430.7917118 |
| POR5_num1        | 148.56<br>14 | 16213.79769 | 109.1386975 | 16213.79769 | 109.1386975 |
| POR5_num2        | 148.52<br>46 | 16213.79769 | 109.1657388 | 16213.79769 | 109.1657388 |
| HACD8_num1       | 159.18<br>78 | 30181.25367 | 189.5952684 | 30181.25367 | 189.5952684 |
| HACD8_num2       | 77.072<br>2  | 30181.25367 | 391.5971475 | 30181.25367 | 391.5971475 |
| CTECOAI8         | 159.18<br>78 | 29862.20361 | 187.5910315 | 29862.20361 | 187.5910315 |
| CTECOAI6         | 159.18<br>78 | 24446.50672 | 153.5702278 | 24446.50672 | 153.5702278 |
| MALCOAMT         | 28.276<br>2  | 9301.412639 | 328.9484669 | 9301.412639 | 328.9484669 |
| OGMEACPS         | 67.030<br>2  | 0.2448      | 0.003652085 | 0.2448      | 0.003652085 |
| OGMEACPR         | 102.24<br>12 | 0.1224      | 0.001197169 | 0.1224      | 0.001197169 |
| OPMEACPS         | 85.226<br>6  | 0.0864      | 0.001013768 | 0.0864      | 0.001013768 |
| DGUNC_num1       | 51.782<br>5  | 17685.97519 | 341.5434788 | 17685.97519 | 341.5434788 |
| DGUNC_num2       | 38.545<br>6  | 17685.97519 | 458.8325306 | 17685.97519 | 458.8325306 |
| DGUNC_num3       | 185.80<br>88 | 17685.97519 | 95.1837329  | 17685.97519 | 95.1837329  |
| DGUNC_num4       | 67.727       | 17685.97519 | 261.1362557 | 17685.97519 | 261.1362557 |
| DGUNC_num5       | 106.35<br>54 | 17685.97519 | 166.2912761 | 17685.97519 | 166.2912761 |
| CDGUNPD_num<br>1 | 74.665       | 126921.3273 | 1699.877149 | 126921.3273 | 1699.877149 |
| CDGUNPD_num<br>2 | 180.52<br>08 | 126921.3273 | 703.0842282 | 126921.3273 | 703.0842282 |
| CDGUNPD_num<br>3 | 171.21<br>53 | 126921.3273 | 741.2966443 | 126921.3273 | 741.2966443 |
| CDGUNPD_num<br>4 | 29.601<br>2  | 126921.3273 | 4287.708854 | 126921.3273 | 4287.708854 |
| CDGUNPD_num<br>5 | 81.449<br>8  | 126921.3273 | 1558.276722 | 126921.3273 | 1558.276722 |
| LDGUNPD          | 74.665       | 44519.35518 | 596.2546733 | 44519.35518 | 596.2546733 |
| MPTAT            | 63.667       | 2448        | 38.45006047 | 2448        | 38.45006047 |

|            |              |             |             |             |             |
|------------|--------------|-------------|-------------|-------------|-------------|
| MOADSUx    | 107.69<br>49 | 36042.55733 | 334.6728334 | 36042.55733 | 334.6728334 |
| REPHACCOAI | 28.404<br>6  | 19156.91578 | 674.4300494 | 19156.91578 | 674.4300494 |
| ACPPAT141  | 46.854       | 36607.03398 | 781.3000807 | 36607.03398 | 781.3000807 |
| ACPPAT161  | 46.854       | 40006.80572 | 853.8610519 | 40006.80572 | 853.8610519 |
| ACPPAT180  | 46.854       | 9699.07613  | 207.006363  | 9699.07613  | 207.006363  |
| APG3PAT160 | 22.193<br>4  | 18407.65507 | 829.4202361 | 18407.65507 | 829.4202361 |
| APG3PAT161 | 22.193<br>4  | 9694.949292 | 436.8392987 | 9694.949292 | 436.8392987 |
| APG3PAT180 | 22.193<br>4  | 47472.73186 | 2139.047278 | 47472.73186 | 2139.047278 |
| ICYSDS     | 90.179       | 36          | 0.399206024 | 36          | 0.399206024 |
| I4FE4SR    | 13.848<br>6  | 7.2         | 0.51990815  | 7.2         | 0.51990815  |
| S2FE2ST    | 183.33<br>3  | 9301.245664 | 50.7341595  | 9301.245664 | 50.7341595  |
| BMOCOS     | 88.134<br>5  | 72          | 0.81693321  | 72          | 0.81693321  |
| BWCOS      | 88.134<br>5  | 10232.07313 | 116.096116  | 10232.07313 | 116.096116  |
| BWCOGDS1   | 21.642<br>9  | 25790.66276 | 1191.645424 | 25790.66276 | 1191.645424 |
| BWCOGDS2   | 21.642<br>9  | 29065.07453 | 1342.938078 | 29065.07453 | 1342.938078 |
| DHNPTE     | 108.95<br>62 | 19512.83723 | 179.0888195 | 19512.83723 | 179.0888195 |
| DHMPTR     | 26.348<br>3  | 37100.23214 | 1408.069293 | 37100.23214 | 1408.069293 |
| I2FE2SS    | 104.02<br>76 | 9421.285561 | 90.56524962 | 9421.285561 | 90.56524962 |
| I2FE2ST    | 60.072<br>8  | 9353.641428 | 155.7051016 | 9353.641428 | 155.7051016 |
| I2FE2SS2   | 104.02<br>76 | 9497.407543 | 91.29699756 | 9497.407543 | 91.29699756 |
| I4FE4ST    | 60.072<br>8  | 9505.115485 | 158.2266098 | 9505.115485 | 158.2266098 |
| S4FE4ST    | 183.33<br>3  | 45270.43078 | 246.9300714 | 45270.43078 | 246.9300714 |
| S2FE2SS2   | 277.20<br>1  | 25109.73651 | 90.58313825 | 25109.73651 | 90.58313825 |
| BTS5       | 77.296       | 7.2         | 0.093148175 | 7.2         | 0.093148175 |

|            |              |             |             |             |             |
|------------|--------------|-------------|-------------|-------------|-------------|
|            | 2            |             |             |             |             |
| 3AMACHYD   | 28.898<br>1  | 21702.14096 | 750.9885066 | 21702.14096 | 750.9885066 |
| CCGS       | 25.514<br>2  | 18471.57179 | 723.9722112 | 18471.57179 | 723.9722112 |
| CDGR       | 65.175       | 18930.24966 | 290.4526224 | 18930.24966 | 290.4526224 |
| MSAR_num1  | 21.570<br>4  | 16893.06136 | 783.1593924 | 16893.06136 | 783.1593924 |
| MSAR_num2  | 108.99<br>57 | 16893.06136 | 154.9883285 | 16893.06136 | 154.9883285 |
| ACPPAT120  | 46.854       | 14929.35902 | 318.6357411 | 14929.35902 | 318.6357411 |
| CPH4S      | 82.637<br>3  | 15951.34398 | 193.0283779 | 15951.34398 | 193.0283779 |
| SHCHCS3    | 27.682<br>4  | 47273.15239 | 1707.697035 | 47273.15239 | 1707.697035 |
| URACPAH    | 25.208<br>7  | 23399.76966 | 928.2418236 | 23399.76966 | 928.2418236 |
| POAACR     | 13.762<br>9  | 17716.71901 | 1287.280952 | 17716.71901 | 1287.280952 |
| ACPPAT160  | 46.854       | 20129.32772 | 429.6181269 | 20129.32772 | 429.6181269 |
| ACPPAT181  | 46.854       | 14737.83642 | 314.5480946 | 14737.83642 | 314.5480946 |
| APH141     | 10.299<br>8  | 9504.151621 | 922.7510846 | 9504.151621 | 922.7510846 |
| APH161     | 10.299<br>8  | 10164.79521 | 986.8924847 | 10164.79521 | 986.8924847 |
| APH180     | 10.299<br>8  | 11053.15404 | 1073.142589 | 11053.15404 | 1073.142589 |
| APH181     | 10.299<br>8  | 17581.02807 | 1706.929073 | 17581.02807 | 1706.929073 |
| GTHPi      | 20.469<br>6  | 21215.21356 | 1036.425409 | 21215.21356 | 1036.425409 |
| SEPHCHCS   | 122.73<br>41 | 24093.61572 | 196.3074298 | 24093.61572 | 196.3074298 |
| DHNCOAS    | 189.79<br>85 | 26258.64932 | 138.3501414 | 26258.64932 | 138.3501414 |
| DHNCOAT    | 59.781       | 11519.68616 | 192.6981174 | 11519.68616 | 192.6981174 |
| I2FE2SR    | 104.02<br>76 | 9301.724046 | 89.41592468 | 9301.724046 | 89.41592468 |
| TYRL       | 26.896<br>1  | 21.6        | 0.803090411 | 21.6        | 0.803090411 |
| THZPSN3    | 600.73<br>06 | 9779.036108 | 16.27857164 | 9779.036108 | 16.27857164 |
| APG3PAT120 | 22.193       | 9785.075695 | 440.9002539 | 9785.075695 | 440.9002539 |

|              |              |             |             |             |             |
|--------------|--------------|-------------|-------------|-------------|-------------|
|              | 4            |             |             |             |             |
| APH120       | 10.299<br>8  | 12612.9599  | 1224.582992 | 12612.9599  | 1224.582992 |
| MOCDS        | 21.513<br>8  | 18106.42146 | 841.6189356 | 18106.42146 | 841.6189356 |
| FORCT        | 91.656<br>4  | 37350.27356 | 407.5031701 | 37350.27356 | 407.5031701 |
| PACCOAE      | 131.96<br>3  | 22170.16111 | 168.0028577 | 22170.16111 | 168.0028577 |
| OXDHCOAT     | 70.681<br>2  | 25910.35692 | 366.580603  | 25910.35692 | 366.580603  |
| HADPCOAH3    | 51.732<br>6  | 21560.11817 | 416.7607692 | 21560.11817 | 416.7607692 |
| PYROX        | 59.968<br>2  | 22380.99194 | 373.214336  | 22380.99194 | 373.214336  |
| BMOGDS1      | 21.642<br>9  | 27337.89485 | 1263.134554 | 27337.89485 | 1263.134554 |
| MPTS         | 51.478       | 9753.689326 | 189.4729656 | 9753.689326 | 189.4729656 |
| MOCOS        | 88.134<br>5  | 72          | 0.81693321  | 72          | 0.81693321  |
| BMOGDS2      | 21.642<br>9  | 10255.58751 | 473.8545903 | 10255.58751 | 473.8545903 |
| S2FE2SR      | 277.20<br>1  | 21311.91823 | 76.88254454 | 21311.91823 | 76.88254454 |
| ACACT8r_num1 | 46.530<br>5  | 23737.87625 | 510.157343  | 23737.87625 | 510.157343  |
| ACACT8r_num2 | 81.752<br>4  | 23737.87625 | 290.3630505 | 23737.87625 | 290.3630505 |
| CTECOAI7     | 159.18<br>78 | 24212.59768 | 152.1008374 | 24212.59768 | 152.1008374 |
| FDH4pp_num1  | 170.10<br>61 | 32853.99749 | 193.1382678 | 32853.99749 | 193.1382678 |
| FDH4pp_num2  | 511.26<br>16 | 32853.99749 | 64.26063975 | 32853.99749 | 64.26063975 |
| FDH5pp_num1  | 511.26<br>16 | 29922.56645 | 58.5269194  | 29922.56645 | 58.5269194  |
| FDH5pp_num2  | 170.10<br>61 | 29922.56645 | 175.9053112 | 29922.56645 | 175.9053112 |
| ACPPAT140    | 46.854       | 9697.481201 | 206.9723226 | 9697.481201 | 206.9723226 |
| APG3PAT140   | 22.193<br>4  | 38886.36066 | 1752.15878  | 38886.36066 | 1752.15878  |
| APG3PAT141   | 22.193<br>4  | 25623.64564 | 1154.56152  | 25623.64564 | 1154.56152  |

|               |              |             |             |             |             |
|---------------|--------------|-------------|-------------|-------------|-------------|
| APG3PAT181    | 22.193<br>4  | 9481.372614 | 427.2158666 | 9481.372614 | 427.2158666 |
| APH140        | 10.299<br>8  | 9504.202723 | 922.7560461 | 9504.202723 | 922.7560461 |
| APH160        | 10.299<br>8  | 19803.85527 | 1922.74173  | 19803.85527 | 1922.74173  |
| OPMEACPD      | 102.19<br>77 | 0.0792      | 0.000774969 | 0.0792      | 0.000774969 |
| EPMEACPR      | 111.45<br>58 | 0.108       | 0.000968994 | 0.108       | 0.000968994 |
| AOXSr2        | 83.188<br>5  | 3.6         | 0.043275212 | 3.6         | 0.043275212 |
| SCYSDS        | 120.46<br>82 | 30061.01064 | 249.5348203 | 30061.01064 | 249.5348203 |
| S2FE2SS       | 277.20<br>1  | 9300.815543 | 33.55260458 | 9300.815543 | 33.55260458 |
| S4FE4SR       | 156.73<br>28 | 74931.37607 | 478.0835669 | 74931.37607 | 478.0835669 |
| SELR          | 233.04<br>25 | 13273.52372 | 56.95752373 | 13273.52372 | 56.95752373 |
| OGMEACPD      | 102.19<br>77 | 0.0792      | 0.000774969 | 0.0792      | 0.000774969 |
| EGMEACPR      | 111.45<br>58 | 0.108       | 0.000968994 | 0.108       | 0.000968994 |
| OPMEACPR      | 102.24<br>12 | 0.1224      | 0.001197169 | 0.1224      | 0.001197169 |
| PMEACPE       | 28.505       | 14.4        | 0.505174531 | 14.4        | 0.505174531 |
| MECDPDH5_num1 | 60.383<br>8  | 9667.011089 | 160.0927913 | 9667.011089 | 160.0927913 |
| MECDPDH5_num2 | 60.420<br>6  | 9667.011089 | 159.9952845 | 9667.011089 | 159.9952845 |
| RNTR1c2_num1  | 179.78<br>21 | 49229.87641 | 273.8308008 | 49229.87641 | 273.8308008 |
| RNTR1c2_num2  | 242.42<br>48 | 49229.87641 | 203.0727731 | 49229.87641 | 203.0727731 |
| RNTR1c2_num3  | 242.38<br>81 | 49229.87641 | 203.1035204 | 49229.87641 | 203.1035204 |
| RNTR1c2_num4  | 179.74<br>53 | 49229.87641 | 273.8868633 | 49229.87641 | 273.8868633 |
| RNTR2c2_num1  | 242.42<br>48 | 30111.14447 | 124.2081853 | 30111.14447 | 124.2081853 |
| RNTR2c2_num2  | 242.38<br>81 | 30111.14447 | 124.2269916 | 30111.14447 | 124.2269916 |

|              |              |             |             |             |             |
|--------------|--------------|-------------|-------------|-------------|-------------|
| RNTR2c2_num3 | 179.74<br>53 | 30111.14447 | 167.5211784 | 30111.14447 | 167.5211784 |
| RNTR2c2_num4 | 179.78<br>21 | 30111.14447 | 167.4868881 | 30111.14447 | 167.4868881 |
| RNTR3c2_num1 | 179.74<br>53 | 34677.14107 | 192.9237709 | 34677.14107 | 192.9237709 |
| RNTR3c2_num2 | 242.42<br>48 | 34677.14107 | 143.0428779 | 34677.14107 | 143.0428779 |
| RNTR3c2_num3 | 242.38<br>81 | 34677.14107 | 143.064536  | 34677.14107 | 143.064536  |
| RNTR3c2_num4 | 179.78<br>21 | 34677.14107 | 192.8842809 | 34677.14107 | 192.8842809 |
| RNTR4c2_num1 | 179.78<br>21 | 16403.76147 | 91.24246223 | 16403.76147 | 91.24246223 |
| RNTR4c2_num2 | 242.42<br>48 | 16403.76147 | 67.66536043 | 16403.76147 | 67.66536043 |
| RNTR4c2_num3 | 242.38<br>81 | 16403.76147 | 67.67560565 | 16403.76147 | 67.67560565 |
| RNTR4c2_num4 | 179.74<br>53 | 16403.76147 | 91.26114268 | 16403.76147 | 91.26114268 |
| FLDR2_num1   | 47.451<br>1  | 47286.67079 | 996.534765  | 47286.67079 | 996.534765  |
| FLDR2_num2   | 47.487<br>9  | 47286.67079 | 995.7625161 | 47286.67079 | 995.7625161 |
| FESR         | 24.882<br>6  | 71840.53476 | 2887.179586 | 71840.53476 | 2887.179586 |
| OXCOAHDH     | 73.002<br>6  | 73883.66933 | 1012.069013 | 73883.66933 | 1012.069013 |
| DHACOAH      | 27.237<br>4  | 23116.39998 | 848.7006831 | 23116.39998 | 848.7006831 |
| THFAT        | 90.633<br>2  | 30546.82446 | 337.0379117 | 30546.82446 | 337.0379117 |
| FOMETRi      | 21.105<br>4  | 13204.69489 | 625.6548034 | 13204.69489 | 625.6548034 |
| GDPTPDP      | 79.342<br>4  | 184851.3609 | 2329.792909 | 184851.3609 | 2329.792909 |
| COLIPAKpp    | 26.759<br>1  | 30763.48947 | 1149.645895 | 30763.48947 | 1149.645895 |
| MPTSS        | 53.437<br>7  | 6120        | 114.5258872 | 6120        | 114.5258872 |
| CPMPS        | 142.14<br>99 | 19871.43998 | 139.7921489 | 19871.43998 | 139.7921489 |
| LIPOCT       | 23.882<br>5  | 9300.465425 | 389.4259573 | 9300.465425 | 389.4259573 |

|          |              |             |             |             |             |
|----------|--------------|-------------|-------------|-------------|-------------|
| LIPOS    | 72.143<br>4  | 9300.554147 | 128.9176023 | 9300.554147 | 128.9176023 |
| OCTNLL   | 37.925<br>9  | 22382.26906 | 590.1578884 | 22382.26906 | 590.1578884 |
| LIPATPT  | 37.925<br>9  | 25688.03264 | 677.3216361 | 25688.03264 | 677.3216361 |
| LIPAMPL  | 37.925<br>9  | 15754.36386 | 415.3985497 | 15754.36386 | 415.3985497 |
| ALDD19xr | 214.79<br>65 | 24043.86239 | 111.9378686 | 24043.86239 | 111.9378686 |
| MMM      | 155.74<br>25 | 728300.542  | 4676.31213  | 728300.542  | 4676.31213  |
| MOGDS    | 21.642<br>9  | 20487.08051 | 946.595905  | 20487.08051 | 946.595905  |
| WCOS     | 88.134<br>5  | 78540.19837 | 891.1402274 | 78540.19837 | 891.1402274 |
| VPAMTr   | 46.711<br>2  | 20916.2244  | 447.7775009 | 20916.2244  | 447.7775009 |
| 3OXCOAT  | 42.276<br>5  | 24123.2729  | 570.6071435 | 24123.2729  | 570.6071435 |
| 2DGULRGx | 70.791       | 17496.28312 | 247.1540609 | 17496.28312 | 247.1540609 |
| 2DGULRGy | 70.791       | 9611.080776 | 135.766987  | 9611.080776 | 135.766987  |
| AP4AS    | 115.65<br>31 | 23738.36358 | 205.2548836 | 23738.36358 | 205.2548836 |
| 13PPDH2  | 84.194       | 9783.379271 | 116.2004332 | 9783.379271 | 116.2004332 |
| APCS     | 64.642<br>8  | 13709.81887 | 212.0857832 | 13709.81887 | 212.0857832 |
| GHBDHx   | 124.63<br>26 | 21755.70782 | 174.5587256 | 21755.70782 | 174.5587256 |
| APPLDHr  | 309.69<br>76 | 10147.77107 | 32.76670877 | 10147.77107 | 32.76670877 |
| G2PP     | 29.172<br>1  | 10610.83138 | 363.732175  | 10610.83138 | 363.732175  |
| DHNPA2r  | 108.95<br>62 | 6120        | 56.1693598  | 6120        | 56.1693598  |
| SHGO     | 46.081<br>9  | 22357.77247 | 485.17471   | 22357.77247 | 485.17471   |
| NADHxD   | 54.650<br>3  | 65061.63673 | 1190.508318 | 65061.63673 | 1190.508318 |
| NADPHHR  | 142.13       | 36321.85019 | 255.5537197 | 36321.85019 | 255.5537197 |
| NADPHHS  | 142.13       | 34672.70059 | 243.9506128 | 34672.70059 | 243.9506128 |
| NADHHS   | 142.13       | 309125.5263 | 2174.949176 | 309125.5263 | 2174.949176 |
| NADHxE   | 54.650       | 13737.72351 | 251.3750795 | 13737.72351 | 251.3750795 |

|              |              |             |             |             |             |
|--------------|--------------|-------------|-------------|-------------|-------------|
|              | 3            |             |             |             |             |
| PYK2         | 205.42<br>86 | 27680.85888 | 134.7468604 | 27680.85888 | 134.7468604 |
| PYK3         | 205.42<br>86 | 45020.63808 | 219.1546751 | 45020.63808 | 219.1546751 |
| PYK4         | 205.42<br>86 | 23979.27789 | 116.7280403 | 23979.27789 | 116.7280403 |
| NADPHXD      | 54.650<br>3  | 10822.86747 | 198.0385737 | 10822.86747 | 198.0385737 |
| NADHHR       | 142.13       | 18063.29674 | 127.0899651 | 18063.29674 | 127.0899651 |
| NADPHXE      | 54.650<br>3  | 21725.95795 | 397.5450812 | 21725.95795 | 397.5450812 |
| FE3DHBZS3R   | 28.871<br>6  | 10690.26984 | 370.2693943 | 10690.26984 | 370.2693943 |
| DXYLTD_num1  | 69.399<br>2  | 77138.03722 | 1111.511908 | 77138.03722 | 1111.511908 |
| DXYLTD_num2  | 70.016<br>8  | 77138.03722 | 1101.70755  | 77138.03722 | 1101.70755  |
| 2DDARAA_num1 | 32.721<br>7  | 28422.21991 | 868.6046236 | 28422.21991 | 868.6046236 |
| 2DDARAA_num2 | 130.12<br>16 | 28422.21991 | 218.4281465 | 28422.21991 | 218.4281465 |
| GNP_num1     | 24.664<br>3  | 22285.81762 | 903.5657861 | 22285.81762 | 903.5657861 |
| GNP_num2     | 20.779<br>8  | 22285.81762 | 1072.475078 | 22285.81762 | 1072.475078 |
| ALLTAMH2     | 91.388       | 218031.9588 | 2385.783241 | 218031.9588 | 2385.783241 |
| UGCIAMH      | 28.730<br>4  | 257942.8563 | 8978.046124 | 257942.8563 | 8978.046124 |
| METGLCUR     | 273.78<br>8  | 48441.85139 | 176.9319743 | 48441.85139 | 176.9319743 |
| ACOAD1fr     | 43.002<br>1  | 42460.6505  | 987.4087662 | 42460.6505  | 987.4087662 |
| FEENTERES    | 45.651<br>9  | 22628.10623 | 495.6662533 | 22628.10623 | 495.6662533 |
| FEENTERR4    | 28.871<br>6  | 16687.14684 | 577.9779037 | 16687.14684 | 577.9779037 |
| ALR2x        | 36.328<br>8  | 36956.8215  | 1017.287152 | 36956.8215  | 1017.287152 |
| OMPHHXy      | 42.288<br>3  | 15108.67816 | 357.2779743 | 15108.67816 | 357.2779743 |
| SQVOSI       | 284.59<br>58 | 53182.41289 | 186.8699851 | 53182.41289 | 186.8699851 |

|            |              |             |             |             |             |
|------------|--------------|-------------|-------------|-------------|-------------|
| 6D6SPA     | 31.983       | 39442.55994 | 1233.235154 | 39442.55994 | 1233.235154 |
| AI2K       | 57.544<br>8  | 9941.061582 | 172.7534301 | 9941.061582 | 172.7534301 |
| ACOXT      | 83.341<br>5  | 16076.64152 | 192.9007939 | 16076.64152 | 192.9007939 |
| 2HESR_num1 | 64.783<br>2  | 27159.73869 | 419.2404619 | 27159.73869 | 419.2404619 |
| 2HESR_num2 | 49.031<br>8  | 27159.73869 | 553.9208981 | 27159.73869 | 553.9208981 |
| CHOLID     | 107.11<br>44 | 20571.09954 | 192.047937  | 20571.09954 | 192.047937  |
| 4ABZGLUH   | 197.56<br>37 | 9451.478628 | 47.84015802 | 9451.478628 | 47.84015802 |
| PHDA       | 204.10<br>06 | 32025.20046 | 156.9088991 | 32025.20046 | 156.9088991 |
| TEO2M      | 45.061<br>5  | 30564.75775 | 678.2898428 | 30564.75775 | 678.2898428 |
| PACOAT     | 59.403       | 9300.979224 | 156.574234  | 9300.979224 | 156.574234  |
| DHPTDNR    | 47.810<br>4  | 15829.23579 | 331.0835257 | 15829.23579 | 331.0835257 |
| DHPTDNRN   | 47.810<br>4  | 25764.69374 | 538.8930806 | 25764.69374 | 538.8930806 |
| PCNO       | 69.447<br>5  | 20632.68563 | 297.0976008 | 20632.68563 | 297.0976008 |
| HPACOAT    | 59.403       | 20199.22046 | 340.0370429 | 20199.22046 | 340.0370429 |
| DC6PDA     | 27.773<br>7  | 24868.36004 | 895.3924051 | 24868.36004 | 895.3924051 |
| 5DGLCNR    | 27.562<br>7  | 10326.6768  | 374.6612923 | 10326.6768  | 374.6612923 |
| 5DKGR_num1 | 27.07        | 10950.24371 | 404.515837  | 10950.24371 | 404.515837  |
| 5DKGR_num2 | 27.562<br>7  | 10950.24371 | 397.2848707 | 10950.24371 | 397.2848707 |
| PYK6       | 205.42<br>86 | 23858.79456 | 116.1415429 | 23858.79456 | 116.1415429 |
| PAI2I      | 11.254<br>8  | 9678.496108 | 859.9438557 | 9678.496108 | 859.9438557 |
| CURR       | 75.219<br>5  | 9968.899921 | 132.5307922 | 9968.899921 | 132.5307922 |
| LKDRA      | 173.49<br>61 | 14748.35399 | 85.00683297 | 14748.35399 | 85.00683297 |
| METNA      | 38.495<br>4  | 9848.755829 | 255.8424079 | 9848.755829 | 255.8424079 |
| XYHDL      | 528.47       | 174757.0033 | 330.6809337 | 174757.0033 | 330.6809337 |

|            |              |             |             |             |             |
|------------|--------------|-------------|-------------|-------------|-------------|
|            | 62           |             |             |             |             |
| E4PP_num1  | 29.707<br>7  | 23567.45492 | 793.3113274 | 23567.45492 | 793.3113274 |
| E4PP_num2  | 23.007<br>5  | 23567.45492 | 1024.33793  | 23567.45492 | 1024.33793  |
| E4PP_num3  | 30.412<br>8  | 23567.45492 | 774.918946  | 23567.45492 | 774.918946  |
| E4PP_num4  | 20.779<br>8  | 23567.45492 | 1134.152154 | 23567.45492 | 1134.152154 |
| E4PP_num5  | 24.330<br>2  | 23567.45492 | 968.650275  | 23567.45492 | 968.650275  |
| PUACGAMS   | 66.847<br>6  | 21535.02252 | 322.1510199 | 21535.02252 | 322.1510199 |
| RU5PP      | 23.007<br>5  | 9743.191204 | 423.4789179 | 9743.191204 | 423.4789179 |
| 6D6SFK     | 31.727<br>7  | 24036.90232 | 757.5998992 | 24036.90232 | 757.5998992 |
| 3SLAR      | 124.63<br>26 | 32163.07972 | 258.0631369 | 32163.07972 | 258.0631369 |
| ARHGDx     | 176.70<br>31 | 18504.6326  | 104.721607  | 18504.6326  | 104.721607  |
| CPL        | 31.845<br>1  | 55622.71588 | 1746.664821 | 55622.71588 | 1746.664821 |
| INOSTO     | 61.164<br>4  | 30029.78275 | 490.9683207 | 30029.78275 | 490.9683207 |
| HPYRP      | 21.435<br>6  | 20546.33029 | 958.5143541 | 20546.33029 | 958.5143541 |
| PSURIK     | 33.573       | 18771.63941 | 559.1290445 | 18771.63941 | 559.1290445 |
| QUINDHyi   | 62.455<br>6  | 9660.842064 | 154.6833601 | 9660.842064 | 154.6833601 |
| PNSPA      | 26.482<br>6  | 20269.59981 | 765.3931191 | 20269.59981 | 765.3931191 |
| 4HTHRK     | 67.247<br>3  | 25833.20273 | 384.1522668 | 25833.20273 | 384.1522668 |
| PETNT181pp | 63.804<br>4  | 70069.97275 | 1098.199697 | 70069.97275 | 1098.199697 |
| ARMEPNS    | 101.12<br>52 | 96018.1492  | 949.4977434 | 96018.1492  | 949.4977434 |
| RPNTPH     | 42.010<br>4  | 863642.4721 | 20557.82549 | 863642.4721 | 20557.82549 |
| PRCPD      | 55.695<br>6  | 35200.69678 | 632.0193477 | 35200.69678 | 632.0193477 |
| UDPGPT     | 52.408       | 67455.14386 | 1287.10312  | 67455.14386 | 1287.10312  |

|           |              |             |             |             |             |
|-----------|--------------|-------------|-------------|-------------|-------------|
|           | 5            |             |             |             |             |
| OMMBLHXy  | 42.953<br>5  | 21532.4983  | 501.2978756 | 21532.4983  | 501.2978756 |
| OPHHXy    | 44.244<br>6  | 9301.138592 | 210.2208765 | 9301.138592 | 210.2208765 |
| PROD3     | 287.63<br>03 | 61607.80649 | 214.1909475 | 61607.80649 | 214.1909475 |
| F1PP_num1 | 30.412<br>8  | 30106.44206 | 989.9266774 | 30106.44206 | 989.9266774 |
| F1PP_num2 | 20.779<br>8  | 30106.44206 | 1448.832138 | 30106.44206 | 1448.832138 |
| F1PP_num3 | 23.007<br>5  | 30106.44206 | 1308.549041 | 30106.44206 | 1308.549041 |
| F1PP_num4 | 29.721<br>1  | 30106.44206 | 1012.965269 | 30106.44206 | 1012.965269 |
| ACP1p     | 98.877<br>2  | 17920.62895 | 181.2412664 | 17920.62895 | 181.2412664 |
| 3HPADHi   | 53.418<br>6  | 29369.09112 | 549.7914794 | 29369.09112 | 549.7914794 |
| 2HPTCOAT  | 63.973<br>7  | 50248.12219 | 785.44968   | 50248.12219 | 785.44968   |
| MC6PH     | 202.05       | 1075510.261 | 5322.990653 | 1075510.261 | 5322.990653 |
| CYSTA     | 87.146<br>7  | 14883.03104 | 170.7813496 | 14883.03104 | 170.7813496 |
| FE3DCITR5 | 28.871<br>6  | 12098.3979  | 419.0414766 | 12098.3979  | 419.0414766 |
| 4HTHRA    | 145.97<br>88 | 168654.009  | 1155.332205 | 168654.009  | 1155.332205 |
| GAPP      | 24.330<br>2  | 71411.82725 | 2935.110572 | 71411.82725 | 2935.110572 |
| PAI2T     | 318.92<br>74 | 9523.524841 | 29.86110582 | 9523.524841 | 29.86110582 |
| DHCURR    | 75.219<br>5  | 9968.97298  | 132.5317634 | 9968.97298  | 132.5317634 |
| RHMND     | 353.81<br>17 | 28119.95353 | 79.47717255 | 28119.95353 | 79.47717255 |
| 3HBZCT    | 59.880<br>4  | 29600.99634 | 494.335314  | 29600.99634 | 494.335314  |
| CXSAMS    | 55.553<br>3  | 25116.46412 | 452.11471   | 25116.46412 | 452.11471   |
| ACOAD1f   | 89.224<br>4  | 434993.0386 | 4875.269977 | 434993.0386 | 4875.269977 |
| AMPNTAT   | 16.569       | 23261.95502 | 1403.876632 | 23261.95502 | 1403.876632 |

|                      |               |             |             |             |             |
|----------------------|---------------|-------------|-------------|-------------|-------------|
|                      | 8             |             |             |             |             |
| SQGH                 | 77.275        | 31386.49569 | 406.1662335 | 31386.49569 | 406.1662335 |
| QUINDH               | 62.455<br>6   | 9439.253176 | 151.1354174 | 9439.253176 | 151.1354174 |
| LCARSyi              | 37.978<br>4   | 9500.890252 | 250.1656271 | 9500.890252 | 250.1656271 |
| GTHOr_reverse        | 97.545        | 10041.29653 | 102.9401459 | 10041.29653 | 102.9401459 |
| MAN6PI_reverse       | 42.85         | 59947.56896 | 1399.009777 | 59947.56896 | 1399.009777 |
| TMDPP_reverse        | 94.414<br>2   | 12184.75745 | 129.0564073 | 12184.75745 | 129.0564073 |
| HCO3E_reverse_num1   | 100.38<br>71  | 17055.96902 | 169.9019996 | 17055.96902 | 169.9019996 |
| HCO3E_reverse_num2   | 47.528<br>5   | 17055.96902 | 358.8577174 | 17055.96902 | 358.8577174 |
| IMPC_reverse         | 57.329<br>2   | 36000       | 627.9522477 | 36000       | 627.9522477 |
| ECOAH4_reverse_num1  | 77.072<br>2   | 34389.94493 | 446.2042725 | 34389.94493 | 446.2042725 |
| ECOAH4_reverse_num2  | 159.18<br>78  | 34389.94493 | 216.0337974 | 34389.94493 | 216.0337974 |
| NDPK5_reverse_num1   | 23.586        | 10223.94078 | 433.4749758 | 10223.94078 | 433.4749758 |
| NDPK5_reverse_num2   | 61.853<br>8   | 10223.94078 | 165.2920399 | 10223.94078 | 165.2920399 |
| DHORTS_reverse       | 77.654<br>8   | 24480       | 315.2412987 | 24480       | 315.2412987 |
| ICDHyr_reverse       | 91.513<br>4   | 30368.82282 | 331.851104  | 30368.82282 | 331.851104  |
| ACALD_reverse_num1   | 33.442<br>5   | 142688.5307 | 4266.682534 | 142688.5307 | 4266.682534 |
| ACALD_reverse_num2   | 3845.0<br>896 | 142688.5307 | 37.10928626 | 142688.5307 | 37.10928626 |
| ALAR_reverse_num1    | 77.689<br>2   | 104292.6285 | 1342.434064 | 104292.6285 | 1342.434064 |
| ALAR_reverse_num2    | 78.305<br>9   | 104292.6285 | 1331.861692 | 104292.6285 | 1331.861692 |
| ALATA_L_reverse_num1 | 91.034<br>7   | 48870.10901 | 536.8294618 | 48870.10901 | 536.8294618 |
| ALATA_L_reverse_num2 | 92.432<br>4   | 48870.10901 | 528.7118912 | 48870.10901 | 528.7118912 |
| PPM_reverse          | 44.37         | 32423.2523  | 730.7471783 | 32423.2523  | 730.7471783 |
| ASPTA_reverse_num1   | 87.146<br>7   | 75600       | 867.5027282 | 75600       | 867.5027282 |

|                     |           |             |             |             |             |
|---------------------|-----------|-------------|-------------|-------------|-------------|
| ASPTA_reverse_num2  | 87.0756   | 75600       | 868.2110718 | 75600       | 868.2110718 |
| A5PISO_reverse_num1 | 140.7843  | 33180.19039 | 235.681041  | 33180.19039 | 235.681041  |
| A5PISO_reverse_num2 | 136.1257  | 33180.19039 | 243.7467017 | 33180.19039 | 243.7467017 |
| IPPMlb_reverse      | 72.3693   | 123242.3232 | 1702.964147 | 123242.3232 | 1702.964147 |
| PSCVT_reverse       | 46.0958   | 43650.2925  | 946.9472815 | 43650.2925  | 946.9472815 |
| ECOA6_reverse_num1  | 77.0722   | 46056.25922 | 597.5729151 | 46056.25922 | 597.5729151 |
| ECOA6_reverse_num2  | 159.1878  | 46056.25922 | 289.3202822 | 46056.25922 | 289.3202822 |
| ENO_reverse         | 91.3099   | 51877.32098 | 568.1456335 | 51877.32098 | 568.1456335 |
| FBA_reverse_num1    | 78.2945   | 34326.33312 | 438.4258552 | 34326.33312 | 438.4258552 |
| FBA_reverse_num2    | 381.0919  | 34326.33312 | 90.0736361  | 34326.33312 | 90.0736361  |
| PGI_reverse         | 123.0595  | 323462.6992 | 2628.506529 | 323462.6992 | 2628.506529 |
| PGK_reverse         | 41.1182   | 151200      | 3677.203769 | 151200      | 3677.203769 |
| RPE_reverse         | 24.5542   | 108366.9572 | 4413.377637 | 108366.9572 | 4413.377637 |
| TALA_reverse_num1   | 70.4385   | 17007.88862 | 241.4572801 | 17007.88862 | 241.4572801 |
| TALA_reverse_num2   | 35.6588   | 17007.88862 | 476.9618894 | 17007.88862 | 476.9618894 |
| TKT1_reverse_num1   | 144.4235  | 21768.90264 | 150.7296433 | 21768.90264 | 150.7296433 |
| TKT1_reverse_num2   | 73.0427   | 21768.90264 | 298.0298187 | 21768.90264 | 298.0298187 |
| ALCD2x_reverse_num1 | 3845.0896 | 86341.98017 | 22.45512827 | 86341.98017 | 22.45512827 |
| ALCD2x_reverse_num2 | 141.5183  | 86341.98017 | 610.1117677 | 86341.98017 | 610.1117677 |
| RMI_reverse         | 188.7978  | 18114.75932 | 95.94793647 | 18114.75932 | 95.94793647 |
| NDPK6_reverse_num1  | 23.586    | 9881.818517 | 418.9696649 | 9881.818517 | 418.9696649 |
| NDPK6_reverse_num2  | 61.8538   | 9881.818517 | 159.7608961 | 9881.818517 | 159.7608961 |

|                     |          |             |             |             |             |
|---------------------|----------|-------------|-------------|-------------|-------------|
| NDPK8_reverse_num1  | 23.586   | 14417.88494 | 611.2899576 | 14417.88494 | 611.2899576 |
| NDPK8_reverse_num2  | 61.8538  | 14417.88494 | 233.0961871 | 14417.88494 | 233.0961871 |
| PYNP2r_reverse      | 162.9545 | 10466.8948  | 64.23200833 | 10466.8948  | 64.23200833 |
| DURIPP_reverse_num1 | 94.4142  | 9672.277903 | 102.4451608 | 9672.277903 | 102.4451608 |
| DURIPP_reverse_num2 | 155.6995 | 9672.277903 | 62.12144485 | 9672.277903 | 62.12144485 |
| TRPAS2_reverse      | 211.0938 | 18000       | 85.27015005 | 18000       | 85.27015005 |
| ILETA_reverse       | 204.5619 | 21960       | 107.3513689 | 21960       | 107.3513689 |
| VALTA_reverse       | 204.5619 | 31680       | 154.8675486 | 31680       | 154.8675486 |
| ORPT_reverse        | 47.134   | 17956.83112 | 380.9740552 | 17956.83112 | 380.9740552 |
| PTAr_reverse_num1   | 463.0325 | 420628.6411 | 908.4214199 | 420628.6411 | 908.4214199 |
| PTAr_reverse_num2   | 72.1335  | 420628.6411 | 5831.252346 | 420628.6411 | 5831.252346 |
| ACKr_reverse_num1   | 42.4337  | 178357.4108 | 4203.201955 | 178357.4108 | 4203.201955 |
| ACKr_reverse_num2   | 43.2904  | 178357.4108 | 4120.02224  | 178357.4108 | 4120.02224  |
| ACKr_reverse_num3   | 43.3841  | 178357.4108 | 4111.123909 | 178357.4108 | 4111.123909 |
| AIRC3_reverse       | 142.2426 | 46800       | 329.0153583 | 46800       | 329.0153583 |
| ADSL2r_reverse      | 206.1712 | 15978.08037 | 77.49908994 | 15978.08037 | 77.49908994 |
| PUNP5_reverse_num1  | 179.0077 | 9894.50248  | 55.27417245 | 9894.50248  | 55.27417245 |
| PUNP5_reverse_num2  | 155.6995 | 9894.50248  | 63.54871069 | 9894.50248  | 63.54871069 |
| PUNP6_reverse_num1  | 155.6995 | 9464.634994 | 60.78783165 | 9464.634994 | 60.78783165 |
| PUNP6_reverse_num2  | 179.0077 | 9464.634994 | 52.87278141 | 9464.634994 | 52.87278141 |
| PUNP7_reverse       | 179.0077 | 32703.33227 | 182.6923214 | 32703.33227 | 182.6923214 |
| PUNP1_reverse       | 155.6995 | 36          | 0.231214615 | 36          | 0.231214615 |

|                    |              |             |             |             |             |
|--------------------|--------------|-------------|-------------|-------------|-------------|
| PUNP2_reverse      | 155.69<br>95 | 9843.444108 | 63.22078175 | 9843.444108 | 63.22078175 |
| PUNP3_reverse_num1 | 179.00<br>77 | 9803.384518 | 54.76515545 | 9803.384518 | 54.76515545 |
| PUNP3_reverse_num2 | 155.69<br>95 | 9803.384518 | 62.96349389 | 9803.384518 | 62.96349389 |
| LYSAM_reverse      | 38.749<br>6  | 25606.02051 | 660.8073504 | 25606.02051 | 660.8073504 |
| IPPM1a_reverse     | 72.369<br>3  | 106566.4071 | 1472.536104 | 106566.4071 | 1472.536104 |
| MDH_reverse        | 64.674<br>6  | 11663.48336 | 180.3410204 | 11663.48336 | 180.3410204 |
| FUM_reverse_num1   | 120.21<br>06 | 2156.14877  | 17.93642799 | 2156.14877  | 17.93642799 |
| FUM_reverse_num2   | 120.59<br>72 | 2156.14877  | 17.87892895 | 2156.14877  | 17.87892895 |
| FUM_reverse_num3   | 201.95<br>55 | 2156.14877  | 10.67635578 | 2156.14877  | 10.67635578 |
| OHPBAT_reverse     | 79.566<br>6  | 20025.08515 | 251.6770247 | 20025.08515 | 251.6770247 |
| AGPR_reverse       | 35.952<br>1  | 86400       | 2403.197588 | 86400       | 2403.197588 |
| G1SAT_reverse      | 90.732<br>2  | 38145.11774 | 420.4143374 | 38145.11774 | 420.4143374 |
| GUI1_reverse       | 53.987<br>2  | 18227.31552 | 337.6229091 | 18227.31552 | 337.6229091 |
| PGAMT_reverse      | 47.543<br>6  | 14400       | 302.8798829 | 14400       | 302.8798829 |
| GLUR_reverse       | 31.002       | 75600       | 2438.552351 | 75600       | 2438.552351 |
| UAG2E_reverse      | 84.489<br>2  | 64758.73007 | 766.4734672 | 64758.73007 | 766.4734672 |
| HACD5_reverse_num1 | 159.18<br>78 | 28543.86811 | 179.309395  | 28543.86811 | 179.309395  |
| HACD5_reverse_num2 | 77.072<br>2  | 28543.86811 | 370.3523205 | 28543.86811 | 370.3523205 |
| GHMT2r_reverse     | 90.633<br>2  | 36640.10614 | 404.2680401 | 36640.10614 | 404.2680401 |
| ADK4_reverse       | 23.586       | 27584.11545 | 1169.51223  | 27584.11545 | 1169.51223  |
| KARA1_reverse      | 216.27<br>61 | 8280        | 38.28439666 | 8280        | 38.28439666 |
| KARA2_reverse      | 216.27<br>61 | 11785.94812 | 54.49491701 | 11785.94812 | 54.49491701 |
| ICHORS_copy2_r     | 97.529       | 11143.4815  | 114.2580164 | 11143.4815  | 114.2580164 |

|                     |               |             |             |             |             |
|---------------------|---------------|-------------|-------------|-------------|-------------|
| everse              | 1             |             |             |             |             |
| DHBD_reverse        | 104.99<br>86  | 15751.76703 | 150.0188292 | 15751.76703 | 150.0188292 |
| RBP4E_reverse_num1  | 25.277<br>7   | 22153.75973 | 876.4151693 | 22153.75973 | 876.4151693 |
| RBP4E_reverse_num2  | 102.07<br>56  | 22153.75973 | 217.0328631 | 22153.75973 | 217.0328631 |
| RBP4E_reverse_num3  | 25.560<br>9   | 22153.75973 | 866.7049957 | 22153.75973 | 866.7049957 |
| HACD6_reverse_num1  | 159.18<br>78  | 28885.7992  | 181.457368  | 28885.7992  | 181.457368  |
| HACD6_reverse_num2  | 77.072<br>2   | 28885.7992  | 374.788824  | 28885.7992  | 374.788824  |
| ECOAH1_reverse_num1 | 77.072<br>2   | 55686.49906 | 722.5238031 | 55686.49906 | 722.5238031 |
| ECOAH1_reverse_num2 | 159.18<br>78  | 55686.49906 | 349.8163745 | 55686.49906 | 349.8163745 |
| ECOAH2_reverse_num1 | 77.072<br>2   | 45311.23192 | 587.9062998 | 45311.23192 | 587.9062998 |
| ECOAH2_reverse_num2 | 159.18<br>78  | 45311.23192 | 284.6401038 | 45311.23192 | 284.6401038 |
| ECOAH3_reverse_num1 | 77.072<br>2   | 38981.49761 | 505.7789658 | 38981.49761 | 505.7789658 |
| ECOAH3_reverse_num2 | 159.18<br>78  | 38981.49761 | 244.877419  | 38981.49761 | 244.877419  |
| UGLT_reverse        | 79.291<br>4   | 10608.99987 | 133.7976107 | 10608.99987 | 133.7976107 |
| XYLI2_reverse       | 198.96<br>8   | 58957.93451 | 296.3186769 | 58957.93451 | 296.3186769 |
| PMANM_reverse       | 50.462<br>6   | 15462.38488 | 306.4127666 | 15462.38488 | 306.4127666 |
| UDPG4E_reverse      | 74.530<br>2   | 59585.79647 | 799.4852619 | 59585.79647 | 799.4852619 |
| XYLI1_reverse       | 198.96<br>8   | 12143.93448 | 61.03461097 | 12143.93448 | 61.03461097 |
| LCARS_reverse       | 81.026<br>7   | 20440.77639 | 252.2721078 | 20440.77639 | 252.2721078 |
| ALCD19_reverse_num1 | 141.51<br>83  | 147353.7592 | 1041.234662 | 147353.7592 | 1041.234662 |
| ALCD19_reverse_num2 | 3845.0<br>896 | 147353.7592 | 38.32258142 | 147353.7592 | 38.32258142 |
| RMPA_reverse        | 120.58<br>2   | 10127.96802 | 83.99237053 | 10127.96802 | 83.99237053 |

|                    |              |             |             |             |             |
|--------------------|--------------|-------------|-------------|-------------|-------------|
| SBTPD_reverse      | 111.43<br>15 | 43431.09995 | 389.756038  | 43431.09995 | 389.756038  |
| GLTPD_reverse      | 74.780<br>3  | 26014.78708 | 347.8828927 | 26014.78708 | 347.8828927 |
| TGBPA_reverse_num1 | 172.36<br>71 | 11962.53261 | 69.40148445 | 11962.53261 | 69.40148445 |
| TGBPA_reverse_num2 | 77.920<br>6  | 11962.53261 | 153.5220803 | 11962.53261 | 153.5220803 |
| MANAO_reverse      | 53.580<br>2  | 66372.21763 | 1238.745239 | 66372.21763 | 1238.745239 |
| TAGURr_reverse     | 54.808<br>3  | 48756.38965 | 889.5804039 | 48756.38965 | 889.5804039 |
| HACD4_reverse_num1 | 159.18<br>78 | 31565.19803 | 198.2890525 | 31565.19803 | 198.2890525 |
| HACD4_reverse_num2 | 77.072<br>2  | 31565.19803 | 409.5536138 | 31565.19803 | 409.5536138 |
| HACD7_reverse_num1 | 77.072<br>2  | 23943.32058 | 310.6609203 | 23943.32058 | 310.6609203 |
| HACD7_reverse_num2 | 159.18<br>78 | 23943.32058 | 150.4092687 | 23943.32058 | 150.4092687 |
| ADK1_reverse       | 23.586       | 16170.04165 | 685.5779551 | 16170.04165 | 685.5779551 |
| SERASr_reverse     | 141.99<br>1  | 133230.4814 | 938.3022967 | 133230.4814 | 938.3022967 |
| MLTP2_reverse      | 181.04<br>48 | 20152.04116 | 111.3096933 | 20152.04116 | 111.3096933 |
| CYTK1_reverse      | 24.746<br>3  | 22437.44545 | 906.6989996 | 22437.44545 | 906.6989996 |
| CYTK2_reverse      | 24.746<br>3  | 10897.88195 | 440.3842979 | 10897.88195 | 440.3842979 |
| GK1_reverse        | 47.185<br>4  | 27785.55742 | 588.8592111 | 27785.55742 | 588.8592111 |
| HACD1_reverse_num1 | 159.18<br>78 | 41623.13358 | 261.4718815 | 41623.13358 | 261.4718815 |
| HACD1_reverse_num2 | 77.072<br>2  | 41623.13358 | 540.0537883 | 41623.13358 | 540.0537883 |
| HACD2_reverse_num1 | 159.18<br>78 | 39702.90928 | 249.4092467 | 39702.90928 | 249.4092467 |
| HACD2_reverse_num2 | 77.072<br>2  | 39702.90928 | 515.1391718 | 39702.90928 | 515.1391718 |
| NDPK7_reverse_num1 | 23.586       | 10352.40646 | 438.9216678 | 10352.40646 | 438.9216678 |
| NDPK7_reverse_num2 | 61.853<br>8  | 10352.40646 | 167.3689645 | 10352.40646 | 167.3689645 |

|                        |              |             |             |             |             |
|------------------------|--------------|-------------|-------------|-------------|-------------|
| GLYAT_reverse          | 86.234<br>1  | 50081.79355 | 580.7655388 | 50081.79355 | 580.7655388 |
| CRNBCTCT_revers<br>e   | 90.253<br>5  | 128941.3418 | 1428.657523 | 128941.3418 | 1428.657523 |
| CRNCBCT_revers<br>e    | 90.253<br>5  | 23925.28542 | 265.0898349 | 23925.28542 | 265.0898349 |
| CRNCDH_revers<br>e     | 28.190<br>2  | 14573.28508 | 516.9628127 | 14573.28508 | 516.9628127 |
| NDPK2_reverse_<br>num1 | 23.586       | 13143.65765 | 557.2652273 | 13143.65765 | 557.2652273 |
| NDPK2_reverse_<br>num2 | 61.853<br>8  | 13143.65765 | 212.4955565 | 13143.65765 | 212.4955565 |
| NDPK3_reverse_<br>num1 | 61.853<br>8  | 23476.2708  | 379.5445194 | 23476.2708  | 379.5445194 |
| NDPK3_reverse_<br>num2 | 23.586       | 23476.2708  | 995.3476976 | 23476.2708  | 995.3476976 |
| NDPK4_reverse_<br>num1 | 23.586       | 25751.50973 | 1091.813352 | 25751.50973 | 1091.813352 |
| NDPK4_reverse_<br>num2 | 61.853<br>8  | 25751.50973 | 416.328661  | 25751.50973 | 416.328661  |
| DGK1_reverse           | 47.185<br>4  | 10053.54912 | 213.0648277 | 10053.54912 | 213.0648277 |
| DTMPK_reverse          | 23.783<br>1  | 22465.87078 | 944.6149062 | 22465.87078 | 944.6149062 |
| NDPK1_reverse_<br>num1 | 23.586       | 9805.867045 | 415.7494719 | 9805.867045 | 415.7494719 |
| NDPK1_reverse_<br>num2 | 61.853<br>8  | 9805.867045 | 158.5329769 | 9805.867045 | 158.5329769 |
| PGMT_reverse_n<br>um1  | 58.361       | 29407.45925 | 503.8888855 | 29407.45925 | 503.8888855 |
| PGMT_reverse_n<br>um2  | 20.779<br>8  | 29407.45925 | 1415.194528 | 29407.45925 | 1415.194528 |
| PGMT_reverse_n<br>um3  | 23.564<br>9  | 29407.45925 | 1247.93482  | 29407.45925 | 1247.93482  |
| UMPK_reverse_n<br>um1  | 24.746<br>3  | 27813.81124 | 1123.958379 | 27813.81124 | 1123.958379 |
| UMPK_reverse_n<br>um2  | 155.82<br>16 | 27813.81124 | 178.49779   | 27813.81124 | 178.49779   |
| DDPGALA_rever<br>se    | 21.390<br>6  | 53869.17244 | 2518.357243 | 53869.17244 | 2518.357243 |
| F6PA_reverse_nu<br>m1  | 229.96<br>82 | 19796.27081 | 86.0826445  | 19796.27081 | 86.0826445  |
| F6PA_reverse_nu<br>m2  | 23.555<br>2  | 19796.27081 | 840.4204085 | 19796.27081 | 840.4204085 |

|                        |              |             |             |             |             |
|------------------------|--------------|-------------|-------------|-------------|-------------|
| IDOND_reverse          | 37.146<br>6  | 19846.42749 | 534.2730556 | 19846.42749 | 534.2730556 |
| MCOATA_revers<br>e     | 41.056<br>7  | 9518.869696 | 231.8469262 | 9518.869696 | 231.8469262 |
| DAPE_reverse           | 60.417<br>1  | 109969.7887 | 1820.176552 | 109969.7887 | 1820.176552 |
| SDPTA_reverse_n<br>um1 | 91.549<br>3  | 27000       | 294.9230633 | 27000       | 294.9230633 |
| SDPTA_reverse_n<br>um2 | 44.729<br>1  | 27000       | 603.6338759 | 27000       | 603.6338759 |
| SDPTA_reverse_n<br>um3 | 87.533<br>9  | 27000       | 308.4519255 | 27000       | 308.4519255 |
| SDPTA_reverse_n<br>um4 | 87.330<br>7  | 27000       | 309.1696276 | 27000       | 309.1696276 |
| SDPTA_reverse_n<br>um5 | 79.566<br>6  | 27000       | 339.3383656 | 27000       | 339.3383656 |
| ARAI_reverse           | 336.44<br>39 | 37923.43532 | 112.7184512 | 37923.43532 | 112.7184512 |
| M1PD_reverse           | 41.139       | 24491.61456 | 595.3381113 | 24491.61456 | 595.3381113 |
| G3PD2_reverse          | 72.723<br>2  | 122400      | 1683.094253 | 122400      | 1683.094253 |
| FCI_reverse            | 389.86       | 60125.13198 | 154.222367  | 60125.13198 | 154.222367  |
| FCLPA_reverse_n<br>um1 | 23.222<br>5  | 19739.33073 | 850.0088589 | 19739.33073 | 850.0088589 |
| FCLPA_reverse_n<br>um2 | 95.101<br>3  | 19739.33073 | 207.561103  | 19739.33073 | 207.561103  |
| UAGAAT_reverse         | 92.879<br>5  | 9875.081682 | 106.3214346 | 9875.081682 | 106.3214346 |
| PRPPS_reverse          | 34.218<br>3  | 9727.446006 | 284.2761331 | 9727.446006 | 284.2761331 |
| PRMICI_reverse         | 26.032<br>6  | 38487.18989 | 1478.422819 | 38487.18989 | 1478.422819 |
| SERAT_reverse          | 175.89<br>98 | 56837.93429 | 323.1267704 | 56837.93429 | 323.1267704 |
| ASPK_reverse_nu<br>m1  | 177.77<br>54 | 131867.8614 | 741.7666415 | 131867.8614 | 741.7666415 |
| ASPK_reverse_nu<br>m2  | 356.48<br>1  | 131867.8614 | 369.9155394 | 131867.8614 | 369.9155394 |
| ASPK_reverse_nu<br>m3  | 97.063<br>5  | 131867.8614 | 1358.573113 | 131867.8614 | 1358.573113 |
| ASAD_reverse           | 80.035<br>8  | 22680       | 283.3731905 | 22680       | 283.3731905 |
| CBMKr_reverse          | 31.644       | 10062.30195 | 317.9835087 | 10062.30195 | 317.9835087 |

|                         |              |             |             |             |             |
|-------------------------|--------------|-------------|-------------|-------------|-------------|
|                         | 1            |             |             |             |             |
| AMANAPEr_reve<br>rse    | 24.073<br>7  | 586980.0616 | 24382.62758 | 586980.0616 | 24382.62758 |
| NNATr_reverse           | 24.528       | 41349.30422 | 1685.800074 | 41349.30422 | 1685.800074 |
| GAPD_reverse            | 142.13       | 56839.88531 | 399.9147633 | 56839.88531 | 399.9147633 |
| ARGSL_reverse           | 50.318<br>2  | 10424.18161 | 207.1652327 | 10424.18161 | 207.1652327 |
| ACOATA_reverse          | 75.669<br>8  | 9801.989935 | 129.5363531 | 9801.989935 | 129.5363531 |
| MLTP3_reverse           | 181.04<br>48 | 10299.24688 | 56.88783594 | 10299.24688 | 56.88783594 |
| OCBT_reverse_nu<br>m1   | 110.72<br>13 | 19557.83972 | 176.6402645 | 19557.83972 | 176.6402645 |
| OCBT_reverse_nu<br>m2   | 110.48<br>14 | 19557.83972 | 177.0238223 | 19557.83972 | 177.0238223 |
| GARFT_reverse           | 23.238<br>3  | 40052.3476  | 1723.548951 | 40052.3476  | 1723.548951 |
| PHETA1_reverse_<br>num1 | 87.146<br>7  | 31007.86386 | 355.8122553 | 31007.86386 | 355.8122553 |
| PHETA1_reverse_<br>num2 | 87.075<br>6  | 31007.86386 | 356.1027873 | 31007.86386 | 356.1027873 |
| PHETA1_reverse_<br>num3 | 204.56<br>19 | 31007.86386 | 151.5818139 | 31007.86386 | 151.5818139 |
| MCITL2_reverse          | 128.53<br>86 | 20380.45042 | 158.5550988 | 20380.45042 | 158.5550988 |
| ACOTA_reverse_<br>num1  | 91.549<br>3  | 32625.37856 | 356.3695032 | 32625.37856 | 356.3695032 |
| ACOTA_reverse_<br>num2  | 87.330<br>7  | 32625.37856 | 373.5843015 | 32625.37856 | 373.5843015 |
| ACOTA_reverse_<br>num3  | 87.533<br>9  | 32625.37856 | 372.717068  | 32625.37856 | 372.717068  |
| ACOTA_reverse_<br>num4  | 44.729<br>1  | 32625.37856 | 729.3993968 | 32625.37856 | 729.3993968 |
| PRAGSr_reverse          | 45.940<br>4  | 17654.10147 | 384.2827112 | 17654.10147 | 384.2827112 |
| PPAKr_reverse           | 43.384<br>1  | 9938.898806 | 229.0908145 | 9938.898806 | 229.0908145 |
| PPM2_reverse            | 44.37        | 26740.7499  | 602.6763555 | 26740.7499  | 602.6763555 |
| G6PDH2r_reverse         | 55.704<br>4  | 27844.11588 | 499.8548746 | 27844.11588 | 499.8548746 |
| FBA3_reverse            | 78.294<br>5  | 10772.90842 | 137.5947023 | 10772.90842 | 137.5947023 |
| ADK3_reverse            | 23.586       | 12279.19346 | 520.6136462 | 12279.19346 | 520.6136462 |

|                       |          |             |             |             |             |
|-----------------------|----------|-------------|-------------|-------------|-------------|
| HSDy_reverse_num1     | 177.7754 | 638760.4157 | 3593.075396 | 638760.4157 | 3593.075396 |
| HSDy_reverse_num2     | 356.481  | 638760.4157 | 1791.84982  | 638760.4157 | 1791.84982  |
| ACACT7r_reverse_num1  | 46.5305  | 26653.29045 | 572.8133256 | 26653.29045 | 572.8133256 |
| ACACT7r_reverse_num2  | 81.7524  | 26653.29045 | 326.0245626 | 26653.29045 | 326.0245626 |
| ACACT2r_reverse_num1  | 46.5305  | 48623.593   | 1044.983247 | 48623.593   | 1044.983247 |
| ACACT2r_reverse_num2  | 81.7524  | 48623.593   | 594.7665511 | 48623.593   | 594.7665511 |
| ACACT3r_reverse_num1  | 46.5305  | 36960.01261 | 794.3179766 | 36960.01261 | 794.3179766 |
| ACACT3r_reverse_num2  | 81.7524  | 36960.01261 | 452.0969734 | 36960.01261 | 452.0969734 |
| ACACT4r_reverse_num1  | 46.5305  | 34554.87723 | 742.6285388 | 34554.87723 | 742.6285388 |
| ACACT4r_reverse_num2  | 81.7524  | 34554.87723 | 422.6772208 | 34554.87723 | 422.6772208 |
| AHGDx_reverse         | 176.7031 | 28540.16407 | 161.5147899 | 28540.16407 | 161.5147899 |
| TKT2_reverse_num1     | 144.4235 | 149806.8491 | 1037.274745 | 149806.8491 | 1037.274745 |
| TKT2_reverse_num2     | 73.0427  | 149806.8491 | 2050.948954 | 149806.8491 | 2050.948954 |
| ATPS4rpp_reverse_num1 | 543.6444 | 394887.4078 | 726.3707816 | 394887.4078 | 726.3707816 |
| ATPS4rpp_reverse_num2 | 530.0127 | 394887.4078 | 745.0527275 | 394887.4078 | 745.0527275 |
| ECOAH8_reverse_num1   | 77.0722  | 24530.3731  | 318.2778369 | 24530.3731  | 318.2778369 |
| ECOAH8_reverse_num2   | 159.1878 | 24530.3731  | 154.0970671 | 24530.3731  | 154.0970671 |
| ECOAH5_reverse_num1   | 77.0722  | 31162.6381  | 404.3304602 | 31162.6381  | 404.3304602 |
| ECOAH5_reverse_num2   | 159.1878 | 31162.6381  | 195.7602159 | 31162.6381  | 195.7602159 |
| TRSArr_reverse_num1   | 123.2023 | 21843.31589 | 177.296332  | 21843.31589 | 177.296332  |
| TRSArr_reverse_num2   | 30.4274  | 21843.31589 | 717.8830886 | 21843.31589 | 717.8830886 |
| ACACT5r_reverse_num1  | 81.7524  | 35501.71811 | 434.2590323 | 35501.71811 | 434.2590323 |

|                      |          |             |             |             |             |
|----------------------|----------|-------------|-------------|-------------|-------------|
| ACACT5r_reverse_num2 | 46.5305  | 35501.71811 | 762.9773614 | 35501.71811 | 762.9773614 |
| MTHFC_reverse        | 62.0875  | 53981.9901  | 869.450213  | 53981.9901  | 869.450213  |
| MTHFD_reverse        | 62.0875  | 28796.28731 | 463.8016881 | 28796.28731 | 463.8016881 |
| ACACT6r_reverse_num1 | 46.5305  | 29980.30132 | 644.3150476 | 29980.30132 | 644.3150476 |
| ACACT6r_reverse_num2 | 81.7524  | 29980.30132 | 366.7207486 | 29980.30132 | 366.7207486 |
| GGGABADr_reverse     | 53.4186  | 20083.16025 | 375.9581915 | 20083.16025 | 375.9581915 |
| MALTATr_reverse      | 60.288   | 10202.84671 | 169.2351166 | 10202.84671 | 169.2351166 |
| ALAGLUE_reverse      | 34.674   | 22236.80583 | 641.3106602 | 22236.80583 | 641.3106602 |
| CBLAT_reverse        | 21.9989  | 27183.75746 | 1235.687124 | 27183.75746 | 1235.687124 |
| ARABDI_reverse       | 389.86   | 45079.5164  | 115.6300118 | 45079.5164  | 115.6300118 |
| FRULYSDG_reverse     | 462.8308 | 10651.82164 | 23.01450474 | 10651.82164 | 23.01450474 |
| ALLPI_reverse        | 32.1466  | 10258.17606 | 319.106097  | 10258.17606 | 319.106097  |
| ALLULPE_reverse      | 26.1092  | 110777.1111 | 4242.838199 | 110777.1111 | 4242.838199 |
| DHPTPE_reverse       | 112.6563 | 17788.09141 | 157.8969965 | 17788.09141 | 157.8969965 |
| FALDH2_reverse       | 78.718   | 22410.33031 | 284.691307  | 22410.33031 | 284.691307  |
| CBIAT_reverse        | 21.9989  | 21148.31387 | 961.3350609 | 21148.31387 | 961.3350609 |
| GLUDy_reverse_num1   | 291.4882 | 666000      | 2284.826624 | 666000      | 2284.826624 |
| GLUDy_reverse_num2   | 861.249  | 666000      | 773.2955278 | 666000      | 773.2955278 |
| HACD3_reverse_num1   | 159.1878 | 36814.26424 | 231.2631008 | 36814.26424 | 231.2631008 |
| HACD3_reverse_num2   | 77.0722  | 36814.26424 | 477.6594445 | 36814.26424 | 477.6594445 |
| E4PD_reverse_num1    | 149.1976 | 19375.48784 | 129.864608  | 19375.48784 | 129.864608  |
| E4PD_reverse_num2    | 142.13   | 19375.48784 | 136.3222954 | 19375.48784 | 136.3222954 |
| DADK_reverse         | 23.586   | 13343.77709 | 565.7498978 | 13343.77709 | 565.7498978 |

|                          |              |             |             |             |             |
|--------------------------|--------------|-------------|-------------|-------------|-------------|
| CRNCAR_reverse           | 28.190<br>2  | 20738.59238 | 735.6667346 | 20738.59238 | 735.6667346 |
| DHFR_reverse_n<br>um1    | 26.348<br>3  | 20559.74064 | 780.3061543 | 20559.74064 | 780.3061543 |
| DHFR_reverse_n<br>um2    | 17.999<br>4  | 20559.74064 | 1142.245888 | 20559.74064 | 1142.245888 |
| TYRTA_reverse_n<br>um1   | 87.146<br>7  | 24103.01587 | 276.5797886 | 24103.01587 | 276.5797886 |
| TYRTA_reverse_n<br>um2   | 87.075<br>6  | 24103.01587 | 276.8056248 | 24103.01587 | 276.8056248 |
| TYRTA_reverse_n<br>um3   | 204.56<br>19 | 24103.01587 | 117.8274931 | 24103.01587 | 117.8274931 |
| PUNP4_reverse_n<br>um1   | 179.00<br>77 | 9382.349419 | 52.41310524 | 9382.349419 | 52.41310524 |
| PUNP4_reverse_n<br>um2   | 155.69<br>95 | 9382.349419 | 60.259342   | 9382.349419 | 60.259342   |
| AMAOTr_reverse           | 94.671<br>2  | 32523.36129 | 343.5401821 | 32523.36129 | 343.5401821 |
| GLCATr_reverse           | 60.288       | 10000.12983 | 165.8726418 | 10000.12983 | 165.8726418 |
| ALAALAR_revers<br>e_num1 | 39.315<br>8  | 20079.23664 | 510.7167256 | 20079.23664 | 510.7167256 |
| ALAALAR_revers<br>e_num2 | 65.679<br>4  | 20079.23664 | 305.7158963 | 20079.23664 | 305.7158963 |
| ACACT1r_revers<br>e_num1 | 46.530<br>5  | 49056.7815  | 1054.293023 | 49056.7815  | 1054.293023 |
| ACACT1r_revers<br>e_num2 | 161.40<br>99 | 49056.7815  | 303.9267201 | 49056.7815  | 303.9267201 |
| ACACT1r_revers<br>e_num3 | 81.752<br>4  | 49056.7815  | 600.0653375 | 49056.7815  | 600.0653375 |
| SUCOAS_reverse           | 142.34<br>03 | 36798.90163 | 258.5276386 | 36798.90163 | 258.5276386 |
| GALKr_reverse            | 41.442<br>1  | 27093.8564  | 653.7761455 | 27093.8564  | 653.7761455 |
| YUMPS_reverse            | 98.729<br>7  | 117059.4818 | 1185.656208 | 117059.4818 | 1185.656208 |
| ADSL1r_reverse           | 206.17<br>12 | 16835.37942 | 81.65728006 | 16835.37942 | 81.65728006 |
| AICART_reverse           | 57.329<br>2  | 30129.89223 | 525.5592652 | 30129.89223 | 525.5592652 |
| PGM_reverse_nu<br>m1     | 57.112<br>8  | 242966.3202 | 4254.148285 | 242966.3202 | 4254.148285 |
| PGM_reverse_nu<br>m2     | 56.193<br>9  | 242966.3202 | 4323.713431 | 242966.3202 | 4323.713431 |

|                             |              |             |             |             |             |
|-----------------------------|--------------|-------------|-------------|-------------|-------------|
| TPI_reverse                 | 53.943<br>6  | 132458.5014 | 2455.499844 | 132458.5014 | 2455.499844 |
| RPI_reverse_num<br>1        | 45.720<br>8  | 85593.19064 | 1872.084273 | 85593.19064 | 1872.084273 |
| RPI_reverse_num<br>2        | 32.146<br>6  | 85593.19064 | 2662.589221 | 85593.19064 | 2662.589221 |
| PERD_reverse                | 82.735<br>3  | 29134.95894 | 352.1466526 | 29134.95894 | 352.1466526 |
| ATHRDHr_revers<br>e         | 108.99<br>57 | 28339.93201 | 260.0096335 | 28339.93201 | 260.0096335 |
| LSERDHr_reverse             | 108.99<br>57 | 11184.7652  | 102.616573  | 11184.7652  | 102.616573  |
| DSERDHr_revers<br>e         | 108.99<br>57 | 17622.70624 | 161.6825823 | 17622.70624 | 161.6825823 |
| UDPKAAT_rever<br>se         | 41.649<br>8  | 44134.30026 | 1059.652153 | 44134.30026 | 1059.652153 |
| MLTP1_reverse               | 181.04<br>48 | 78285.20605 | 432.4079236 | 78285.20605 | 432.4079236 |
| IPDDI_reverse               | 20.508<br>3  | 55097.27431 | 2686.584179 | 55097.27431 | 2686.584179 |
| DURADx_reverse              | 178.79<br>66 | 14611.84152 | 81.72326273 | 14611.84152 | 81.72326273 |
| ECOAH7_reverse<br>_num1     | 77.072<br>2  | 25171.19057 | 326.5923455 | 25171.19057 | 326.5923455 |
| ECOAH7_reverse<br>_num2     | 159.18<br>78 | 25171.19057 | 158.122611  | 25171.19057 | 158.122611  |
| LDH_D_reverse               | 146.13<br>92 | 11290.79911 | 77.26057836 | 11290.79911 | 77.26057836 |
| T2DECAI_reverse             | 37.938<br>1  | 17543.29767 | 462.4189843 | 17543.29767 | 462.4189843 |
| CLPNS180pp_rev<br>erse_num1 | 54.822<br>3  | 9824.361941 | 179.2037536 | 9824.361941 | 179.2037536 |
| CLPNS180pp_rev<br>erse_num2 | 47.633<br>5  | 9824.361941 | 206.2490042 | 9824.361941 | 206.2490042 |
| CLPNS181pp_rev<br>erse_num1 | 54.822<br>3  | 10525.55087 | 191.9939672 | 10525.55087 | 191.9939672 |
| CLPNS181pp_rev<br>erse_num2 | 47.633<br>5  | 10525.55087 | 220.969504  | 10525.55087 | 220.969504  |
| CLPNS120pp_rev<br>erse_num1 | 47.633<br>5  | 17185.48773 | 360.7857439 | 17185.48773 | 360.7857439 |
| CLPNS120pp_rev<br>erse_num2 | 54.822<br>3  | 17185.48773 | 313.4762265 | 17185.48773 | 313.4762265 |
| CLPNS160pp_rev<br>erse_num1 | 47.633<br>5  | 19150.79185 | 402.0446083 | 19150.79185 | 402.0446083 |

|                             |              |             |             |             |             |
|-----------------------------|--------------|-------------|-------------|-------------|-------------|
| CLPNS160pp_rev<br>erse_num2 | 54.822<br>3  | 19150.79185 | 349.3248522 | 19150.79185 | 349.3248522 |
| CLPNS161pp_rev<br>erse_num1 | 54.822<br>3  | 13654.34394 | 249.0655069 | 13654.34394 | 249.0655069 |
| CLPNS161pp_rev<br>erse_num2 | 47.633<br>5  | 13654.34394 | 286.6542232 | 13654.34394 | 286.6542232 |
| HPYRI_reverse               | 58.754<br>9  | 10252.32424 | 174.4930931 | 10252.32424 | 174.4930931 |
| GUI2_reverse                | 53.987<br>2  | 1106757.021 | 20500.35972 | 1106757.021 | 20500.35972 |
| 3OAR120_reverse             | 102.24<br>12 | 168004.9209 | 1643.221332 | 168004.9209 | 1643.221332 |
| ACONTb_reverse<br>_num1     | 186.99<br>62 | 58615.67725 | 313.4591893 | 58615.67725 | 313.4591893 |
| ACONTb_reverse<br>_num2     | 195.35<br>44 | 58615.67725 | 300.0478989 | 58615.67725 | 300.0478989 |
| MICITDr_reverse             | 186.99<br>62 | 42684.56006 | 228.264318  | 42684.56006 | 228.264318  |
| ACONTa_reverse<br>_num1     | 186.99<br>62 | 34269.90152 | 183.2652296 | 34269.90152 | 183.2652296 |
| ACONTa_reverse<br>_num2     | 195.35<br>44 | 34269.90152 | 175.4242624 | 34269.90152 | 175.4242624 |
| 3OAR140_reverse             | 102.24<br>12 | 10447.04323 | 102.1803659 | 10447.04323 | 102.1803659 |
| 3OAR160_reverse             | 102.24<br>12 | 15760.16442 | 154.1469038 | 15760.16442 | 154.1469038 |
| CLPNS140pp_rev<br>erse_num1 | 54.822<br>3  | 25952.24174 | 473.3884157 | 25952.24174 | 473.3884157 |
| CLPNS140pp_rev<br>erse_num2 | 47.633<br>5  | 25952.24174 | 544.8317201 | 25952.24174 | 544.8317201 |
| CLPNS141pp_rev<br>erse_num1 | 54.822<br>3  | 18706.27168 | 341.21647   | 18706.27168 | 341.21647   |
| CLPNS141pp_rev<br>erse_num2 | 47.633<br>5  | 18706.27168 | 392.7125171 | 18706.27168 | 392.7125171 |
| 3OAR60_reverse              | 102.24<br>12 | 16171.49843 | 158.1700765 | 16171.49843 | 158.1700765 |
| 3OAR80_reverse              | 102.24<br>12 | 41062.49348 | 401.6237435 | 41062.49348 | 401.6237435 |
| 3OAR40_reverse              | 102.24<br>12 | 15479.59285 | 151.4026914 | 15479.59285 | 151.4026914 |
| 3OAR100_reverse             | 102.24<br>12 | 21350.28    | 208.8226664 | 21350.28    | 208.8226664 |
| 3OAR180_reverse             | 102.24<br>12 | 11764.09956 | 115.0622211 | 11764.09956 | 115.0622211 |

|                         |              |             |             |             |             |
|-------------------------|--------------|-------------|-------------|-------------|-------------|
| ACOAD7f_revers<br>e     | 89.224<br>4  | 460800      | 5164.50657  | 460800      | 5164.50657  |
| ACOAD8f_revers<br>e     | 89.224<br>4  | 323145.3704 | 3621.715253 | 323145.3704 | 3621.715253 |
| ACOAD5f_revers<br>e     | 89.224<br>4  | 1281600     | 14363.7839  | 1281600     | 14363.7839  |
| ACOAD3f_revers<br>e     | 89.224<br>4  | 1281600     | 14363.7839  | 1281600     | 14363.7839  |
| ACOAD2f_revers<br>e     | 89.224<br>4  | 1281600     | 14363.7839  | 1281600     | 14363.7839  |
| ACOAD4f_revers<br>e     | 89.224<br>4  | 1281600     | 14363.7839  | 1281600     | 14363.7839  |
| ACOAD6f_revers<br>e     | 89.224<br>4  | 1000800     | 11216.66271 | 1000800     | 11216.66271 |
| FRULYSE_reverse         | 249.35<br>06 | 26511.74296 | 106.3231569 | 26511.74296 | 106.3231569 |
| POR5_reverse_nu<br>m1   | 148.56<br>14 | 52980.56892 | 356.6240552 | 52980.56892 | 356.6240552 |
| POR5_reverse_nu<br>m2   | 148.52<br>46 | 52980.56892 | 356.7124161 | 52980.56892 | 356.7124161 |
| HACD8_reverse_<br>num1  | 159.18<br>78 | 23805.65727 | 149.5444831 | 23805.65727 | 149.5444831 |
| HACD8_reverse_<br>num2  | 77.072<br>2  | 23805.65727 | 308.8747599 | 23805.65727 | 308.8747599 |
| CTECOAI8_rever<br>se    | 159.18<br>78 | 51918.91394 | 326.1488251 | 51918.91394 | 326.1488251 |
| CTECOAI6_rever<br>se    | 159.18<br>78 | 29128.12964 | 182.9796607 | 29128.12964 | 182.9796607 |
| REPHACCOAI_r<br>everse  | 28.404<br>6  | 10703.34754 | 376.8174006 | 10703.34754 | 376.8174006 |
| DHNPTE_reverse          | 108.95<br>62 | 10065.04768 | 92.37700728 | 10065.04768 | 92.37700728 |
| FORCT_reverse           | 91.656<br>4  | 129064.0685 | 1408.129367 | 129064.0685 | 1408.129367 |
| HADPCOADH3_<br>reverse  | 51.732<br>6  | 18258.39275 | 352.9378526 | 18258.39275 | 352.9378526 |
| AACT8r_revers<br>e_num1 | 46.530<br>5  | 30393.77583 | 653.201144  | 30393.77583 | 653.201144  |
| AACT8r_revers<br>e_num2 | 81.752<br>4  | 30393.77583 | 371.7783922 | 30393.77583 | 371.7783922 |
| CTECOAI7_rever<br>se    | 159.18<br>78 | 198000      | 1243.81391  | 198000      | 1243.81391  |
| DHACOA_H_reve<br>rse    | 27.237<br>4  | 12132.60569 | 445.439201  | 12132.60569 | 445.439201  |

|                      |              |             |             |             |             |
|----------------------|--------------|-------------|-------------|-------------|-------------|
| ALDD19xr_reverse     | 214.79<br>65 | 9300.75871  | 43.3003271  | 9300.75871  | 43.3003271  |
| VPAMTr_reverse       | 46.711<br>2  | 10207.799   | 218.5300098 | 10207.799   | 218.5300098 |
| 13PPDH2_reverse      | 84.194       | 10451.44479 | 124.1352684 | 10451.44479 | 124.1352684 |
| GHBDHx_reverse       | 124.63<br>26 | 135145.7337 | 1084.353    | 135145.7337 | 1084.353    |
| APPLDHr_reverse      | 309.69<br>76 | 20318.82558 | 65.60859878 | 20318.82558 | 65.60859878 |
| DHNPA2r_reverse      | 108.95<br>62 | 11082.16412 | 101.7121019 | 11082.16412 | 101.7121019 |
| NADHXE_reverse       | 54.650<br>3  | 13156.18454 | 240.7339858 | 13156.18454 | 240.7339858 |
| NADPHXE_reverse      | 54.650<br>3  | 922865.2178 | 16886.73654 | 922865.2178 | 16886.73654 |
| DXYLTD_reverse_num1  | 69.399<br>2  | 71697.11216 | 1033.111508 | 71697.11216 | 1033.111508 |
| DXYLTD_reverse_num2  | 70.016<br>8  | 71697.11216 | 1023.9987   | 71697.11216 | 1023.9987   |
| 2DDARAA_reverse_num1 | 32.721<br>7  | 9688.408474 | 296.0851201 | 9688.408474 | 296.0851201 |
| 2DDARAA_reverse_num2 | 130.12<br>16 | 9688.408474 | 74.45657349 | 9688.408474 | 74.45657349 |
| ACOXT_reverse        | 83.341<br>5  | 10077.21241 | 120.9146993 | 10077.21241 | 120.9146993 |
| 4ABZGLUH_reverse     | 197.56<br>37 | 31226.50825 | 158.0579238 | 31226.50825 | 158.0579238 |
| PCNO_reverse         | 69.447<br>5  | 18766.78821 | 270.2298601 | 18766.78821 | 270.2298601 |
| 5DKGR_reverse_num1   | 27.07        | 23521.17739 | 868.9020092 | 23521.17739 | 868.9020092 |
| 5DKGR_reverse_num2   | 27.562<br>7  | 23521.17739 | 853.3698582 | 23521.17739 | 853.3698582 |
| LKDRA_reverse        | 173.49<br>61 | 9819.411113 | 56.59730168 | 9819.411113 | 56.59730168 |
| METNA_reverse        | 38.495<br>4  | 27085.97543 | 703.6158978 | 27085.97543 | 703.6158978 |
| PUACGAMS_reverse     | 66.847<br>6  | 82566.7816  | 1235.149528 | 82566.7816  | 1235.149528 |
| ARHGDx_reverse       | 176.70<br>31 | 9808.83436  | 55.51025624 | 9808.83436  | 55.51025624 |
| INOSTO_reverse       | 61.164<br>4  | 28380.97591 | 464.0113515 | 28380.97591 | 464.0113515 |

|                |              |             |             |             |             |
|----------------|--------------|-------------|-------------|-------------|-------------|
| UDPGPT_reverse | 52.408<br>5  | 46403.30621 | 885.4156522 | 46403.30621 | 885.4156522 |
| 4HTHRA_reverse | 145.97<br>88 | 16492.0015  | 112.975319  | 16492.0015  | 112.975319  |
| RHMND_reverse  | 353.81<br>17 | 16526.48756 | 46.70983904 | 16526.48756 | 46.70983904 |

**Table S4 Enzyme cost of energy metabolism in *E. coli***

|                       | ATP produced<br>per flux of<br>glucose<br>(mmol/gDW/h) | Enzyme required per<br>flux of glucose (mg<br>enzyme / gDW) | Enzyme cost (g<br>enzyme for 1 mol ATP<br>/ h) |
|-----------------------|--------------------------------------------------------|-------------------------------------------------------------|------------------------------------------------|
| High-yield<br>pathway | 23.5                                                   | 55.99                                                       | 2.38                                           |
| Low-yield<br>pathway  | 11                                                     | 6.83                                                        | 0.62                                           |

**Table S5 The maximum growth rates**

| Carbon sources<br>name     | measure<br>d (h <sup>-1</sup> ) | predicted<br>by<br>eciML1515<br>(h <sup>-1</sup> ) | predicted by<br>iML1515(h <sup>-1</sup> ) | predicted by<br>GECKO(h <sup>-1</sup> ) | predicted<br>by<br>sMOMENT<br>(h <sup>-1</sup> ) |
|----------------------------|---------------------------------|----------------------------------------------------|-------------------------------------------|-----------------------------------------|--------------------------------------------------|
| N-Acetyl-D-<br>glucosamine | 0.61 ±0.03                      | 0.618                                              | 1.122                                     | 0.215                                   | 0.215                                            |
| Acetate                    | 0.29 ±0.02                      | 0.209                                              | 0.209                                     | 0.133                                   | 0.133                                            |
| 2-Oxoglutarate             | 0.24 ±0.04                      | 0.473                                              | 0.543                                     | 0.189                                   | 0.189                                            |
| L-Alanine                  | 0.24 ±0.03                      | 0.347                                              | 0.378                                     | 0.161                                   | 0.161                                            |
| Fructose                   | 0.54 ±0.04                      | 0.677                                              | 0.870                                     | 0.202                                   | 0.202                                            |
| Fumarate                   | 0.47 ±0.03                      | 0.395                                              | 0.409                                     | 0.199                                   | 0.199                                            |
| Glucose 6-<br>phosphate    | 0.78 ±0.04                      | 0.693                                              | 0.898                                     | 0.275                                   | 0.275                                            |
| Galactose                  | 0.24 ±0.02                      | 0.575                                              | 0.860                                     | 0.209                                   | 0.209                                            |
| Glucosamine                | 0.4 ±0.03                       | 0.653                                              | 0.870                                     | 0.197                                   | 0.197                                            |
| Gluconate                  | 0.68 ±0.03                      | 0.626                                              | 0.792                                     | 0.206                                   | 0.206                                            |

|           |            |       |       |       |       |
|-----------|------------|-------|-------|-------|-------|
| Glucose   | 0.66 ±0.05 | 0.680 | 0.870 | 0.223 | 0.223 |
| Glycerol  | 0.47 ±0.03 | 0.428 | 0.492 | 0.227 | 0.227 |
| Guanosine | 0.37 ±0.03 | 0.475 | 1.030 | 0.267 | 0.267 |
| L-Lactate | 0.41 ±0.03 | 0.347 | 0.347 | 0.168 | 0.168 |
| Maltose   | 0.52 ±0.02 | 0.602 | 1.765 | 0.148 | 0.148 |
| L-Malate  | 0.55 ±0.03 | 0.409 | 0.409 | 0.192 | 0.192 |
| Mannose   | 0.35 ±0.03 | 0.652 | 0.870 | 0.20  | 0.20  |
| Mannitol  | 0.61 ±0.03 | 0.657 | 0.935 | 0.22  | 0.22  |
| Pyruvate  | 0.41 ±0.03 | 0.312 | 0.312 | 0.152 | 0.152 |
| Ribose    | 0.41 ±0.01 | 0.538 | 0.683 | 0.171 | 0.171 |
| Sorbitol  | 0.48 ±0.03 | 0.550 | 0.935 | 0.218 | 0.218 |
| Succinate | 0.5 ±0.02  | 0.426 | 0.447 | 0.195 | 0.195 |
| Trehalose | 0.48 ±0.04 | 0.672 | 1.765 | 0.245 | 0.245 |
| Xylose    | 0.51 ±0.03 | 0.379 | 0.711 | 0.177 | 0.177 |
